# Supplementary material for: Epigenetic aging signatures and age prediction in human skeletal muscle
Source: Aging (Albany NY). 2025 Nov 26;17(11):2809–43. doi: 10.18632/aging.206341 (PMC12705185; doi:10.18632/aging.206341)
Supplement: Supplementary Table 1 [file aging-17-11-206341-s002.xlsx]

## Sheet: sheet1
Supplementary Table 1. Statistical results of linear regression between age and beta values from 23 samples using the EPIC array.
CpG_ID	R2	Estimate	Std. Error	t-value	p	FDR p-value	Min	Max	Δβ
cg00000109	0.173963	0.00107533	0.000511333	2.103	0.0476992	0.461433	0.758555	0.897011	0.138456
cg00000363	0.278233	0.0018069	0.000635067	2.84522	0.00969289	0.303169	0.266607	0.447298	0.180691
cg00000714	0.204806	0.000853579	0.000367028	2.32565	0.0301353	0.405967	0.0811731	0.186613	0.10544
cg00000974	0.206656	0.000125298	5.35722e-05	2.33885	0.0293092	0.40278	0.0163345	0.0320838	0.0157493
cg00001784	0.225905	-0.00112033	0.000452554	-2.47557	0.0219024	0.372597	0.739394	0.886577	0.147183
cg00001814	0.383115	0.00269111	0.000745177	3.61137	0.00163883	0.209657	0.50524	0.729393	0.224153
cg00001854	0.21435	-0.00238933	0.000998206	-2.39363	0.0261001	0.390296	0.662921	0.956911	0.29399
cg00002236	0.252782	-0.000179657	6.74038e-05	-2.66538	0.0144774	0.333698	0.0291516	0.0529816	0.02383
cg00002593	0.245004	-0.00315772	0.00120962	-2.6105	0.0163357	0.344396	0.319612	0.661495	0.341883
cg00002684	0.255283	-0.00106976	0.000398715	-2.68302	0.0139237	0.330848	0.348607	0.469373	0.120766
cg00002926	0.183592	-0.000381526	0.000175566	-2.17311	0.0413605	0.443045	0.895681	0.937379	0.0416979
cg00003345	0.211698	-0.00127965	0.000538851	-2.37477	0.0271661	0.39438	0.0974029	0.255509	0.158106
cg00003640	0.184021	-0.000564441	0.000259367	-2.17623	0.0410977	0.442351	0.802723	0.879677	0.0769544
cg00004082	0.339658	0.000544448	0.000165657	3.2866	0.00351819	0.243067	0.0460021	0.088914	0.0429119
cg00004562	0.208565	0.00102282	0.000434788	2.35247	0.0284793	0.399385	0.733448	0.861481	0.128033
cg00004667	0.313789	0.00389871	0.00125812	3.09884	0.00543749	0.263714	0.368767	0.788933	0.420166
cg00004786	0.223471	0.00135269	0.000550244	2.45834	0.0227293	0.376271	0.530016	0.686579	0.156563
cg00005325	0.360983	0.00221657	0.000643553	3.44427	0.00243148	0.225558	0.326445	0.558397	0.231951
cg00005440	0.27219	0.000829172	0.000295875	2.80244	0.010671	0.31099	0.0834827	0.166207	0.0827242
cg00005893	0.233842	0.000442649	0.000174843	2.5317	0.0194	0.361358	0.889526	0.947949	0.0584229
cg00006040	0.195409	0.00141985	0.000628708	2.25836	0.034689	0.422674	0.526926	0.70156	0.174634
cg00006081	0.310489	0.000676037	0.000219841	3.07512	0.00574266	0.267803	0.118654	0.190609	0.0719552
cg00006378	0.369508	0.00218601	0.000623117	3.50818	0.0020916	0.218783	0.369122	0.581907	0.212784
cg00006387	0.258226	0.000324142	0.000119884	2.7038	0.0132974	0.327439	0.936547	0.974036	0.0374897
cg00006414	0.210414	-0.000711491	0.000300762	-2.36563	0.0276974	0.396337	0.027845	0.114214	0.0863685
cg00006459	0.187412	0.000745732	0.000338852	2.20076	0.039079	0.436547	0.81272	0.92133	0.108611
cg00006600	0.297582	0.00208402	0.000698694	2.98274	0.00709607	0.28192	0.240267	0.474919	0.234652
cg00006609	0.192077	-0.000413952	0.000185262	-2.23441	0.0364568	0.429035	0.916875	0.96463	0.047755
cg00006626	0.20495	-0.00147252	0.000632884	-2.32668	0.0300703	0.405761	0.709867	0.89763	0.187762
cg00006899	0.282094	0.00128095	0.000445922	2.87259	0.00911259	0.298594	0.741496	0.894567	0.153071
cg00007127	0.240483	0.00125895	0.000488231	2.5786	0.017517	0.351086	0.702804	0.868176	0.165372
cg00007221	0.32365	0.00237992	0.00075076	3.17002	0.0046132	0.256622	0.636473	0.860642	0.224168
cg00007317	0.218568	-0.000469456	0.000193704	-2.42358	0.024486	0.383633	0.867188	0.926185	0.0589968
cg00007675	0.347452	0.00173039	0.000517481	3.34388	0.00307741	0.237517	0.712222	0.872645	0.160423
cg00007800	0.246736	-0.00125157	0.000477205	-2.62272	0.0159035	0.341823	0.661029	0.801127	0.140098
cg00008036	0.239152	0.000240998	9.38026e-05	2.5692	0.0178799	0.352839	0.0509883	0.0814108	0.0304225
cg00009737	0.227854	0.000921545	0.000370194	2.48936	0.0212611	0.369853	0.812339	0.902897	0.0905584
cg00009944	0.173464	-0.000941913	0.000448671	-2.09934	0.0480524	0.462347	0.667825	0.770911	0.103087
cg00010168	0.181947	0.00229203	0.00106054	2.16119	0.0423819	0.44596	0.0761368	0.339926	0.263789
cg00010445	0.480673	0.00268907	0.000609942	4.40873	0.000244511	0.156716	0.246181	0.447427	0.201246
cg00010654	0.311236	0.000895375	0.00029066	3.08049	0.00567218	0.266963	0.081381	0.16984	0.088459
cg00010954	0.24014	0.0020158	0.000782479	2.57618	0.0176099	0.351595	0.466395	0.711235	0.244839
cg00011203	0.241447	0.00102247	0.000395478	2.5854	0.0172587	0.349865	0.0774582	0.201773	0.124315
cg00011274	0.189466	0.000678087	0.000306052	2.21559	0.0379028	0.433229	0.83518	0.912319	0.0771384
cg00011861	0.172331	0.00128178	0.000612986	2.09104	0.048863	0.464668	0.199964	0.398033	0.19807
cg00012148	0.233185	-0.000516496	0.000204386	-2.52706	0.0195963	0.361985	0.883404	0.949516	0.0661123
cg00013369	0.192261	0.000205985	9.21333e-05	2.23573	0.0363571	0.428773	0.940587	0.967153	0.0265655
cg00013441	0.206273	0.000976535	0.000418016	2.33612	0.0294786	0.403312	0.1946	0.304036	0.109437
cg00013618	0.181142	-0.000416048	0.000193032	-2.15534	0.042891	0.447689	0.910234	0.962968	0.0527338
cg00013991	0.338836	0.000689005	0.000210026	3.28057	0.00356798	0.243697	0.859121	0.926525	0.0674042
cg00014020	0.304378	-0.00159401	0.000525848	-3.03131	0.00635022	0.27444	0.543252	0.71761	0.174358
cg00014260	0.199005	-0.000723644	0.000316809	-2.28416	0.0328732	0.416171	0.592479	0.702773	0.110294
cg00014380	0.248179	0.00150765	0.00057262	2.6329	0.0155515	0.339615	0.580306	0.767151	0.186844
cg00014467	0.186048	0.00125976	0.000574996	2.1909	0.0398793	0.438947	0.674567	0.872393	0.197826
cg00014502	0.190516	0.000839956	0.00037782	2.22316	0.0373145	0.431325	0.799635	0.922664	0.123028
cg00014900	0.265677	-0.00184913	0.000670849	-2.75641	0.0118286	0.318561	0.352806	0.551182	0.198376
cg00015373	0.188674	0.000459925	0.000208123	2.20987	0.0383522	0.43434	0.90588	0.960564	0.0546834
cg00015603	0.218008	0.000501716	0.000207354	2.41961	0.0246945	0.384475	0.874236	0.948004	0.0737682
cg00015639	0.191656	0.00189159	0.000847723	2.23137	0.0366865	0.429698	0.400933	0.662902	0.261969
cg00016360	0.208116	-0.000241018	0.000102593	-2.34927	0.0286725	0.400263	0.938596	0.968529	0.0299331
cg00016783	0.276635	0.00231378	0.000816463	2.8339	0.009943	0.305077	0.720951	0.953449	0.232498
cg00016841	0.263186	0.00022924	8.37006e-05	2.73881	0.0123018	0.321251	0.0494856	0.0722875	0.0228019
cg00016913	0.210789	0.00111983	0.000472843	2.3683	0.0275412	0.395919	0.254104	0.389968	0.135864
cg00017157	0.237007	0.00626441	0.00245273	2.55406	0.0184799	0.356326	0.0483601	0.66942	0.62106
cg00017203	0.404705	-0.000952649	0.000252127	-3.77845	0.00110211	0.194862	0.863478	0.948161	0.0846825
cg00017461	0.361018	0.00137458	0.000399063	3.44453	0.00243	0.225558	0.656692	0.77675	0.120058
cg00017578	0.19012	0.000534439	0.000240705	2.22031	0.0375353	0.432144	0.828787	0.903644	0.0748573
cg00017842	0.403754	0.00147848	0.000392067	3.77099	0.00112184	0.1955	0.792313	0.918999	0.126686
cg00017887	0.216801	0.000662893	0.000274941	2.41104	0.02515	0.386415	0.886916	0.95845	0.0715336
cg00018391	0.21975	0.0015024	0.000617771	2.43196	0.024051	0.381773	0.25458	0.442077	0.187496
cg00018845	0.176681	0.000420479	0.000198072	2.12286	0.0458199	0.456195	0.058988	0.130517	0.0715293
cg00019085	0.246398	-0.00242505	0.000925471	-2.62034	0.0159869	0.342319	0.0197051	0.376424	0.356719
cg00019093	0.346718	0.000274412	8.21971e-05	3.33847	0.00311663	0.238049	0.0160506	0.0421708	0.0261202
cg00019377	0.261937	0.000602523	0.000220705	2.72999	0.0125458	0.322983	0.106723	0.167341	0.0606178
cg00019997	0.176856	-0.0004547	0.000214064	-2.12413	0.045702	0.455837	0.863352	0.923789	0.0604369
cg00020063	0.288218	0.00108325	0.000371478	2.91606	0.00825848	0.291378	0.633671	0.755255	0.121584
cg00020390	0.234083	0.00068103	0.000268821	2.5334	0.0193285	0.360951	0.889679	0.959741	0.0700627
cg00020794	0.317714	-0.000836006	0.000267341	-3.12712	0.00509425	0.26053	0.712201	0.798409	0.086208
cg00021264	0.18772	-0.00126393	0.000573733	-2.20298	0.0389004	0.436103	0.549977	0.735265	0.185288
cg00021350	0.261413	0.000423197	0.000155228	2.72629	0.0126493	0.323416	0.0140112	0.0736586	0.0596474
cg00021659	0.259476	0.00255128	0.000940522	2.71262	0.0130396	0.326063	0.410404	0.718118	0.307714
cg00021762	0.406442	0.00289325	0.000762974	3.79208	0.00106692	0.194196	0.578867	0.814561	0.235694
cg00021944	0.234464	0.000200218	7.89476e-05	2.53609	0.019216	0.360208	0.0248549	0.0477249	0.0228699
cg00022021	0.216264	0.000906427	0.000376545	2.40722	0.0253555	0.387319	0.83169	0.929991	0.0983002
cg00022064	0.318117	0.00197383	0.00063061	3.13003	0.00506013	0.260212	0.386282	0.557385	0.171103
cg00022688	0.229202	0.00196461	0.000786193	2.4989	0.0208278	0.367839	0.101603	0.36368	0.262077
cg00022826	0.194948	0.00155089	0.000687741	2.25505	0.0349285	0.423598	0.52595	0.702982	0.177032
cg00023168	0.230359	0.000312376	0.000124597	2.50708	0.0204626	0.366282	0.0174206	0.0532255	0.035805
cg00023197	0.225984	0.000313922	0.000126779	2.47613	0.0218759	0.372561	0.0502543	0.0855246	0.0352703
cg00023345	0.180238	0.00107271	0.000499221	2.14876	0.0434698	0.44956	0.587884	0.730884	0.143
cg00023363	0.201953	0.00019438	8.43202e-05	2.30526	0.0314536	0.411024	0.942371	0.97495	0.0325784
cg00023826	0.363153	-0.00348852	0.0010081	-3.46048	0.00234044	0.223948	0.591236	0.909688	0.318452
cg00024377	0.252028	-0.000447919	0.000168387	-2.66006	0.0146485	0.334279	0.0392165	0.0955663	0.0563498
cg00024471	0.179926	0.000975343	0.000454389	2.14649	0.0436712	0.450143	0.722378	0.866791	0.144413
cg00025002	0.293965	-0.000812443	0.000274757	-2.95695	0.00752572	0.285	0.816081	0.918241	0.102161
cg00025331	0.327933	0.00171987	0.000537279	3.20107	0.0042928	0.252372	0.554957	0.724017	0.16906
cg00025347	0.182603	-0.000959141	0.000442829	-2.16594	0.0419721	0.444726	0.806255	0.961042	0.154788
cg00025439	0.201985	-0.000786688	0.000341223	-2.30549	0.0314383	0.411006	0.0673402	0.182093	0.114752
cg00025591	0.278603	0.0013895	0.000487916	2.84784	0.00963585	0.302717	0.703616	0.873151	0.169535
cg00025991	0.199125	0.000984502	0.00043085	2.28502	0.0328145	0.41595	0.601246	0.753964	0.152717
cg00026239	0.178626	0.00197601	0.000924648	2.13704	0.0445199	0.452945	0.721178	0.963788	0.24261
cg00026401	0.289101	0.00174076	0.000595674	2.92234	0.0081418	0.289978	0.138746	0.321787	0.183041
cg00026553	0.186187	0.00101968	0.000465204	2.19191	0.0397967	0.438658	0.781816	0.905509	0.123693
cg00026554	0.48187	-0.00194011	0.000439006	-4.41932	0.000238405	0.156264	0.394526	0.554898	0.160372
cg00026920	0.330104	0.000606189	0.000188441	3.21686	0.00413836	0.250942	0.89408	0.953632	0.0595517
cg00027083	0.215345	0.000436036	0.000181629	2.4007	0.0257103	0.38858	0.0206243	0.0757207	0.0550964
cg00027114	0.24767	0.00116199	0.000441936	2.62931	0.0156749	0.340356	0.677848	0.799832	0.121984
cg00027466	0.209508	-0.0006611	0.000280224	-2.35918	0.028078	0.397788	0.831984	0.921294	0.0893104
cg00027499	0.247611	0.000181672	6.91059e-05	2.62889	0.0156892	0.340356	0.0271132	0.0469436	0.0198304
cg00027669	0.19755	0.00150956	0.000663912	2.27373	0.0335968	0.418768	0.48633	0.681113	0.194783
cg00027995	0.195928	0.000489931	0.000216583	2.26209	0.0344212	0.421813	0.891726	0.963085	0.0713596
cg00028550	0.185085	0.00144844	0.000663224	2.18393	0.0404535	0.440474	0.500026	0.685008	0.184982
cg00028677	0.262247	-0.000920702	0.000336984	-2.73218	0.0124847	0.322599	0.856623	0.972958	0.116334
cg00028899	0.185338	0.000685298	0.000313528	2.18576	0.0403022	0.440098	0.833741	0.923422	0.0896804
cg00028935	0.212562	0.000903662	0.000379543	2.38092	0.0268141	0.393012	0.443623	0.548281	0.104658
cg00029150	0.21711	0.00210392	0.000871824	2.41323	0.0250326	0.385998	0.0544065	0.255221	0.200814
cg00029336	0.524854	-0.00190689	0.000395922	-4.81632	9.2586e-05	0.133139	0.730706	0.90809	0.177384
cg00029353	0.225394	0.000147131	5.952e-05	2.47196	0.0220734	0.373402	0.0142574	0.0307943	0.016537
cg00029583	0.212448	0.00222167	0.000933432	2.38011	0.0268604	0.393214	0.611611	0.886041	0.27443
cg00029587	0.195107	0.00112113	0.000496911	2.2562	0.0348458	0.42333	0.556235	0.719455	0.16322
cg00029648	0.302438	0.00192046	0.000636456	3.01742	0.00655537	0.276385	0.434499	0.61376	0.179261
cg00030290	0.180736	0.00161201	0.000748941	2.15238	0.0431502	0.448442	0.179119	0.399324	0.220205
cg00030291	0.185598	-0.00058801	0.000268787	-2.18764	0.0401466	0.43965	0.0778216	0.148291	0.0704692
cg00030296	0.236156	0.00137001	0.000537674	2.54804	0.0187233	0.357758	0.430002	0.602556	0.172554
cg00030427	0.183376	0.00158421	0.000729531	2.17155	0.0414932	0.443276	0.38327	0.553069	0.169798
cg00030476	0.270082	-0.00156884	0.000562806	-2.78754	0.0110335	0.313496	0.781239	0.94139	0.160152
cg00030508	0.214242	0.000256669	0.000107264	2.39286	0.0261425	0.390472	0.0495854	0.0817787	0.0321933
cg00031042	0.178143	0.00269143	0.0012615	2.13352	0.0448395	0.453899	0.540913	0.854189	0.313277
cg00031256	0.255645	0.00025547	9.51267e-05	2.68558	0.0138452	0.330704	0.024932	0.0584311	0.0334991
cg00031303	0.189174	0.00131562	0.000594365	2.21349	0.0380676	0.433698	0.0577757	0.217949	0.160173
cg00031346	0.178971	0.00109497	0.000511779	2.13954	0.0442934	0.452121	0.779157	0.929726	0.150569
cg00031803	0.352596	0.00165184	0.000488435	3.3819	0.00281511	0.232736	0.767643	0.926092	0.15845
cg00032884	0.19998	-0.00214376	0.000935672	-2.29115	0.032397	0.414731	0.577767	0.861071	0.283304
cg00032923	0.234347	-0.00108511	0.000428007	-2.53527	0.0192504	0.36042	0.826856	0.944117	0.11726
cg00033155	0.233772	-0.00150163	0.000593248	-2.5312	0.019421	0.361463	0.229247	0.413987	0.184739
cg00033334	0.479973	-0.000420663	9.55498e-05	-4.40256	0.000248147	0.156962	0.930454	0.971319	0.0408651
cg00033457	0.191555	0.00018423	8.25903e-05	2.23065	0.0367419	0.429883	0.0136879	0.0426172	0.0289293
cg00033533	0.173581	0.000380213	0.000181036	2.1002	0.047969	0.462131	0.0298338	0.0919505	0.0621167
cg00033580	0.347502	-0.00114274	0.000341702	-3.34425	0.00307473	0.237517	0.724146	0.847351	0.123205
cg00033678	0.261503	0.00227117	0.00083287	2.72693	0.0126316	0.323396	0.631123	0.886396	0.255273
cg00033750	0.175946	0.00164146	0.00077519	2.11749	0.0463211	0.457758	0.570317	0.791508	0.221191
cg00034154	0.231776	-0.00218319	0.000867344	-2.5171	0.020024	0.364216	0.136415	0.369969	0.233554
cg00034409	0.412378	0.0037708	0.000982257	3.83892	0.000954282	0.191585	0.514168	0.8332	0.319032
cg00034416	0.315065	0.000193587	6.22862e-05	3.10803	0.00532363	0.262564	0.0253432	0.0491377	0.0237946
cg00034468	0.280132	-0.000746576	0.000261162	-2.85868	0.00940325	0.300854	0.170119	0.231054	0.0609348
cg00034559	0.286141	0.00207753	0.000716069	2.9013	0.00853948	0.293623	0.614341	0.794622	0.180281
cg00035316	0.207922	0.00237786	0.00101277	2.34788	0.0287565	0.400601	0.438951	0.765656	0.326704
cg00035348	0.176748	0.00117976	0.000555613	2.12335	0.0457746	0.456035	0.784125	0.951572	0.167447
cg00035449	0.200271	-0.00826986	0.00360621	-2.29323	0.0322562	0.414125	0.0321193	0.934696	0.902576
cg00035689	0.29185	0.00289697	0.000984729	2.9419	0.00778797	0.287153	0.385925	0.668347	0.282422
cg00035934	0.185684	0.000790703	0.000361337	2.18827	0.0400951	0.43952	0.818836	0.934772	0.115936
cg00036114	0.372155	0.000487181	0.000138085	3.52813	0.00199537	0.215908	0.0204607	0.0725637	0.0521029
cg00037013	0.441961	0.00175022	0.000429162	4.07821	0.000538943	0.175495	0.260623	0.403426	0.142803
cg00038450	0.338041	-0.0019743	0.000602884	-3.27475	0.00361671	0.244122	0.189953	0.364559	0.174607
cg00038760	0.197045	0.000379469	0.000167159	2.27011	0.0338513	0.419767	0.909891	0.973662	0.0637713
cg00038791	0.184854	0.000440709	0.000201951	2.18226	0.0405925	0.440898	0.914942	0.967588	0.0526462
cg00038877	0.209876	-0.00225268	0.000953794	-2.3618	0.0279225	0.397254	0.468662	0.741233	0.272571
cg00039326	0.222717	-0.00237098	0.000966564	-2.453	0.0229912	0.377373	0.204302	0.51821	0.313908
cg00039385	0.171412	-0.00162255	0.000778462	-2.08431	0.0495305	0.466683	0.0410647	0.26081	0.219745
cg00039463	0.317234	0.00135115	0.000432553	3.12366	0.00513506	0.260936	0.561909	0.716078	0.154169
cg00039998	0.23182	0.00249512	0.000991145	2.51741	0.0200104	0.364122	0.567618	0.840594	0.272977
cg00040013	0.174793	0.00116949	0.000554505	2.10907	0.0471174	0.46	0.163316	0.322883	0.159567
cg00040646	0.193713	0.00260817	0.00116116	2.24618	0.0355782	0.42603	0.0264911	0.468795	0.442304
cg00040663	0.263483	0.000848174	0.00030945	2.74091	0.0122445	0.320848	0.816558	0.90084	0.0842821
cg00040781	0.294537	-0.00200754	0.000677987	-2.96103	0.00745618	0.284645	0.658633	0.848109	0.189476
cg00040934	0.186899	-0.000435092	0.000198034	-2.19706	0.0393779	0.437559	0.875376	0.934307	0.0589314
cg00041079	0.257837	0.000354534	0.000131258	2.70105	0.0133788	0.327874	0.922542	0.960871	0.0383298
cg00041083	0.324114	0.00233722	0.000736507	3.17338	0.00457745	0.256144	0.601642	0.864028	0.262386
cg00041585	0.322864	-0.00127789	0.000403843	-3.16433	0.00467443	0.257087	0.782748	0.906903	0.124155
cg00042080	0.280485	-0.000208361	7.28235e-05	-2.86117	0.00935039	0.30016	0.957707	0.978694	0.0209871
cg00042186	0.248148	0.00078376	0.000297704	2.63269	0.015559	0.339615	0.0779817	0.178626	0.100644
cg00042205	0.183508	0.000276826	0.000127422	2.17251	0.0414118	0.443169	0.93387	0.966883	0.0330134
cg00042254	0.18289	0.00105029	0.000484446	2.16803	0.0417935	0.444284	0.768025	0.899159	0.131134
cg00042837	0.296449	0.0039946	0.00134288	2.97466	0.00722815	0.283012	0.177852	0.646652	0.468799
cg00043005	0.196783	-0.000739343	0.000325956	-2.26823	0.0339842	0.42023	0.865338	0.959327	0.0939892
cg00043069	0.266672	0.00192582	0.000696895	2.76344	0.0116444	0.317201	0.307276	0.576225	0.268949
cg00043361	0.290351	0.000818897	0.00027937	2.93123	0.00797905	0.288621	0.879098	0.964181	0.085083
cg00043599	0.283378	0.00135145	0.000468976	2.88169	0.00892694	0.296677	0.295509	0.436721	0.141212
cg00043673	0.18415	-0.000384525	0.000176618	-2.17716	0.0410193	0.442045	0.0664804	0.121205	0.0547247
cg00043800	0.328535	0.00175919	0.000548813	3.20545	0.00424945	0.252137	0.635764	0.801473	0.165709
cg00044103	0.293074	0.00138804	0.000470425	2.95061	0.00763512	0.285794	0.40875	0.578477	0.169727
cg00044497	0.22569	-0.000412797	0.000166851	-2.47405	0.0219743	0.372849	0.905382	0.948747	0.0433648
cg00044501	0.173698	-0.000419541	0.000199681	-2.10106	0.0478863	0.461966	0.612384	0.667535	0.0551516
cg00045016	0.227346	-0.00101189	0.000407073	-2.48577	0.0214264	0.370393	0.0585971	0.175029	0.116432
cg00045114	0.174016	0.000395948	0.000188243	2.10338	0.0476616	0.461419	0.891565	0.949053	0.0574884
cg00045118	0.268194	0.00125402	0.00045203	2.77419	0.011368	0.315696	0.782233	0.917058	0.134825
cg00045227	0.22875	-0.0024796	0.000993548	-2.4957	0.0209721	0.36858	0.332423	0.586018	0.253595
cg00045248	0.249037	-0.000630136	0.000238782	-2.63896	0.0153457	0.338367	0.865361	0.955117	0.0897559
cg00045439	0.197622	0.000234009	0.000102895	2.27425	0.0335603	0.418669	0.0215004	0.049093	0.0275926
cg00046914	0.271209	-0.000833268	0.000298074	-2.79551	0.0108383	0.312611	0.520374	0.630957	0.110584
cg00047532	0.206447	-0.0016815	0.000719403	-2.33736	0.0294016	0.402991	0.528565	0.734583	0.206018
cg00047749	0.287237	0.000540888	0.00018593	2.90909	0.00839013	0.292494	0.892642	0.942133	0.0494911
cg00047843	0.183237	-0.00135044	0.000622166	-2.17054	0.0415788	0.443559	0.471046	0.613596	0.142549
cg00048149	0.394889	0.0026739	0.000722298	3.70194	0.001322	0.201026	0.608255	0.830834	0.222579
cg00048370	0.182102	0.00143665	0.000664408	2.16231	0.042285	0.445707	0.135564	0.313997	0.178433
cg00048436	0.226192	0.00032314	0.000130424	2.4776	0.0218066	0.372147	0.918895	0.953828	0.0349338
cg00048705	0.184967	-0.000202903	9.29437e-05	-2.18308	0.0405247	0.440674	0.947796	0.979754	0.0319585
cg00048743	0.173146	0.00199757	0.000952576	2.09702	0.0482783	0.462906	0.157878	0.403597	0.245719
cg00049380	0.303496	0.000685644	0.00022666	3.02499	0.0064427	0.27539	0.863023	0.934797	0.0717744
cg00049595	0.220601	-0.000815989	0.000334696	-2.438	0.0237423	0.380614	0.0531222	0.140719	0.0875964
cg00050654	0.29767	0.00147959	0.000495945	2.98337	0.00708593	0.28181	0.783398	0.928499	0.145101
cg00050692	0.201264	-0.00140238	0.000609644	-2.30033	0.0317801	0.412287	0.734531	0.899748	0.165216
cg00051022	0.271786	-0.000430282	0.000153695	-2.79958	0.0107397	0.311708	0.91529	0.967621	0.0523313
cg00051704	0.288378	-0.000471155	0.000161509	-2.9172	0.0082372	0.291116	0.884619	0.926249	0.04163
cg00052472	0.380311	0.00110759	0.000308524	3.58998	0.00172397	0.211581	0.835914	0.931067	0.0951532
cg00052487	0.252989	0.00173905	0.000652103	2.66684	0.0144309	0.333541	0.798081	0.959175	0.161094
cg00052550	0.222681	0.000165669	6.75446e-05	2.45274	0.0230038	0.377399	0.0266431	0.0507655	0.0241224
cg00053292	0.233507	-0.000585228	0.000231377	-2.52933	0.0194999	0.361687	0.0509418	0.129189	0.0782468
cg00053647	0.201051	0.000206209	8.97022e-05	2.29881	0.0318813	0.412643	0.0365408	0.0626546	0.0261139
cg00053769	0.197828	-0.000494709	0.000217385	-2.27572	0.0334574	0.418343	0.869483	0.948071	0.0785882
cg00053839	0.194492	0.000286712	0.000127327	2.25177	0.0351673	0.424614	0.924331	0.962787	0.0384564
cg00054209	0.202361	-0.000615562	0.000266687	-2.30818	0.0312615	0.410394	0.29517	0.362769	0.0675999
cg00054771	0.223763	0.000860835	0.000349875	2.4604	0.0226285	0.375849	0.100239	0.237443	0.137204
cg00054890	0.31468	0.00120137	0.000386883	3.10525	0.00535777	0.26311	0.790251	0.920949	0.130698
cg00055073	0.186157	0.00143843	0.000656312	2.19169	0.0398145	0.43874	0.681271	0.88013	0.198859
cg00055233	0.341899	0.00094694	0.000286688	3.30303	0.00338578	0.241234	0.337311	0.446107	0.108795
cg00055486	0.370046	0.00182738	0.000520291	3.51223	0.0020717	0.218292	0.794578	0.946944	0.152366
cg00055595	0.205713	0.000201678	8.64782e-05	2.33213	0.0297276	0.404412	0.0623511	0.0901048	0.0277537
cg00055747	0.183053	0.00168776	0.000778056	2.16921	0.0416927	0.443936	0.536771	0.746172	0.209401
cg00055945	0.339466	0.00207709	0.000632261	3.28518	0.00352979	0.243257	0.127287	0.303423	0.176136
cg00056433	0.197767	0.00181787	0.000798962	2.27529	0.033488	0.418456	0.0947532	0.3451	0.250347
cg00056563	0.273458	0.00230348	0.00081933	2.81141	0.0104584	0.309036	0.209787	0.451207	0.24142
cg00057114	0.226252	-0.000164568	6.64109e-05	-2.47803	0.0217867	0.372072	0.934364	0.951749	0.0173847
cg00057324	0.195616	0.00247621	0.00109574	2.25985	0.034582	0.422293	0.628398	0.91771	0.289311
cg00057476	0.36	-0.00146009	0.000424822	-3.43693	0.00247381	0.226132	0.268227	0.402728	0.134501
cg00057569	0.197933	0.000657199	0.000288691	2.27648	0.033405	0.41817	0.0292396	0.12614	0.0969001
cg00057700	0.207739	0.000184938	7.88118e-05	2.34658	0.0288356	0.400905	0.0291685	0.049652	0.0204835
cg00057880	0.284089	0.000414302	0.000143519	2.88674	0.00882574	0.296049	0.0371736	0.0815823	0.0444087
cg00058061	0.211964	-0.000218936	9.21189e-05	-2.37666	0.0270574	0.393978	0.933342	0.965535	0.0321935
cg00058449	0.208745	-0.00141135	0.000599621	-2.35374	0.0284026	0.399116	0.782955	0.937796	0.154841
cg00058490	0.22318	0.00156261	0.00063617	2.45628	0.0228298	0.376673	0.705401	0.889801	0.1844
cg00058522	0.182573	0.00152964	0.000706295	2.16573	0.0419904	0.444774	0.331272	0.563816	0.232544
cg00058696	0.212136	0.00127676	0.000536929	2.37789	0.0269871	0.39376	0.462036	0.619611	0.157576
cg00058708	0.227119	0.000753937	0.000303497	2.48416	0.0215006	0.370636	0.111681	0.210982	0.0993016
cg00058938	0.350603	0.00129194	0.000383691	3.36715	0.00291417	0.234564	0.193236	0.307321	0.114086
cg00059225	0.483127	0.00120759	0.000272566	4.43045	0.000232145	0.155304	0.152784	0.263507	0.110723
cg00059762	0.182395	-0.00067946	0.000313921	-2.16443	0.0421015	0.445119	0.737532	0.824974	0.087442
cg00059874	0.173055	0.000920263	0.000438983	2.09635	0.0483432	0.463132	0.347084	0.473659	0.126575
cg00059879	0.1762	-0.000274237	0.000129397	-2.11935	0.0461473	0.457256	0.928135	0.965104	0.0369692
cg00060475	0.234812	0.00288048	0.00113469	2.53855	0.0191134	0.359751	0.535761	0.976813	0.441052
cg00060484	0.253819	-0.000996405	0.000372809	-2.6727	0.0142454	0.332486	0.497826	0.591806	0.0939792
cg00060649	0.261781	0.00198746	0.000728303	2.72889	0.0125765	0.323098	0.387569	0.628296	0.240727
cg00060796	0.404417	0.002549	0.000675021	3.77618	0.00110807	0.19504	0.49321	0.747063	0.253853
cg00060800	0.179388	0.00216712	0.00101145	2.14258	0.0440202	0.451102	0.288212	0.616519	0.328306
cg00060827	0.300279	-0.00110933	0.00036953	-3.00199	0.00679085	0.27889	0.639941	0.74725	0.107309
cg00060843	0.17867	0.000634339	0.000296787	2.13735	0.044491	0.452857	0.851353	0.95158	0.100227
cg00061413	0.222301	-0.00082569	0.00033701	-2.45005	0.0231372	0.378084	0.0655364	0.167756	0.102219
cg00061520	0.268156	0.000787779	0.000283995	2.77392	0.0113749	0.315722	0.847222	0.928492	0.0812706
cg00061575	0.256413	0.000335951	0.000124842	2.691	0.01368	0.329745	0.0240782	0.0657588	0.0416806
cg00061805	0.202806	-0.00113418	0.0004907	-2.31136	0.0310539	0.409531	0.723234	0.884743	0.161508
cg00061956	0.185931	-0.0015568	0.000710847	-2.19006	0.0399482	0.439001	0.179216	0.426099	0.246883
cg00062151	0.286677	0.00142942	0.000492034	2.90512	0.00846604	0.292909	0.459374	0.639809	0.180435
cg00062282	0.438845	0.00227999	0.000562612	4.0525	0.0005731	0.17777	0.380214	0.559211	0.178997
cg00062437	0.351452	-0.00116974	0.000346751	-3.37343	0.00287156	0.233931	0.0817413	0.194342	0.1126
cg00062873	0.18895	-0.000329975	0.000149184	-2.21187	0.0381947	0.433973	0.922299	0.969542	0.0472437
cg00063223	0.267535	0.00235413	0.00085001	2.76953	0.0114869	0.316331	0.528689	0.789939	0.26125
cg00063279	0.364503	0.00084365	0.000243086	3.47059	0.00228541	0.222781	0.061642	0.14436	0.0827177
cg00063392	0.310227	0.00257077	0.000836501	3.07324	0.00576752	0.268158	0.363983	0.611413	0.24743
cg00063703	0.391676	0.000904521	0.000245988	3.6771	0.00140231	0.20334	0.0797603	0.150999	0.0712382
cg00063828	0.19343	0.00151778	0.000676331	2.24414	0.0357287	0.426508	0.121621	0.306954	0.185333
cg00063979	0.247163	-0.000270034	0.000102841	-2.62573	0.0157986	0.341144	0.936505	0.964851	0.0283463
cg00064408	0.218556	0.000919968	0.000379604	2.4235	0.0244902	0.383633	0.739	0.851937	0.112938
cg00064464	0.25173	-0.000738781	0.000277951	-2.65796	0.0147166	0.334671	0.59885	0.685432	0.0865826
cg00064589	0.386456	-0.00320864	0.000882236	-3.63694	0.00154247	0.206476	0.650901	0.947697	0.296796
cg00065396	0.19113	0.00151745	0.000681209	2.22758	0.0369752	0.430479	0.565357	0.767614	0.202257
cg00065419	0.214124	0.00101944	0.000426185	2.39202	0.0261892	0.390557	0.273924	0.384976	0.111052
cg00065726	0.173147	0.000171251	8.16636e-05	2.09702	0.0482775	0.462906	0.0273563	0.0499526	0.0225963
cg00065764	0.198478	0.00139303	0.000610876	2.28038	0.0331337	0.417191	0.294539	0.468234	0.173696
cg00065935	0.305971	0.000364579	0.00011982	3.04272	0.00618626	0.272772	0.047411	0.0807963	0.0333853
cg00066249	0.227294	-0.000858765	0.000345523	-2.4854	0.0214432	0.370443	0.843875	0.950958	0.107083
cg00066750	0.183482	0.000582917	0.000268338	2.17232	0.0414277	0.443175	0.835196	0.914744	0.0795479
cg00066805	0.250993	0.00355653	0.00134069	2.65275	0.0148864	0.33569	0.406854	0.929938	0.523084
cg00066832	0.208928	0.00228557	0.000970497	2.35505	0.0283243	0.398746	0.369946	0.626215	0.256269
cg00067058	0.204048	-0.000494075	0.000212941	-2.32024	0.0304802	0.407414	0.888518	0.945925	0.0574063
cg00067126	0.189356	-0.000218942	9.8854e-05	-2.2148	0.0379647	0.433412	0.0320414	0.0631877	0.0311463
cg00067274	0.273964	0.00221583	0.000787155	2.81499	0.0103748	0.308504	0.475525	0.699729	0.224204
cg00067414	0.259389	0.00136096	0.000501829	2.71201	0.0130574	0.326082	0.129386	0.282917	0.153531
cg00067588	0.215132	-0.000301414	0.000125632	-2.39918	0.0257934	0.388894	0.91392	0.949178	0.0352576
cg00067702	0.257653	0.00130362	0.000482868	2.69975	0.0134173	0.328239	0.507913	0.667596	0.159683
cg00068155	0.306416	0.000459086	0.000150723	3.0459	0.00614127	0.272313	0.0465635	0.105639	0.0590756
cg00068265	0.211984	-0.0002748	0.000115617	-2.37681	0.0270492	0.393935	0.937287	0.969226	0.0319393
cg00068305	0.226398	0.000223637	9.02105e-05	2.47906	0.0217384	0.371837	0.0340397	0.0588282	0.0247885
cg00068408	0.174008	0.000247703	0.000117767	2.10332	0.0476676	0.46142	0.0289343	0.0614842	0.0325499
cg00068503	0.273993	0.000246487	8.75556e-05	2.8152	0.0103698	0.308504	0.0522616	0.0816169	0.0293553
cg00068622	0.197651	0.000348876	0.000153389	2.27446	0.0335458	0.418663	0.0450447	0.0871267	0.0420819
cg00068745	0.171763	-0.000612438	0.000293471	-2.08688	0.0492744	0.465934	0.044762	0.133156	0.0883938
cg00069463	0.193702	0.00167327	0.000744969	2.2461	0.0355843	0.426066	0.583243	0.78483	0.201587
cg00069658	0.235015	0.00210971	0.000830602	2.53998	0.0190541	0.359492	0.466884	0.688813	0.22193
cg00070460	0.263233	0.00148424	0.000541864	2.73914	0.0122927	0.321155	0.508196	0.665518	0.157322
cg00070678	0.321512	0.00209847	0.000665219	3.15455	0.0047814	0.258167	0.655247	0.852093	0.196847
cg00070753	0.282717	-0.0030609	0.00106392	-2.877	0.00902213	0.297817	0.302099	0.63893	0.336831
cg00070908	0.246818	-0.000186398	7.10548e-05	-2.6233	0.0158832	0.341728	0.965514	0.983592	0.0180781
cg00071137	0.256808	0.00233307	0.000866095	2.69379	0.0135958	0.329257	0.229513	0.486083	0.25657
cg00071554	0.239692	0.00233177	0.000906242	2.57301	0.0177318	0.352218	0.621983	0.91156	0.289577
cg00071596	0.173688	-0.0023512	0.00111909	-2.10098	0.0478932	0.461998	0.400978	0.684311	0.283332
cg00071872	0.221162	0.00173658	0.000711139	2.44198	0.0235409	0.379791	0.16815	0.347934	0.179783
cg00072158	0.175115	-0.000267939	0.0001269	-2.11142	0.0468938	0.459405	0.920195	0.958801	0.0386058
cg00072426	0.311642	0.00104094	0.000337595	3.08341	0.00563421	0.266482	0.416918	0.52931	0.112391
cg00072675	0.207913	0.00154419	0.000657716	2.34781	0.0287605	0.400601	0.723068	0.902828	0.17976
cg00073090	0.203402	0.00164804	0.000711704	2.31562	0.0307774	0.408504	0.251591	0.454818	0.203227
cg00073299	0.270162	0.000714964	0.000256434	2.7881	0.0110195	0.313469	0.872915	0.954464	0.0815488
cg00073322	0.198748	0.000881735	0.000386333	2.28232	0.033	0.416699	0.797648	0.909935	0.112287
cg00073706	0.205791	-0.000679151	0.000291146	-2.33268	0.0296926	0.404283	0.785151	0.879645	0.0944931
cg00073968	0.384271	-0.000298281	8.23933e-05	-3.62021	0.00160486	0.20844	0.953342	0.986332	0.0329908
cg00074091	0.203557	0.00156902	0.000677256	2.31673	0.0307057	0.40828	0.511748	0.700477	0.188729
cg00074198	0.208862	0.000289872	0.00012311	2.35458	0.0283525	0.398921	0.931744	0.965058	0.033314
cg00074313	0.182094	-0.00024865	0.000114996	-2.16225	0.0422898	0.445707	0.934352	0.965115	0.0307628
cg00074348	0.22376	0.000980715	0.000398602	2.46038	0.0226295	0.375849	0.734938	0.834525	0.0995875
cg00074585	0.193295	0.000555033	0.000247432	2.24317	0.0358009	0.426799	0.868881	0.942639	0.0737578
cg00074785	0.30317	-0.000778584	0.000257583	-3.02266	0.00647726	0.275727	0.812306	0.916289	0.103983
cg00075383	0.177645	-0.0016337	0.000767035	-2.12989	0.0451713	0.454606	0.676922	0.872221	0.195299
cg00075468	0.256541	0.000949985	0.000352904	2.6919	0.0136526	0.329629	0.478238	0.580436	0.102198
cg00076044	0.178766	-0.000298004	0.000139381	-2.13805	0.0444277	0.452612	0.915909	0.961033	0.0451242
cg00076365	0.245427	0.00141702	0.000542194	2.61349	0.016229	0.343899	0.145247	0.299024	0.153777
cg00076612	0.37087	0.00168559	0.000479072	3.51844	0.00204156	0.217371	0.457084	0.616877	0.159793
cg00076797	0.422864	0.0011916	0.00030378	3.92257	0.000781672	0.184949	0.822626	0.929585	0.106958
cg00077044	0.339523	0.00187027	0.000569232	3.2856	0.00352635	0.24317	0.614528	0.849265	0.234737
cg00077264	0.368908	0.00215461	0.000614959	3.50366	0.00211402	0.219448	0.640491	0.832356	0.191865
cg00077391	0.234631	0.00167392	0.000659733	2.53727	0.0191668	0.359972	0.708872	0.904102	0.19523
cg00077477	0.218147	0.00270276	0.00111657	2.42059	0.0246425	0.384251	0.490554	0.809611	0.319057
cg00077904	0.414751	0.00366354	0.000949659	3.85774	0.000912406	0.190381	0.40706	0.744606	0.337547
cg00078121	0.182151	-0.00160126	0.00074041	-2.16266	0.0422541	0.445638	0.527465	0.790455	0.26299
cg00078130	0.440544	0.000360032	8.8536e-05	4.06651	0.000554235	0.176837	0.041576	0.070542	0.028966
cg00078259	0.192301	0.00146679	0.000655981	2.23602	0.0363354	0.42866	0.682964	0.86364	0.180676
cg00078334	0.540403	0.0036206	0.000728619	4.96912	6.4473e-05	0.124369	0.087096	0.343597	0.256501
cg00078746	0.223837	-0.000475139	0.000193073	-2.46093	0.022603	0.375768	0.903624	0.952885	0.0492612
cg00079019	0.270744	0.00143798	0.000514994	2.79222	0.0109184	0.313077	0.337021	0.504585	0.167564
cg00079169	0.315355	-0.000597192	0.000192016	-3.11012	0.00529799	0.262317	0.911312	0.9758	0.0644881
cg00079784	0.199209	0.00143768	0.00062901	2.28562	0.0327733	0.415785	0.746145	0.922779	0.176635
cg00080123	0.185576	0.000207599	9.49029e-05	2.18748	0.0401598	0.439667	0.013012	0.045755	0.032743
cg00080125	0.269808	0.00206687	0.000741983	2.7856	0.0110815	0.313883	0.563494	0.812921	0.249428
cg00080417	0.215038	0.00135576	0.000565248	2.39852	0.0258298	0.388958	0.705477	0.883736	0.178259
cg00080663	0.221754	0.001026	0.000419429	2.44617	0.0233301	0.378984	0.276133	0.415245	0.139112
cg00080816	0.45528	0.00260014	0.000620633	4.1895	0.000413012	0.167851	0.666555	0.883366	0.216812
cg00081084	0.295771	-0.000981336	0.000330436	-2.96982	0.00730826	0.283563	0.821331	0.931942	0.110611
cg00081098	0.209746	-0.00188765	0.000799554	-2.36088	0.0279774	0.39743	0.637589	0.853377	0.215788
cg00081324	0.381853	0.00101082	0.000280647	3.60173	0.00167666	0.21031	0.312117	0.412349	0.100232
cg00081417	0.424569	0.0038652	0.000981939	3.93629	0.000756492	0.18435	0.254537	0.577179	0.322642
cg00081666	0.31388	0.000156019	5.03367e-05	3.0995	0.00542926	0.263572	0.0333358	0.0485134	0.0151776
cg00081799	0.247544	0.00259173	0.00098604	2.62842	0.0157055	0.340392	0.633081	0.914809	0.281728
cg00081919	0.255061	0.00178066	0.000664064	2.68146	0.0139721	0.331076	0.419065	0.636414	0.21735
cg00081940	0.191191	0.00123197	0.000552942	2.22803	0.0369412	0.430344	0.754823	0.912395	0.157572
cg00082012	0.250228	0.00131192	0.000495556	2.64736	0.0150645	0.336811	0.481946	0.641271	0.159325
cg00082132	0.393734	0.00181277	0.000490867	3.693	0.00135036	0.20228	0.13762	0.297893	0.160273
cg00082939	0.299663	-0.00309387	0.00103212	-2.99759	0.0068595	0.279466	0.507341	0.862029	0.354687
cg00083046	0.291799	0.00263718	0.000896533	2.94153	0.00779441	0.287267	0.357065	0.591215	0.234149
cg00083067	0.484316	-0.00316701	0.000713127	-4.44101	0.000226364	0.154211	0.60588	0.848594	0.242714
cg00083068	0.256063	-0.002812	0.00104592	-2.68853	0.013755	0.330248	0.519507	0.793938	0.274431
cg00083801	0.322464	-0.00214137	0.000677342	-3.16143	0.00470581	0.257557	0.743697	0.944785	0.201088
cg00083848	0.474851	0.000299974	6.88393e-05	4.3576	0.000276297	0.158163	0.0495679	0.0715991	0.0220311
cg00084202	0.183144	0.000735586	0.000339	2.16987	0.0416362	0.443714	0.385597	0.466063	0.0804652
cg00085122	0.184606	0.000286979	0.000131614	2.18046	0.0407427	0.441288	0.0377633	0.0850665	0.0473032
cg00085493	0.225746	0.00129671	0.00052404	2.47445	0.0219554	0.37276	0.199374	0.374255	0.17488
cg00085800	0.180413	0.000223618	0.000104006	2.15004	0.043357	0.44922	0.0310886	0.0688213	0.0377326
cg00085819	0.283116	0.00220434	0.000765439	2.87983	0.00896461	0.297205	0.10447	0.315266	0.210796
cg00086383	0.176057	0.000853155	0.000402754	2.1183	0.0462451	0.457573	0.798894	0.901456	0.102562
cg00086429	0.250561	-0.000646757	0.000244086	-2.64971	0.0149865	0.336387	0.648108	0.720905	0.072797
cg00086869	0.433728	0.00225668	0.000562685	4.01057	0.00063352	0.180148	0.734531	0.909659	0.175129
cg00086921	0.171366	0.00261716	0.00125585	2.08397	0.0495641	0.466741	0.308788	0.648884	0.340095
cg00086995	0.220181	0.00120207	0.000493659	2.43502	0.0238943	0.381242	0.702913	0.845803	0.14289
cg00087195	0.180103	9.4293e-05	4.39025e-05	2.14778	0.0435565	0.449749	0.0158853	0.0285785	0.0126932
cg00087244	0.283357	-0.00209595	0.000727372	-2.88154	0.00892998	0.29673	0.294586	0.496945	0.202358
cg00087316	0.195755	0.00207511	0.000917843	2.26085	0.0345099	0.422013	0.398789	0.719585	0.320796
cg00087417	0.28847	0.00163976	0.000561975	2.91785	0.00822503	0.290993	0.104814	0.257747	0.152934
cg00087425	0.243205	0.0018284	0.000703824	2.5978	0.0167966	0.347232	0.0666365	0.256403	0.189766
cg00087511	0.266079	-0.000404105	0.000146455	-2.75925	0.0117539	0.318063	0.916834	0.950593	0.0337598
cg00087906	0.414593	0.00342754	0.000888774	3.85648	0.000915152	0.190427	0.0728795	0.342425	0.269546
cg00088007	0.25562	0.00162473	0.000605022	2.6854	0.0138506	0.330704	0.30188	0.476069	0.174189
cg00088148	0.171303	0.000674835	0.000323895	2.0835	0.0496107	0.466825	0.823707	0.924015	0.100308
cg00088282	0.237261	0.00213767	0.000836382	2.55585	0.0184079	0.355817	0.0496789	0.270931	0.221252
cg00088483	0.200345	0.00110296	0.000480852	2.29376	0.0322206	0.413967	0.777699	0.891505	0.113806
cg00088688	0.325931	0.00163927	0.000514435	3.18655	0.0044399	0.254039	0.225009	0.38586	0.160851
cg00088844	0.184539	0.00095398	0.00043761	2.17998	0.040783	0.441428	0.0811221	0.206643	0.125521
cg00088972	0.207902	0.000628422	0.000267671	2.34774	0.028765	0.400622	0.842425	0.929454	0.0870294
cg00089100	0.317134	-0.00278924	0.000893147	-3.12294	0.00514363	0.260981	0.354762	0.599286	0.244523
cg00089219	0.474866	0.00134073	0.000307666	4.35772	0.000276214	0.158163	0.795647	0.911972	0.116326
cg00089695	0.227192	0.00147428	0.000593349	2.48468	0.0214766	0.37054	0.762096	0.94326	0.181164
cg00089823	0.289196	0.00148577	0.000508302	2.92301	0.00812933	0.289807	0.225805	0.39593	0.170125
cg00089960	0.201159	-0.000486875	0.000211723	-2.29958	0.0318302	0.412457	0.907684	0.969466	0.0617828
cg00089966	0.367701	0.00211013	0.000603828	3.49459	0.00215974	0.220502	0.459143	0.685698	0.226556
cg00090452	0.173704	-0.000478685	0.000227826	-2.1011	0.0478821	0.461964	0.860853	0.920571	0.0597177
cg00090591	0.182894	-0.00139664	0.000644192	-2.16805	0.0417911	0.444279	0.326937	0.522159	0.195222
cg00090648	0.264596	0.000636944	0.00023172	2.74877	0.0120319	0.319534	0.0262876	0.0890391	0.0627515
cg00090782	0.18752	-0.00157265	0.000714337	-2.20155	0.0390158	0.436348	0.237719	0.475251	0.237532
cg00090809	0.425338	-0.000927235	0.00023519	-3.94249	0.000745371	0.184067	0.807763	0.894295	0.086532
cg00090865	0.266828	0.000680193	0.000246042	2.76454	0.0116158	0.317022	0.0471586	0.134536	0.0873779
cg00091004	0.178469	0.000332034	0.000155454	2.13589	0.0446234	0.453267	0.904736	0.952331	0.0475948
cg00091263	0.210748	0.00130851	0.000552577	2.36801	0.0275581	0.395991	0.441454	0.6148	0.173346
cg00091302	0.294549	0.00226981	0.000766539	2.96111	0.00745469	0.284628	0.541354	0.758748	0.217394
cg00091633	0.229763	0.000961596	0.000384198	2.50286	0.02065	0.367147	0.361317	0.491006	0.129689
cg00092052	0.222008	-0.00192131	0.000784859	-2.44797	0.0232402	0.378573	0.479325	0.696329	0.217004
cg00092151	0.366806	-0.00100029	0.000286793	-3.48786	0.00219426	0.221273	0.680536	0.760264	0.0797279
cg00092427	0.328436	0.0027441	0.000856267	3.20473	0.00425654	0.252193	0.1969	0.442844	0.245944
cg00092518	0.199154	0.00040904	0.000178993	2.28523	0.0328	0.415871	0.0586123	0.116527	0.0579146
cg00092551	0.353275	0.000822675	0.000242897	3.38693	0.00278209	0.231926	0.886362	0.960707	0.0743449
cg00092711	0.266423	-0.000989004	0.000358118	-2.76168	0.0116903	0.317582	0.524134	0.627642	0.103509
cg00092943	0.376732	-0.00204613	0.000574307	-3.56278	0.00183855	0.21346	0.385346	0.564789	0.179443
cg00093057	0.335256	0.00271444	0.000834085	3.25439	0.00379239	0.246662	0.564072	0.788659	0.224587
cg00093080	0.217325	0.000600728	0.000248773	2.41476	0.0249512	0.385629	0.899741	0.971486	0.0717444
cg00093643	0.429766	0.0023045	0.000579265	3.97831	0.00068426	0.181965	0.650482	0.858846	0.208364
cg00093815	0.187565	0.000172774	7.84669e-05	2.20187	0.0389897	0.43632	0.0336142	0.0576325	0.0240182
cg00094177	0.232379	0.000910879	0.000361265	2.52136	0.0198398	0.363159	0.786141	0.888203	0.102062
cg00094226	0.229195	-0.000568815	0.000227631	-2.49885	0.02083	0.367839	0.868634	0.935371	0.066737
cg00094487	0.20504	-0.000586274	0.000251909	-2.32732	0.0300299	0.405513	0.88725	0.95387	0.0666204
cg00094518	0.304608	0.000621407	0.000204885	3.03295	0.00632634	0.274196	0.0515058	0.129003	0.0774972
cg00094538	0.21076	0.00100764	0.000425507	2.36809	0.0275533	0.395988	0.644187	0.766558	0.122371
cg00094595	0.658826	0.00127453	0.000200144	6.36806	2.58942e-06	0.0790472	0.0214268	0.113457	0.0920306
cg00094764	0.248517	-0.0015485	0.000587603	-2.63529	0.0154702	0.339186	0.341096	0.54519	0.204094
cg00094998	0.203133	0.0010782	0.000466008	2.3137	0.0309019	0.408881	0.567474	0.717249	0.149775
cg00095138	0.257723	0.00259818	0.0009622	2.70025	0.0134025	0.328113	0.452524	0.716511	0.263988
cg00095214	0.177945	-0.000910758	0.00042717	-2.13207	0.0449712	0.454159	0.706274	0.82017	0.113896
cg00095658	0.19581	0.00224025	0.000990717	2.26124	0.0344818	0.421953	0.647787	0.916464	0.268677
cg00095772	0.173919	-0.00321547	0.00152923	-2.10267	0.0477304	0.461512	0.490128	0.93144	0.441312
cg00095976	0.172376	0.000198699	9.50089e-05	2.09137	0.0488306	0.464559	0.0311059	0.0589621	0.0278562
cg00096065	0.394189	-0.00278008	0.000752081	-3.69652	0.00133912	0.201736	0.682951	0.951922	0.268971
cg00096458	0.192124	-0.00210581	0.000942301	-2.23475	0.0364312	0.428944	0.418716	0.695438	0.276723
cg00096747	0.182231	0.000872612	0.000403381	2.16324	0.042204	0.445446	0.415598	0.518656	0.103057
cg00096845	0.213033	0.000482345	0.000202303	2.38427	0.0266243	0.392291	0.0215662	0.0709289	0.0493627
cg00097340	0.180417	-0.000359231	0.000167079	-2.15007	0.0433542	0.44922	0.917737	0.96844	0.0507026
cg00097626	0.314087	0.000234052	7.54766e-05	3.10099	0.00541069	0.263408	0.0169744	0.0426675	0.0256931
cg00097800	0.260325	0.000929949	0.000342067	2.71861	0.0128672	0.325202	0.858806	0.961356	0.10255
cg00097818	0.376574	0.00161054	0.000452199	3.56157	0.00184379	0.213542	0.49229	0.659546	0.167255
cg00098297	0.259002	0.000730479	0.000269621	2.70927	0.0131368	0.326678	0.86168	0.950187	0.0885064
cg00098726	0.175692	0.0011016	0.000520697	2.11563	0.0464957	0.458392	0.714808	0.867684	0.152877
cg00098985	0.203561	0.00108539	0.000468493	2.31676	0.0307039	0.40828	0.800266	0.936214	0.135948
cg00099306	0.361227	-0.000686396	0.000199181	-3.44609	0.00242109	0.22551	0.869748	0.931815	0.0620675
cg00099350	0.192479	0.00306929	0.00137187	2.2373	0.0362389	0.428341	0.0898786	0.488364	0.398486
cg00099755	0.346352	-0.00169484	0.000508082	-3.33577	0.00313635	0.238439	0.764824	0.913127	0.148303
cg00099790	0.322061	-0.00119233	0.000377497	-3.15852	0.0047377	0.257815	0.140007	0.254804	0.114797
cg00100158	0.200327	0.00136924	0.000596977	2.29363	0.0322291	0.413979	0.719499	0.892618	0.173119
cg00100361	0.590808	-0.00414186	0.000752187	-5.50642	1.83186e-05	0.103772	0.553863	0.874127	0.320264
cg00100436	0.248538	0.000276285	0.000104835	2.63544	0.0154651	0.339173	0.0225309	0.0592063	0.0366755
cg00101164	0.314118	0.00145534	0.00046928	3.10121	0.00540794	0.263408	0.763106	0.908244	0.145138
cg00101235	0.427333	0.00216094	0.000545885	3.9586	0.000717251	0.182832	0.532609	0.703075	0.170466
cg00101457	0.31809	0.00316093	0.00100994	3.12983	0.00506247	0.260212	0.550205	0.885022	0.334817
cg00101675	0.248618	-0.000489964	0.000185874	-2.636	0.0154458	0.339052	0.903436	0.962286	0.0588501
cg00101728	0.340912	0.00145915	0.000442731	3.29579	0.00344352	0.241842	0.230446	0.342956	0.11251
cg00101940	0.175307	0.00229484	0.00108615	2.11282	0.0467608	0.45904	0.470917	0.914005	0.443087
cg00102711	0.325434	0.00190617	0.000598872	3.18294	0.00447717	0.254599	0.387036	0.601547	0.214511
cg00102731	0.170972	-0.000781988	0.000375762	-2.08107	0.0498534	0.46746	0.212205	0.319029	0.106823
cg00102996	0.298472	0.00152033	0.000508627	2.98909	0.00699403	0.281091	0.0689222	0.201409	0.132487
cg00103236	0.356438	-0.00232537	0.000681844	-3.41041	0.00263292	0.229221	0.41741	0.631741	0.214331
cg00103398	0.270172	-0.00273498	0.000980922	-2.78817	0.0110178	0.313451	0.442545	0.755646	0.313101
cg00103785	0.207296	0.000528464	0.00022551	2.34341	0.0290288	0.401703	0.0738445	0.13533	0.0614853
cg00104059	0.20639	0.000994661	0.000425623	2.33695	0.0294269	0.403105	0.745815	0.860941	0.115126
cg00104249	0.273443	0.00151493	0.000538873	2.8113	0.010461	0.309036	0.396136	0.551943	0.155806
cg00104984	0.319683	0.00113391	0.000360965	3.14133	0.00492972	0.258827	0.819298	0.937933	0.118635
cg00105060	0.24489	0.00161431	0.000618583	2.60969	0.0163646	0.344608	0.582626	0.787915	0.205289
cg00105102	0.318171	-0.00311304	0.00099445	-3.13042	0.00505561	0.260182	0.184803	0.518224	0.333421
cg00105189	0.248177	0.00191332	0.000726699	2.63289	0.015552	0.339615	0.590976	0.836131	0.245154
cg00105229	0.28542	-0.000793577	0.000274008	-2.89619	0.008639	0.294201	0.829714	0.91789	0.088176
cg00105253	0.213372	0.00150311	0.000629792	2.38668	0.0264883	0.39167	0.12884	0.315999	0.187159
cg00105515	0.433753	-0.00114982	0.000286684	-4.01077	0.000633206	0.180148	0.837648	0.920182	0.0825333
cg00105570	0.174638	0.00140965	0.000668736	2.10793	0.0472256	0.460289	0.618736	0.785617	0.16688
cg00105628	0.306175	0.000690053	0.00022668	3.04417	0.00616563	0.272534	0.122094	0.210204	0.08811
cg00106074	0.191877	0.000210012	9.40507e-05	2.23297	0.0365655	0.429323	0.0178099	0.042178	0.0243681
cg00106302	0.31434	-0.0014009	0.000451494	-3.10281	0.00538807	0.263373	0.660412	0.818412	0.158
cg00106512	0.245295	0.00152612	0.00058415	2.61256	0.0162623	0.344113	0.568249	0.743488	0.175238
cg00106564	0.239196	0.00149846	0.00058317	2.56951	0.0178679	0.352809	0.489785	0.672927	0.183143
cg00106800	0.225406	0.00168959	0.000683479	2.47204	0.0220695	0.373384	0.551283	0.769238	0.217955
cg00107187	0.374024	0.000426953	0.000120531	3.54226	0.0019299	0.215254	0.0627373	0.104113	0.0413757
cg00107285	0.35917	-0.000950751	0.000277126	-3.43075	0.00251004	0.226768	0.818697	0.917528	0.0988311
cg00107521	0.173613	-0.00214803	0.00102266	-2.10043	0.0479467	0.462085	0.553333	0.896703	0.34337
cg00107772	0.186215	0.00018689	8.52556e-05	2.19211	0.03978	0.438647	0.0457039	0.0753243	0.0296204
cg00108569	0.193423	0.00017637	7.8593e-05	2.24409	0.0357327	0.426515	0.0246397	0.0501512	0.0255115
cg00108617	0.22488	0.000597755	0.000242171	2.46831	0.022247	0.37415	0.89984	0.9619	0.0620594
cg00108630	0.204855	0.000302311	0.000129971	2.326	0.0301135	0.405919	0.930788	0.962843	0.0320547
cg00108744	0.259091	0.00175843	0.00064889	2.7099	0.0131185	0.326579	0.606119	0.840447	0.234328
cg00108812	0.231117	0.000656209	0.000261184	2.51244	0.0202269	0.365293	0.862893	0.945591	0.0826981
cg00109076	0.313708	0.00275163	0.00088812	3.09826	0.00544478	0.263807	0.0387368	0.304228	0.265491
cg00109451	0.306709	-0.00198688	0.000651864	-3.048	0.00611171	0.272018	0.511348	0.745101	0.233753
cg00109703	0.252306	0.00173077	0.00065017	2.66202	0.0145851	0.334085	0.276688	0.473318	0.19663
cg00109923	0.350037	-0.000617394	0.000183586	-3.36296	0.00294289	0.235091	0.875312	0.938154	0.0628412
cg00110039	0.245662	-0.00341482	0.00130579	-2.61514	0.0161703	0.343448	0.31833	0.711707	0.393377
cg00110623	0.173924	0.000500568	0.000238058	2.10271	0.0477264	0.461491	0.0622517	0.1389	0.0766483
cg00110707	0.265891	0.00123959	0.000449467	2.75792	0.0117888	0.31832	0.787453	0.942797	0.155344
cg00110776	0.393314	0.000748808	0.000202942	3.68976	0.00136081	0.202539	0.893268	0.959834	0.0665663
cg00110832	0.249302	0.00219815	0.000832371	2.64083	0.0152827	0.337975	0.498037	0.741232	0.243195
cg00111466	0.349982	-0.000886008	0.000263492	-3.36256	0.00294569	0.235137	0.600649	0.673947	0.0732971
cg00111697	0.233002	0.00119054	0.000471358	2.52576	0.0196513	0.362156	0.56547	0.697746	0.132276
cg00112238	0.254295	0.00142753	0.000533445	2.67606	0.0141399	0.331664	0.470886	0.657153	0.186267
cg00112517	0.182355	0.000182033	8.41131e-05	2.16414	0.0421264	0.445211	0.0410612	0.0661677	0.0251064
cg00112790	0.204483	0.000449577	0.000193504	2.32335	0.0302819	0.406492	0.833589	0.892847	0.0592574
cg00113050	0.262429	0.00323904	0.00118496	2.73346	0.0124492	0.322281	0.227587	0.589784	0.362197
cg00113315	0.340698	0.00051479	0.000156271	3.29422	0.00345616	0.241991	0.871861	0.917579	0.0457179
cg00113554	0.18462	-0.000421269	0.000193192	-2.18057	0.0407338	0.441288	0.0251582	0.0866495	0.0614913
cg00114159	0.212326	0.00026777	0.000112544	2.37924	0.0269098	0.393413	0.929459	0.959667	0.0302073
cg00114312	0.180935	-0.00141605	0.000657455	-2.15383	0.0430228	0.448019	0.498295	0.678384	0.180089
cg00114346	0.201854	-0.0024305	0.00105465	-2.30456	0.0315002	0.411254	0.287166	0.582646	0.29548
cg00114703	0.221825	0.00208517	0.000852247	2.44667	0.0233052	0.378854	0.460428	0.707442	0.247014
cg00115113	0.203363	0.00220135	0.000950764	2.31534	0.0307953	0.408569	0.424118	0.70406	0.279942
cg00115178	0.20174	-0.00169403	0.000735338	-2.30374	0.031554	0.411592	0.10873	0.350706	0.241977
cg00115180	0.187348	0.000130593	5.93526e-05	2.2003	0.0391159	0.436688	0.0288308	0.0451707	0.01634
cg00115460	0.320274	0.00129783	0.000412586	3.1456	0.00488136	0.258805	0.74539	0.893249	0.147859
cg00115496	0.227591	0.00109023	0.000438284	2.4875	0.0213465	0.37008	0.654705	0.772795	0.11809
cg00115654	0.374397	0.00256676	0.000724035	3.54508	0.00191708	0.215011	0.235507	0.46222	0.226714
cg00116418	0.267053	-0.000228832	8.27265e-05	-2.76613	0.0115746	0.31669	0.9454	0.972024	0.0266236
cg00116616	0.311738	0.00292205	0.000947459	3.08409	0.00562532	0.266405	0.49379	0.80077	0.306981
cg00116628	0.292678	-0.000216681	7.35063e-05	-2.94779	0.00768433	0.286117	0.0412154	0.0666984	0.025483
cg00117156	0.204508	0.000700051	0.000301289	2.32352	0.0302708	0.406479	0.800732	0.899922	0.0991904
cg00117436	0.176902	-0.00269526	0.00126867	-2.12447	0.0456709	0.455821	0.380595	0.721983	0.341388
cg00117864	0.329447	-0.000281481	8.76321e-05	-3.21208	0.00418456	0.251459	0.947838	0.980811	0.0329724
cg00118317	0.182795	0.00128665	0.000593656	2.16734	0.0418524	0.444363	0.170441	0.315109	0.144668
cg00118342	0.217315	0.00196278	0.000812852	2.41469	0.0249551	0.385629	0.689448	0.946973	0.257525
cg00118471	0.21036	0.00185139	0.000782748	2.36524	0.02772	0.396369	0.645212	0.854381	0.209169
cg00119053	0.3445	0.00133554	0.000402011	3.32214	0.00323795	0.239747	0.798356	0.920176	0.121819
cg00119186	0.232825	0.000618298	0.000244918	2.52451	0.0197048	0.362432	0.874938	0.953088	0.0781493
cg00119249	0.260025	-0.00175413	0.000645734	-2.71649	0.0129279	0.325563	0.275077	0.485576	0.210498
cg00119460	0.314719	0.00231621	0.000745831	3.10554	0.00535425	0.26311	0.140166	0.395212	0.255046
cg00119964	0.20126	0.00192406	0.000836437	2.30031	0.0317818	0.412287	0.610469	0.840705	0.230236
cg00120435	0.233727	0.00194957	0.000770311	2.53088	0.0194344	0.361512	0.461373	0.669134	0.207761
cg00120721	0.20033	0.00115749	0.00050465	2.29365	0.0322276	0.413977	0.621738	0.774953	0.153215
cg00120804	0.311588	0.00231874	0.000752102	3.08301	0.00563931	0.26649	0.492686	0.78461	0.291923
cg00120887	0.311724	0.00171559	0.000556288	3.08399	0.00562661	0.266405	0.0854958	0.275216	0.18972
cg00121303	0.211998	-0.000543931	0.00022884	-2.3769	0.0270436	0.393922	0.864206	0.941266	0.0770592
cg00121389	0.172248	0.000983933	0.000470684	2.09043	0.0489232	0.464908	0.0546766	0.184545	0.129868
cg00122218	0.328354	0.00124461	0.000388439	3.20413	0.00426242	0.252234	0.433283	0.562531	0.129248
cg00122515	0.22185	-0.000173587	7.09431e-05	-2.44685	0.0232963	0.378844	0.950737	0.967938	0.0172016
cg00122765	0.198104	-0.00121937	0.00053535	-2.2777	0.0333196	0.417782	0.180841	0.350858	0.170017
cg00122968	0.200362	0.00180538	0.000787041	2.29388	0.0322125	0.413948	0.128492	0.397756	0.269265
cg00123057	0.284591	0.00131022	0.000453315	2.8903	0.00875485	0.29553	0.237867	0.394817	0.15695
cg00123089	0.198894	0.00102455	0.000448703	2.28337	0.032928	0.416384	0.811769	0.935235	0.123466
cg00123238	0.223312	-0.000332326	0.000135245	-2.45721	0.0227842	0.376487	0.916728	0.957841	0.0411125
cg00123423	0.240236	0.00358803	0.00139241	2.57685	0.0175841	0.351504	0.0677261	0.470913	0.403187
cg00123478	0.517636	0.00219287	0.000461933	4.74717	0.000109114	0.138314	0.321445	0.500413	0.178967
cg00123548	0.201161	-0.000191747	8.33828e-05	-2.2996	0.0318292	0.412457	0.946693	0.969998	0.0233047
cg00123747	0.308799	0.00283452	0.000925408	3.06299	0.005905	0.269753	0.623816	0.910586	0.28677
cg00124095	0.301553	0.00149309	0.000495861	3.0111	0.0066509	0.277405	0.45107	0.609432	0.158362
cg00124101	0.226046	0.00141148	0.000569932	2.47657	0.0218551	0.372427	0.665259	0.827374	0.162115
cg00124133	0.213351	0.00398245	0.00166872	2.38653	0.0264967	0.39167	0.297642	0.739998	0.442356
cg00124375	0.344242	0.00104455	0.000314601	3.32024	0.00325234	0.239871	0.0593306	0.162295	0.102965
cg00124774	0.285436	0.000181444	6.26468e-05	2.8963	0.00863672	0.294199	0.0123868	0.0316455	0.0192587
cg00124905	0.202387	0.000359981	0.000155946	2.30836	0.0312497	0.410359	0.0375579	0.0770329	0.039475
cg00125148	0.173605	-0.00148792	0.000708409	-2.10037	0.0479524	0.462085	0.196384	0.394256	0.197873
cg00125151	0.277976	-0.000548487	0.000192898	-2.8434	0.00973265	0.303411	0.89161	0.946747	0.0551372
cg00125205	0.251587	0.00153197	0.000576589	2.65695	0.0147495	0.334936	0.714002	0.858601	0.144599
cg00125389	0.220074	0.00174276	0.000715927	2.43426	0.0239329	0.381335	0.642116	0.897894	0.255779
cg00125768	0.299397	0.000397976	0.000132849	2.99569	0.00688932	0.279855	0.916426	0.962379	0.0459534
cg00125893	0.216103	-0.0040562	0.00168581	-2.40608	0.0254172	0.387439	0.0234388	0.500638	0.477199
cg00126034	0.248976	0.00018829	7.1362e-05	2.63853	0.0153603	0.338476	0.0373088	0.0584857	0.0211769
cg00126148	0.26787	0.002886	0.00104116	2.7719	0.0114263	0.315964	0.34069	0.706863	0.366173
cg00126261	0.239693	0.00102005	0.00039644	2.57302	0.0177318	0.352218	0.146006	0.253715	0.107708
cg00126365	0.304551	0.00300471	0.00099082	3.03255	0.00633218	0.274198	0.231636	0.522509	0.290872
cg00126946	0.238678	0.000843098	0.000328584	2.56585	0.018011	0.353515	0.839381	0.928776	0.0893952
cg00127414	0.224876	0.00178303	0.000722375	2.46829	0.0222484	0.37415	0.530926	0.729326	0.1984
cg00128100	0.293578	0.00279513	0.000946157	2.95419	0.00757312	0.285327	0.507056	0.794667	0.287612
cg00128138	0.318419	0.00152046	0.000485429	3.1322	0.00503479	0.259875	0.26364	0.401982	0.138342
cg00128195	0.244515	-0.000198183	7.60179e-05	-2.60705	0.0164597	0.345229	0.0317075	0.0515503	0.0198428
cg00128386	0.222806	0.00241569	0.000984538	2.45363	0.02296	0.377197	0.553566	0.798217	0.244651
cg00128690	0.207884	0.00139387	0.000593739	2.34761	0.0287729	0.400625	0.32536	0.531639	0.206278
cg00128804	0.265177	0.00231144	0.000839646	2.75287	0.0119223	0.319	0.560716	0.782744	0.222028
cg00129232	0.357424	-0.0049352	0.00144399	-3.41774	0.00258796	0.228554	0.384515	0.864155	0.47964
cg00129266	0.430878	-0.00300445	0.000753497	-3.98735	0.000669653	0.181765	0.271304	0.542378	0.271074
cg00129557	0.285955	0.000727754	0.000250951	2.89999	0.00856497	0.293654	0.86443	0.939506	0.0750765
cg00129651	0.3039	0.00183974	0.000607599	3.02788	0.00640021	0.275034	0.0574375	0.257725	0.200288
cg00130004	0.197661	0.00162524	0.00071454	2.27453	0.0335409	0.41864	0.414282	0.604668	0.190386
cg00130060	0.33014	0.00133917	0.000416264	3.21712	0.00413584	0.250932	0.668083	0.789461	0.121377
cg00130180	0.228058	-0.00204091	0.00081938	-2.4908	0.0211949	0.369503	0.261629	0.494632	0.233003
cg00130342	0.189185	0.00119472	0.000539726	2.21356	0.0380616	0.433687	0.451125	0.620527	0.169402
cg00130393	0.472432	-0.00304053	0.000701148	-4.33651	0.000290584	0.159064	0.472803	0.756908	0.284105
cg00130528	0.178082	0.000662016	0.000310358	2.13307	0.0448799	0.453967	0.811304	0.907395	0.0960913
cg00130684	0.225912	-0.000601566	0.000242996	-2.47562	0.0218999	0.372597	0.859221	0.937065	0.0778439
cg00130778	0.174197	0.000991027	0.000470862	2.10471	0.0475344	0.461024	0.592592	0.722086	0.129493
cg00130794	0.186155	0.00271859	0.00124042	2.19168	0.0398157	0.438746	0.525255	0.869189	0.343934
cg00131261	0.46733	-0.00105524	0.000245845	-4.29232	0.00032297	0.161468	0.866715	0.960897	0.0941817
cg00131272	0.23521	-0.00290589	0.00114344	-2.54136	0.018997	0.359036	0.307645	0.668604	0.360959
cg00131758	0.298489	0.00122025	0.000408218	2.98921	0.006992	0.281069	0.702179	0.837351	0.135172
cg00132108	0.180647	0.000307777	0.000143036	2.15174	0.0432066	0.448677	0.0357893	0.0746753	0.038886
cg00132255	0.354149	0.00170398	0.000502143	3.39341	0.00274009	0.231148	0.131836	0.279344	0.147508
cg00132505	0.273576	0.00368845	0.00131157	2.81224	0.0104389	0.308984	0.377962	0.737226	0.359264
cg00133116	0.22494	0.00109843	0.000444935	2.46874	0.0222267	0.374123	0.469526	0.592418	0.122892
cg00133204	0.208962	-0.000489709	0.000207918	-2.35529	0.0283096	0.398694	0.888535	0.939251	0.0507159
cg00133234	0.195547	-0.000368541	0.000163118	-2.25936	0.0346173	0.422455	0.836647	0.882439	0.0457921
cg00133289	0.361832	0.00145201	0.000420798	3.45061	0.00239549	0.225146	0.0611453	0.203762	0.142616
cg00133544	0.387451	-0.00207535	0.000569433	-3.64458	0.00151478	0.205621	0.63921	0.850832	0.211622
cg00133624	0.243172	0.00186284	0.000717146	2.59757	0.0168052	0.347288	0.437206	0.671514	0.234308
cg00133727	0.300726	0.00152549	0.00050762	3.00518	0.00674145	0.278286	0.726382	0.887436	0.161054
cg00135211	0.193787	-0.00021488	9.56419e-05	-2.24671	0.0355389	0.425887	0.944407	0.972063	0.0276553
cg00135497	0.215885	0.00196569	0.000817493	2.40453	0.0255011	0.38764	0.491699	0.776902	0.285203
cg00135546	0.175505	0.000580418	0.000274524	2.11427	0.0466243	0.458681	0.804385	0.886061	0.0816766
cg00135618	0.359414	0.000989622	0.000288304	3.43256	0.00249936	0.22646	0.793888	0.9026	0.108712
cg00135874	0.297005	0.000757699	0.000254379	2.97862	0.00716306	0.28254	0.877195	0.940706	0.0635116
cg00135888	0.456951	0.00229309	0.000545502	4.20363	0.000399282	0.166583	0.35358	0.555484	0.201904
cg00136054	0.208644	-0.00100088	0.000425357	-2.35303	0.0284456	0.3993	0.0762795	0.21083	0.13455
cg00137234	0.22484	-0.00239697	0.000971207	-2.46803	0.0222605	0.374222	0.497503	0.77917	0.281667
cg00137860	0.175906	0.00177712	0.000839371	2.1172	0.0463482	0.457866	0.628102	0.853895	0.225794
cg00138041	0.338511	0.00284765	0.000868663	3.2782	0.00358778	0.243844	0.535433	0.807673	0.272239
cg00138101	0.177902	0.000606959	0.000284723	2.13176	0.045	0.454202	0.411415	0.491277	0.0798625
cg00138451	0.222471	0.000699656	0.000285428	2.45125	0.0230774	0.377752	0.859019	0.935004	0.0759851
cg00138777	0.198337	0.000681275	0.000298887	2.27938	0.0332034	0.417402	0.587358	0.681947	0.0945888
cg00138925	0.550926	-0.0017706	0.000348838	-5.07572	5.01354e-05	0.121894	0.806772	0.92763	0.120857
cg00139455	0.2648	0.00222689	0.000809715	2.75021	0.0119933	0.319457	0.659626	0.908869	0.249243
cg00139496	0.341484	0.000742076	0.000224873	3.29998	0.00340999	0.241627	0.844824	0.909321	0.0644978
cg00139517	0.254049	-0.000367182	0.000137299	-2.67432	0.0141942	0.332118	0.913392	0.960775	0.0473828
cg00140447	0.193658	0.00141515	0.000630136	2.24578	0.0356074	0.426099	0.644742	0.834753	0.190011
cg00140998	0.304243	-0.000814183	0.000268677	-3.03034	0.0063643	0.274533	0.835953	0.921752	0.0857982
cg00141162	0.182871	0.00142494	0.000657293	2.16788	0.0418055	0.444284	0.415782	0.616613	0.200831
cg00141253	0.248919	-0.000595811	0.000225847	-2.63812	0.015374	0.338573	0.703406	0.776066	0.0726595
cg00141295	0.173126	0.000679933	0.000324261	2.09687	0.0482927	0.462947	0.801766	0.90523	0.103465
cg00141391	0.27626	0.00113121	0.000399547	2.83125	0.0100026	0.305541	0.5933	0.72279	0.12949
cg00141394	0.220509	0.000250018	0.000102578	2.43734	0.0237756	0.380741	0.934464	0.973092	0.0386282
cg00141925	0.222601	-0.000295676	0.000120577	-2.45217	0.0230319	0.377554	0.90164	0.939629	0.0379891
cg00142060	0.177012	0.00140184	0.000659605	2.12527	0.0455965	0.455596	0.570924	0.732648	0.161724
cg00142450	0.382595	0.00225162	0.000624167	3.6074	0.00165432	0.21004	0.0666668	0.298228	0.231561
cg00142482	0.228996	0.00201526	0.000806929	2.49744	0.0208934	0.368259	0.335566	0.566774	0.231208
cg00143045	0.399676	0.000411095	0.000109944	3.73913	0.00121016	0.198115	0.0211211	0.0618954	0.0407743
cg00143643	0.277171	0.00129122	0.000455024	2.8377	0.0098584	0.304185	0.110247	0.228048	0.117801
cg00144186	0.307896	0.000340502	0.000111402	3.05651	0.00599352	0.270528	0.0199182	0.0664678	0.0465496
cg00144480	0.228046	0.00171622	0.000689048	2.49072	0.0211988	0.369503	0.486983	0.686907	0.199924
cg00145055	0.282297	-0.00501747	0.0017458	-2.87403	0.009083	0.298382	0.346998	0.890936	0.543938
cg00145707	0.292682	-0.000245407	8.32503e-05	-2.94782	0.00768375	0.286117	0.954089	0.979356	0.0252668
cg00145958	0.281273	-0.00172711	0.000602461	-2.86676	0.00923319	0.299451	0.765798	0.948164	0.182366
cg00146088	0.223668	0.00205008	0.000833458	2.45973	0.0226612	0.375944	0.294528	0.518692	0.224163
cg00146334	0.17563	0.000627957	0.000296881	2.11518	0.0465381	0.458474	0.883026	0.952106	0.0690799
cg00146437	0.278549	0.000981024	0.000344527	2.84746	0.00964413	0.302828	0.801459	0.929223	0.127763
cg00146490	0.31539	0.00163309	0.000525048	3.11037	0.00529492	0.262288	0.694362	0.861597	0.167235
cg00146676	0.356419	0.000873465	0.000256128	3.41026	0.00263381	0.229221	0.127363	0.207625	0.0802625
cg00146821	0.176472	0.00099459	0.000468851	2.12133	0.0459619	0.456643	0.0242363	0.171858	0.147622
cg00147104	0.194744	0.000950408	0.000421731	2.25359	0.035035	0.424103	0.511591	0.640463	0.128872
cg00147160	0.251125	0.000737574	0.000277943	2.65369	0.0148558	0.335472	0.333267	0.414691	0.0814239
cg00147255	0.215653	-0.000289577	0.000120512	-2.40289	0.0255907	0.388064	0.929839	0.961436	0.0315965
cg00147286	0.279328	0.0012535	0.000439366	2.85298	0.00952485	0.301725	0.690404	0.834308	0.143905
cg00147332	0.268179	0.00176021	0.000634521	2.77408	0.0113707	0.315706	0.465031	0.692593	0.227561
cg00147788	0.282236	0.00345009	0.00120062	2.87359	0.00909197	0.298478	0.239856	0.627605	0.387749
cg00148048	0.29259	-0.000322453	0.000109411	-2.94716	0.00769523	0.286188	0.930498	0.975986	0.0454879
cg00148497	0.177932	0.000631343	0.00029613	2.13198	0.0449798	0.45417	0.828097	0.924079	0.095982
cg00148892	0.278293	-0.0016352	0.000574632	-2.84564	0.00968355	0.303046	0.69708	0.861825	0.164745
cg00148895	0.199348	0.00105742	0.000462437	2.28662	0.0327051	0.415505	0.784978	0.898801	0.113823
cg00149095	0.371822	-0.000557882	0.000158236	-3.52562	0.00200724	0.216265	0.91987	0.965518	0.045648
cg00149340	0.185473	0.00125636	0.000574535	2.18674	0.0402212	0.439929	0.540136	0.683977	0.143841
cg00149397	0.265383	0.000260507	9.45811e-05	2.75433	0.0118836	0.318844	0.0315245	0.0633039	0.0317794
cg00150523	0.275954	-0.00117665	0.000415911	-2.82908	0.0100514	0.306001	0.68921	0.801973	0.112763
cg00151073	0.197571	0.000949798	0.000417699	2.27388	0.0335863	0.41873	0.720019	0.852003	0.131985
cg00151250	0.269985	0.00100591	0.000360948	2.78685	0.0110504	0.313581	0.723525	0.834713	0.111188
cg00151801	0.193432	0.000505877	0.000225419	2.24416	0.0357276	0.426507	0.843268	0.913927	0.0706593
cg00152034	0.369783	0.00158311	0.000450995	3.51025	0.00208139	0.218557	0.50185	0.664511	0.162661
cg00152644	0.2615	0.00102633	0.000376372	2.72691	0.0126321	0.323396	0.794991	0.898997	0.104006
cg00152942	0.331394	0.00152246	0.000471897	3.22624	0.00404907	0.249776	0.46036	0.601952	0.141592
cg00154119	0.248822	0.000961851	0.000364691	2.63744	0.015397	0.338683	0.768504	0.867741	0.0992367
cg00154587	0.197337	-0.00162881	0.000716842	-2.2722	0.0337039	0.419226	0.467023	0.669426	0.202403
cg00154848	0.176102	0.0015089	0.000712206	2.11863	0.0462141	0.457488	0.565254	0.762926	0.197672
cg00154888	0.219115	0.000959651	0.000395331	2.42746	0.0242836	0.382747	0.072418	0.178214	0.105796
cg00155430	0.244392	-0.00257017	0.000986183	-2.60618	0.0164912	0.345277	0.465376	0.766602	0.301225
cg00155488	0.213956	0.000859515	0.000359505	2.39083	0.0262558	0.390902	0.834671	0.942002	0.107331
cg00155593	0.174065	0.000180454	8.57777e-05	2.10374	0.0476274	0.461295	0.022661	0.0521361	0.0294751
cg00155609	0.326005	0.000288101	9.03965e-05	3.18708	0.00443442	0.253964	0.0298783	0.0646935	0.0348153
cg00155685	0.227229	0.00202292	0.000814069	2.48494	0.0214645	0.370494	0.466837	0.707776	0.240939
cg00155777	0.324814	0.0041342	0.0013007	3.17845	0.00452402	0.255495	0.376058	0.761253	0.385195
cg00155799	0.303066	0.000593902	0.000196532	3.02192	0.00648827	0.275811	0.895399	0.950691	0.0552917
cg00156265	0.233961	0.00146435	0.000578212	2.53254	0.0193645	0.36109	0.72155	0.886107	0.164557
cg00156427	0.264554	0.00200015	0.000727731	2.74847	0.0120398	0.319592	0.252072	0.461428	0.209355
cg00156995	0.464633	0.00125614	0.000294239	4.26912	0.000341394	0.162641	0.776364	0.895805	0.119441
cg00157016	0.27012	0.00138207	0.000495754	2.7878	0.0110269	0.313479	0.651302	0.790341	0.139039
cg00157572	0.208193	0.00230342	0.000980255	2.34981	0.0286393	0.400101	0.364951	0.622978	0.258028
cg00157755	0.31404	0.000219058	7.06491e-05	3.10065	0.00541491	0.263478	0.0305862	0.052154	0.0215677
cg00157864	0.214759	-0.000431569	0.00018008	-2.39653	0.0259391	0.389515	0.918856	0.962976	0.0441198
cg00157962	0.188108	0.00137324	0.000622563	2.20579	0.0386763	0.435317	0.724989	0.940977	0.215988
cg00158092	0.275705	0.00244604	0.000865145	2.82732	0.0100914	0.306157	0.488714	0.713935	0.225221
cg00158442	0.236573	-0.00211885	0.000830601	-2.55099	0.0186036	0.357057	0.407274	0.626052	0.218778
cg00159439	0.235943	-0.00128988	0.000506524	-2.54654	0.0187846	0.358068	0.30514	0.462226	0.157086
cg00159614	0.304109	-0.00072333	0.000238772	-3.02938	0.00637833	0.274733	0.877924	0.962822	0.0848981
cg00159658	0.192776	0.000543181	0.000242552	2.23944	0.0360791	0.427759	0.0140997	0.0989906	0.0848908
cg00159764	0.231021	-0.00112527	0.000448002	-2.51176	0.0202567	0.365483	0.731457	0.871296	0.139838
cg00160143	0.213367	0.00087282	0.000365711	2.38664	0.0264905	0.39167	0.826201	0.935852	0.109651
cg00160440	0.22831	0.000521815	0.000209346	2.49259	0.0211134	0.369143	0.86398	0.926932	0.062952
cg00160619	0.244894	0.000379967	0.000145596	2.60973	0.0163634	0.344591	0.064934	0.111238	0.0463039
cg00160780	0.208208	0.000848918	0.000361255	2.34992	0.0286332	0.400095	0.492494	0.610237	0.117743
cg00161124	0.194669	0.00169206	0.00075101	2.25305	0.0350743	0.424267	0.561326	0.776044	0.214718
cg00161225	0.320079	0.00274092	0.000871742	3.14419	0.00489729	0.258809	0.393953	0.693492	0.299539
cg00161247	0.185177	-0.000795592	0.000364182	-2.1846	0.0403982	0.440351	0.550032	0.662032	0.112
cg00162541	0.265496	0.00147555	0.000535567	2.75512	0.0118625	0.318698	0.034386	0.197358	0.162972
cg00162673	0.320613	0.00147953	0.000469984	3.14805	0.00485379	0.258659	0.653939	0.796285	0.142346
cg00163372	0.191263	0.000846401	0.000379799	2.22855	0.0369016	0.430259	0.820353	0.94045	0.120097
cg00163510	0.217104	-0.0031079	0.00128788	-2.41319	0.0250349	0.385998	0.441022	0.840077	0.399055
cg00163549	0.207617	0.00133112	0.000567472	2.34571	0.0288885	0.401203	0.362915	0.56108	0.198165
cg00163702	0.186863	-0.00118232	0.000538202	-2.1968	0.0393988	0.437586	0.643171	0.791247	0.148077
cg00164078	0.215964	0.000985402	0.000409715	2.40509	0.0254708	0.387548	0.778649	0.8995	0.12085
cg00164189	0.203716	0.00074195	0.0003201	2.31787	0.0306326	0.40805	0.394222	0.491404	0.0971824
cg00164217	0.201966	0.000867103	0.000376126	2.30535	0.0314476	0.411024	0.62145	0.744087	0.122638
cg00164335	0.223401	0.000248581	0.000101138	2.45784	0.0227534	0.376345	0.0364354	0.0716293	0.0351939
cg00164429	0.395181	0.000873631	0.000235848	3.70421	0.0013149	0.20065	0.833309	0.917938	0.0846285
cg00164616	0.214865	-0.000645002	0.000269055	-2.39729	0.0258974	0.389335	0.852472	0.938206	0.0857347
cg00164716	0.236329	0.00219709	0.000861853	2.54927	0.0186734	0.35751	0.147828	0.373681	0.225853
cg00164727	0.244175	0.000262597	0.000100819	2.60465	0.0165466	0.345626	0.0244121	0.0536913	0.0292792
cg00164894	0.254333	-0.000830537	0.000310328	-2.67632	0.0141316	0.331651	0.796774	0.879583	0.0828087
cg00164896	0.206219	0.000867133	0.000371247	2.33573	0.0295027	0.403415	0.78965	0.914815	0.125165
cg00164898	0.302572	0.000618037	0.000204758	3.01838	0.006541	0.276214	0.0703499	0.132607	0.0622571
cg00165429	0.200455	0.000579328	0.000252481	2.29454	0.0321677	0.413812	0.852482	0.929068	0.0765856
cg00165631	0.397471	0.00168898	0.000453785	3.72197	0.00126054	0.199474	0.083487	0.225348	0.141861
cg00165981	0.208559	0.000468828	0.000199296	2.35242	0.028482	0.399385	0.0394757	0.113732	0.0742558
cg00166030	0.20121	0.000404365	0.000175815	2.29995	0.0318055	0.412398	0.0459563	0.107473	0.0615172
cg00166343	0.183339	0.00055088	0.000253712	2.17128	0.0415159	0.443319	0.880132	0.949464	0.0693318
cg00166785	0.371813	0.000236378	6.70469e-05	3.52556	0.00200756	0.216265	0.0302884	0.054064	0.0237755
cg00167076	0.349573	0.00126487	0.0003765	3.35953	0.00296664	0.23533	0.583659	0.701178	0.117519
cg00167545	0.313391	0.00210877	0.000681133	3.09598	0.00547347	0.264104	0.211298	0.410488	0.199189
cg00167717	0.289141	-0.00132416	0.000453071	-2.92262	0.00813647	0.289849	0.77758	0.900164	0.122584
cg00167922	0.191037	-0.000149705	6.7225e-05	-2.22692	0.037026	0.430537	0.0405958	0.0613189	0.0207231
cg00168147	0.284537	-0.000738748	0.00025563	-2.88992	0.00876249	0.295591	0.867679	0.935519	0.0678402
cg00168191	0.204062	-0.00194209	0.00083699	-2.32033	0.0304742	0.407366	0.23664	0.467878	0.231239
cg00168459	0.178069	0.000440864	0.00020669	2.13298	0.0448887	0.453967	0.910241	0.96932	0.0590791
cg00168981	0.207434	-0.00111877	0.000477208	-2.3444	0.0289682	0.401524	0.610593	0.759952	0.149359
cg00169030	0.199597	0.00139615	0.000610096	2.2884	0.0325834	0.415057	0.367538	0.54235	0.174812
cg00169061	0.295874	-0.00211849	0.000713163	-2.97056	0.00729601	0.283454	0.208837	0.422759	0.213921
cg00169121	0.173374	0.00188452	0.000897953	2.09868	0.0481164	0.46254	0.422336	0.711957	0.28962
cg00169167	0.216814	-0.00153346	0.000635991	-2.41113	0.025145	0.386401	0.303284	0.480943	0.177658
cg00169303	0.175171	-0.00161798	0.000766148	-2.11183	0.0468547	0.459304	0.189148	0.389116	0.199968
cg00169401	0.233528	0.000335975	0.000132824	2.52948	0.0194936	0.361687	0.919625	0.96235	0.0427244
cg00171092	0.386226	0.00319796	0.000879725	3.63518	0.00154892	0.20665	0.541695	0.82382	0.282126
cg00171690	0.530462	0.00263376	0.000540722	4.87082	8.13622e-05	0.13032	0.620333	0.82168	0.201347
cg00172020	0.483633	-0.000307871	6.94194e-05	-4.43495	0.000229667	0.154759	0.0253339	0.0501087	0.0247748
cg00172249	0.32941	-0.00257568	0.000801942	-3.21181	0.00418718	0.25151	0.0724784	0.292173	0.219695
cg00172376	0.201157	0.000552159	0.000240114	2.29957	0.0318311	0.412457	0.0601102	0.149316	0.089206
cg00172803	0.348626	0.00212223	0.000633021	3.35254	0.0030156	0.236627	0.651481	0.824669	0.173189
cg00172967	0.253367	0.000649895	0.000243452	2.6695	0.0143462	0.332982	0.019154	0.0958665	0.0767125
cg00173659	0.398797	0.000599092	0.000160516	3.73228	0.00123003	0.198422	0.0811652	0.139954	0.0587887
cg00173667	0.274155	0.000363831	0.000129186	2.81634	0.0103433	0.308329	0.0281151	0.060805	0.0326898
cg00173760	0.298573	0.000441624	0.00014771	2.98981	0.00698242	0.280887	0.92549	0.966964	0.0414737
cg00173804	0.189071	0.00109745	0.000495966	2.21274	0.038126	0.433801	0.743896	0.911949	0.168053
cg00174096	0.213883	0.000840069	0.000351447	2.39031	0.0262846	0.390978	0.025514	0.152278	0.126764
cg00174103	0.17773	-0.000276707	0.000129878	-2.13051	0.0451144	0.454576	0.0342658	0.0736394	0.0393736
cg00174508	0.185387	-0.00205585	0.000940409	-2.18612	0.0402725	0.44008	0.344457	0.65178	0.307323
cg00174514	0.328756	0.000991493	0.00030916	3.20706	0.00423361	0.252137	0.850948	0.963152	0.112204
cg00174573	0.406494	0.00382566	0.00100875	3.79249	0.00106589	0.194196	0.338973	0.620351	0.281378
cg00174595	0.268883	0.00104881	0.000377396	2.77906	0.0112448	0.315019	0.784495	0.918119	0.133624
cg00174734	0.181557	0.000930172	0.000430964	2.15835	0.0426277	0.446803	0.819976	0.927184	0.107208
cg00175153	0.175452	-0.00120037	0.00056785	-2.11389	0.0466605	0.458765	0.667145	0.824129	0.156983
cg00175395	0.239715	0.00226632	0.00088075	2.57318	0.0177256	0.352183	0.412127	0.633343	0.221216
cg00175482	0.243109	-0.00202025	0.000777877	-2.59713	0.0168213	0.347398	0.60222	0.798619	0.196398
cg00175487	0.224357	-0.00083526	0.000338901	-2.46461	0.0224247	0.37492	0.804259	0.905848	0.101589
cg00175641	0.243992	-0.000184685	7.09412e-05	-2.60336	0.0165935	0.345899	0.931829	0.950412	0.0185835
cg00175838	0.331065	0.000995934	0.000308928	3.22384	0.00407171	0.249919	0.69555	0.806797	0.111247
cg00176210	0.211076	0.00144439	0.000609361	2.37034	0.0274224	0.395393	0.649702	0.833051	0.183349
cg00176584	0.195509	-0.000990612	0.000438502	-2.25908	0.0346373	0.422486	0.70476	0.829656	0.124896
cg00177496	0.194575	0.000379794	0.000168619	2.25238	0.0351233	0.42443	0.0556877	0.114407	0.0587195
cg00177797	0.273318	0.000361023	0.000128459	2.81042	0.0104817	0.309217	0.046422	0.0848159	0.038394
cg00178070	0.236551	0.000944975	0.000370457	2.55083	0.0186099	0.357084	0.824837	0.939471	0.114634
cg00178122	0.346503	-0.00120547	0.000361256	-3.33689	0.00312818	0.238299	0.811401	0.912911	0.101509
cg00178562	0.249883	-0.00225124	0.000851155	-2.64493	0.0151454	0.337397	0.275514	0.529729	0.254215
cg00178648	0.236715	-0.000409151	0.000160326	-2.55199	0.0185631	0.35685	0.883281	0.927625	0.0443436
cg00178728	0.277734	-0.00329333	0.00115894	-2.84168	0.00977039	0.303656	0.191473	0.589728	0.398255
cg00178864	0.298993	0.00372422	0.00124439	2.99281	0.0069348	0.280407	0.1675	0.570622	0.403122
cg00178897	0.263966	0.00169371	0.000617169	2.74432	0.0121518	0.320299	0.144158	0.334678	0.19052
cg00179374	0.294475	0.0022424	0.000757418	2.96059	0.00746368	0.284745	0.604365	0.858599	0.254234
cg00180684	0.178799	-0.000924705	0.00043245	-2.1383	0.0444059	0.452547	0.794563	0.919956	0.125393
cg00180806	0.283742	-0.00138364	0.000479717	-2.88428	0.00887492	0.296196	0.761474	0.907093	0.145619
cg00180930	0.243786	-0.000511561	0.00019661	-2.60191	0.0166464	0.346221	0.895125	0.952413	0.0572875
cg00181061	0.186373	0.000527978	0.000240728	2.19325	0.0396867	0.438431	0.88487	0.944607	0.059737
cg00181327	0.232376	0.00159893	0.000634159	2.52134	0.0198408	0.36316	0.400862	0.571595	0.170733
cg00182149	0.383128	0.00240382	0.000665608	3.61147	0.00163845	0.209657	0.072747	0.27453	0.201783
cg00182202	0.208004	-0.00101772	0.000433357	-2.34847	0.0287209	0.400474	0.783895	0.912541	0.128646
cg00182635	0.302281	-0.00410277	0.0013602	-3.01631	0.00657213	0.276582	0.422719	0.819377	0.396659
cg00182639	0.317747	-0.00108575	0.000347178	-3.12736	0.00509144	0.260504	0.455021	0.55754	0.102519
cg00183317	0.30725	-0.000518202	0.000169798	-3.05188	0.00605757	0.271241	0.925621	0.97482	0.0491986
cg00183457	0.262323	0.000987746	0.000361452	2.73271	0.0124699	0.322413	0.802241	0.902755	0.100514
cg00183776	0.197745	0.000166421	7.31479e-05	2.27513	0.033499	0.418511	0.957903	0.977993	0.0200893
cg00183927	0.182624	0.00105964	0.000489195	2.16609	0.0419589	0.444662	0.639638	0.787123	0.147485
cg00184005	0.243397	0.00239984	0.000923314	2.59916	0.0167467	0.346933	0.507779	0.768194	0.260416
cg00184189	0.195939	-0.000127326	5.62849e-05	-2.26217	0.0344156	0.421786	0.963772	0.98279	0.0190176
cg00184279	0.243474	0.00107143	0.000412133	2.59971	0.0167268	0.346818	0.820104	0.961647	0.141543
cg00184290	0.187503	0.000267364	0.000121451	2.20142	0.0390262	0.436387	0.932823	0.964961	0.0321376
cg00184376	0.230564	0.000672444	0.000268063	2.50853	0.0203987	0.365934	0.16794	0.250276	0.0823358
cg00184452	0.176013	0.000456862	0.000215707	2.11798	0.0462755	0.457619	0.311014	0.379969	0.0689545
cg00184457	0.332619	0.00180515	0.000557978	3.23517	0.00396595	0.248738	0.728215	0.897732	0.169517
cg00184799	0.591962	0.00297732	0.000539411	5.51958	1.77684e-05	0.103772	0.706119	0.916862	0.210743
cg00184826	0.171635	0.000887084	0.000425268	2.08594	0.0493679	0.466192	0.113976	0.234861	0.120884
cg00184893	0.212701	0.000130115	5.46264e-05	2.3819	0.0267582	0.392761	0.0195948	0.0345981	0.0150033
cg00184919	0.254843	0.00289337	0.00107965	2.67992	0.0140196	0.331191	0.394131	0.775774	0.381643
cg00185839	0.328039	0.00023218	7.25144e-05	3.20184	0.00428514	0.252284	0.0164988	0.0412277	0.0247289
cg00186115	0.197769	0.000442408	0.000194439	2.2753	0.0334868	0.418454	0.893068	0.952264	0.0591964
cg00186207	0.274912	-0.000300086	0.000106349	-2.8217	0.0102195	0.30728	0.926861	0.958775	0.0319141
cg00186252	0.23578	-0.00201496	0.000791614	-2.54539	0.0188317	0.358254	0.407297	0.611107	0.20381
cg00186504	0.399612	0.00124417	0.000332786	3.73863	0.0012116	0.198115	0.753406	0.880387	0.126981
cg00186789	0.197624	0.00078412	0.00034478	2.27426	0.0335597	0.418669	0.793847	0.901527	0.107679
cg00186815	0.209257	0.00119818	0.000508266	2.35739	0.0281845	0.398264	0.732342	0.881287	0.148945
cg00187126	0.242397	-0.00110296	0.000425508	-2.59211	0.0170074	0.348596	0.786038	0.913583	0.127545
cg00187229	0.257568	0.00138486	0.000513074	2.69915	0.0134352	0.328311	0.352456	0.521596	0.16914
cg00187327	0.230996	-0.00399148	0.00158923	-2.51159	0.0202642	0.365483	0.404425	0.876912	0.472488
cg00187557	0.343712	0.00148077	0.000446505	3.31635	0.00328208	0.23995	0.33484	0.47688	0.14204
cg00188321	0.243438	-0.00223456	0.000859626	-2.59945	0.0167361	0.34683	0.660946	0.893963	0.233016
cg00188356	0.360524	0.00109169	0.000317274	3.44084	0.00245116	0.22556	0.733714	0.848877	0.115163
cg00188443	0.213517	0.000534016	0.000223652	2.38771	0.0264304	0.391525	0.891242	0.970748	0.0795058
cg00188837	0.186087	0.0011927	0.000544318	2.19118	0.0398561	0.438896	0.748921	0.873256	0.124336
cg00189117	0.250303	0.000145658	5.5009e-05	2.64789	0.0150469	0.336794	0.0164291	0.0341492	0.0177201
cg00189315	0.295336	0.00161901	0.000545723	2.96672	0.0073601	0.284093	0.13103	0.284017	0.152987
cg00189939	0.317213	0.000543331	0.000173949	3.1235	0.00513693	0.26097	0.88363	0.938304	0.0546739
cg00189975	0.198489	-0.000648378	0.000284319	-2.28046	0.0331282	0.417187	0.0652317	0.144772	0.0795404
cg00190116	0.264923	0.000593156	0.000215608	2.75108	0.01197	0.319298	0.89858	0.965601	0.0670206
cg00190228	0.248398	0.00105268	0.000399584	2.63445	0.0154988	0.339357	0.65517	0.760864	0.105694
cg00190549	0.184949	-0.00200537	0.000918654	-2.18295	0.0405354	0.440707	0.548475	0.845599	0.297124
cg00191052	0.185991	0.00262145	0.00119674	2.19049	0.0399128	0.438947	0.479021	0.836997	0.357976
cg00191903	0.32782	-0.0032619	0.00101926	-3.20026	0.00430097	0.252489	0.534186	0.845213	0.311027
cg00192031	0.417499	0.00177614	0.000457813	3.87962	0.000866023	0.188977	0.325992	0.481734	0.155742
cg00192605	0.30314	0.0011548	0.000382076	3.02244	0.00648042	0.275741	0.532233	0.650575	0.118342
cg00193021	0.45826	0.000368885	8.75226e-05	4.21474	0.000388818	0.166059	0.0449636	0.07985	0.0348864
cg00193135	0.188702	-0.00134073	0.000606643	-2.21008	0.0383359	0.434255	0.292135	0.504818	0.212683
cg00193959	0.178067	0.00102894	0.000482401	2.13296	0.04489	0.453967	0.659074	0.831309	0.172235
cg00193963	0.427576	0.00208739	0.000527042	3.96057	0.000713884	0.182832	0.13581	0.314242	0.178432
cg00194126	0.392818	0.0038738	0.00105097	3.68592	0.00137327	0.202705	0.3764	0.681211	0.304812
cg00194681	0.234483	0.000524999	0.000207	2.53623	0.0192101	0.360171	0.0468275	0.112245	0.0654172
cg00194699	0.287041	0.00235784	0.000810894	2.9077	0.00841661	0.292513	0.419712	0.656219	0.236506
cg00195646	0.350284	0.00121749	0.000361831	3.36479	0.0029303	0.234857	0.799796	0.915116	0.115319
cg00196166	0.185021	-0.000421138	0.000192875	-2.18347	0.0404922	0.440577	0.889547	0.938058	0.0485118
cg00196200	0.299752	0.00177735	0.000592799	2.99823	0.00684948	0.279324	0.814356	0.968217	0.153861
cg00196377	0.227926	0.000303387	0.000121848	2.48987	0.0212377	0.369726	0.933023	0.964767	0.0317446
cg00196660	0.197244	-0.00074131	0.000326348	-2.27153	0.033751	0.419412	0.710473	0.818344	0.107871
cg00197295	0.372996	0.00246686	0.000697939	3.53449	0.00196565	0.215708	0.63588	0.866434	0.230554
cg00197389	0.348971	0.00126964	0.000378421	3.35509	0.00299767	0.236126	0.0819949	0.218214	0.136219
cg00198525	0.284622	0.000867661	0.000300175	2.89052	0.00875049	0.295491	0.85054	0.941116	0.0905765
cg00198594	0.290217	0.000964165	0.000329036	2.93027	0.00799641	0.288726	0.0943362	0.215406	0.121069
cg00198604	0.171922	0.00267423	0.00128074	2.08804	0.0491594	0.465622	0.579869	0.925656	0.345787
cg00199065	0.182936	0.000384287	0.000177225	2.16836	0.0417647	0.444162	0.905681	0.951334	0.0456527
cg00199084	0.188671	0.000447139	0.000202339	2.20985	0.038354	0.43434	0.0394161	0.106953	0.0675366
cg00199222	0.314554	0.000775894	0.000249938	3.10435	0.00536891	0.263237	0.830188	0.908958	0.0787704
cg00200063	0.284846	0.000609181	0.000210636	2.89211	0.00871905	0.295024	0.0193458	0.0808641	0.0615183
cg00200164	0.210553	0.00052167	0.000220428	2.36662	0.0276393	0.396235	0.872366	0.952796	0.0804299
cg00200230	0.185612	0.00160601	0.000734092	2.18775	0.0401381	0.439626	0.46769	0.660694	0.193004
cg00200629	0.206001	0.00121123	0.000518909	2.33418	0.0295995	0.403984	0.755946	0.916054	0.160108
cg00200734	0.191641	0.0014715	0.000659489	2.23127	0.0366945	0.429736	0.418093	0.609797	0.191705
cg00201025	0.220855	0.000943714	0.0003868	2.4398	0.0236511	0.380215	0.81021	0.933263	0.123053
cg00201234	0.344988	0.00112786	0.000339132	3.32573	0.00321087	0.239598	0.1238	0.229475	0.105675
cg00201257	0.216628	0.000448509	0.000186118	2.40981	0.0252162	0.386807	0.893826	0.951881	0.0580551
cg00201468	0.382399	0.00138449	0.000383951	3.6059	0.00166018	0.210062	0.0321345	0.154015	0.121881
cg00201968	0.183359	0.00135441	0.000623739	2.17143	0.0415034	0.443276	0.629044	0.791269	0.162225
cg00202150	0.240704	-0.00084968	0.000329313	-2.58016	0.0174574	0.350845	0.376177	0.478299	0.102121
cg00202333	0.411238	0.00380915	0.000994584	3.82989	0.000975034	0.191729	0.551753	0.873175	0.321422
cg00202403	0.333826	0.000213776	6.58996e-05	3.24396	0.00388559	0.247838	0.031433	0.048259	0.016826
cg00202506	0.242936	-0.000457963	0.000176417	-2.59591	0.0168663	0.347762	0.876521	0.932414	0.0558924
cg00202829	0.405881	0.00142906	0.000377294	3.78767	0.00107818	0.194357	0.211373	0.347334	0.135962
cg00203687	0.184613	0.00106225	0.000487154	2.18052	0.0407381	0.441288	0.177232	0.335527	0.158295
cg00203838	0.24581	-0.000321035	0.000122711	-2.61619	0.0161331	0.343215	0.937492	0.970407	0.0329152
cg00203915	0.267401	-0.00219001	0.000791021	-2.76859	0.0115113	0.316331	0.446783	0.674446	0.227663
cg00204159	0.511279	0.00300409	0.000640921	4.68715	0.000125857	0.141626	0.102374	0.360983	0.25861
cg00204465	0.189134	0.000884025	0.000399433	2.2132	0.0380903	0.433741	0.108464	0.236922	0.128458
cg00204533	0.201615	-0.00190401	0.000826808	-2.30285	0.0316132	0.411705	0.738045	0.943561	0.205516
cg00204802	0.195724	0.00344971	0.00152599	2.26063	0.0345259	0.422086	0.256366	0.777779	0.521414
cg00204976	0.286461	0.000752987	0.00025933	2.90358	0.00849555	0.293273	0.88348	0.964232	0.0807516
cg00205522	0.284078	0.00099355	0.000344186	2.88666	0.00882724	0.296049	0.312744	0.405082	0.0923376
cg00205658	0.206053	0.000238326	0.000102087	2.33455	0.0295761	0.403815	0.0207174	0.0495768	0.0288594
cg00206063	0.17692	0.00127248	0.00059893	2.1246	0.0456588	0.4558	0.786657	0.940407	0.15375
cg00206271	0.242807	-0.00112396	0.000433124	-2.595	0.0169001	0.347944	0.351512	0.465433	0.113921
cg00206287	0.323765	0.00150999	0.000476211	3.17085	0.00460433	0.256441	0.655121	0.812889	0.157767
cg00206381	0.342756	0.00272128	0.000822309	3.30932	0.00333641	0.240652	0.487975	0.761613	0.273639
cg00206394	0.213388	-0.00147011	0.000615939	-2.38679	0.0264822	0.39167	0.333611	0.562409	0.228797
cg00206414	0.24858	0.00217184	0.000824	2.63573	0.0154551	0.33915	0.0504976	0.322903	0.272406
cg00206490	0.303104	0.000706011	0.000233609	3.02219	0.00648426	0.275744	0.814871	0.893351	0.0784806
cg00206966	0.178499	-0.000597181	0.000279565	-2.13611	0.0446037	0.453187	0.858139	0.934697	0.0765578
cg00207352	0.17957	0.000965888	0.000450526	2.14391	0.0439016	0.450758	0.0982147	0.234477	0.136262
cg00207636	0.34628	0.00138533	0.000415361	3.33525	0.0031402	0.238451	0.0557172	0.219342	0.163625
cg00207856	0.240465	0.000747265	0.00028981	2.57847	0.0175219	0.351101	0.889473	0.966475	0.0770019
cg00207965	0.178001	0.000698387	0.0003275	2.13248	0.0449339	0.454064	0.0315161	0.15584	0.124324
cg00208504	0.200404	0.00144548	0.000630062	2.29418	0.0321921	0.413914	0.299707	0.499578	0.199871
cg00209066	0.193986	-0.000450731	0.000200491	-2.24814	0.0354338	0.425541	0.896272	0.950726	0.054454
cg00209424	0.18749	0.000269788	0.000122557	2.20133	0.0390335	0.43641	0.0307938	0.071897	0.0411032
cg00210426	0.34599	-0.00135282	0.000405874	-3.3331	0.00315598	0.238772	0.789956	0.922579	0.132623
cg00210548	0.366079	0.000501869	0.000144115	3.48241	0.00222263	0.222005	0.0411046	0.0912832	0.0501786
cg00210856	0.304932	0.00159717	0.000526204	3.03527	0.00629279	0.2741	0.695656	0.858993	0.163336
cg00211337	0.231624	-0.000466793	0.000185529	-2.51602	0.0200707	0.364441	0.856184	0.908871	0.0526876
cg00211403	0.17806	0.00122567	0.000574645	2.13291	0.0448945	0.453985	0.497984	0.688683	0.190699
cg00211648	0.240386	0.000136476	5.29405e-05	2.57791	0.0175433	0.351288	0.0233491	0.0416129	0.0182638
cg00211821	0.256276	0.00283613	0.00105431	2.69003	0.0137094	0.329883	0.411942	0.74544	0.333497
cg00212774	0.193292	0.00117902	0.000525609	2.24315	0.0358022	0.426805	0.776832	0.926631	0.149799
cg00212979	0.246054	0.00166424	0.000635713	2.61791	0.0160723	0.342839	0.618596	0.806251	0.187654
cg00213004	0.282109	0.000223418	7.77733e-05	2.87269	0.00911049	0.298587	0.0390246	0.0608916	0.021867
cg00213052	0.311145	0.00100256	0.000325524	3.07983	0.00568075	0.267087	0.104627	0.224566	0.119939
cg00213113	0.196606	-0.00102095	0.000450362	-2.26696	0.0340742	0.420578	0.729061	0.881109	0.152048
cg00213189	0.178749	-0.00236962	0.00110837	-2.13793	0.0444387	0.452658	0.544087	0.856931	0.312844
cg00213663	0.320024	0.000337183	0.000107253	3.1438	0.00490174	0.258809	0.925895	0.955737	0.0298422
cg00213761	0.217586	0.000705135	0.000291787	2.41661	0.0248529	0.385218	0.842113	0.935341	0.0932284
cg00213900	0.220306	0.0025952	0.00106539	2.43591	0.0238487	0.381135	0.587302	0.919162	0.33186
cg00213967	0.343492	0.000838802	0.000253053	3.31473	0.00329452	0.239962	0.0543477	0.135333	0.0809857
cg00214628	0.183884	0.00172317	0.000792179	2.17523	0.0411817	0.442606	0.564084	0.774147	0.210063
cg00215758	0.281027	0.00078769	0.000274934	2.86502	0.00926957	0.299667	0.85128	0.932088	0.0808081
cg00216281	0.246483	0.000540827	0.000206349	2.62094	0.0159658	0.342156	0.848289	0.906277	0.0579883
cg00216676	0.402683	-0.00349007	0.000927568	-3.7626	0.00114445	0.196278	0.501601	0.85881	0.357209
cg00216831	0.247879	0.000320689	0.000121899	2.63079	0.0156241	0.339989	0.033624	0.0783072	0.0446831
cg00217055	0.292139	-0.000525368	0.000178457	-2.94395	0.00775172	0.286747	0.871997	0.927394	0.0553972
cg00217688	0.196775	-0.000260018	0.000114638	-2.26817	0.0339883	0.420245	0.932264	0.967751	0.0354866
cg00217859	0.194065	0.00149338	0.000664104	2.24871	0.0353919	0.425453	0.45995	0.633049	0.173098
cg00218114	0.239738	0.00202665	0.000787558	2.57333	0.0177194	0.352142	0.498293	0.750722	0.252429
cg00218229	0.346804	0.00135543	0.000405928	3.3391	0.003112	0.237922	0.093919	0.237646	0.143727
cg00218409	0.276704	0.00162102	0.000571912	2.83439	0.00993209	0.305007	0.180809	0.381201	0.200392
cg00220102	0.260258	0.00161344	0.000593582	2.71814	0.0128807	0.325317	0.331027	0.475514	0.144487
cg00220419	0.180178	-0.00102247	0.000475939	-2.14833	0.0435082	0.449623	0.761165	0.87926	0.118095
cg00220721	0.21523	0.000789905	0.000329144	2.39988	0.0257552	0.388771	0.791822	0.887631	0.095809
cg00220845	0.303688	0.0031336	0.00103543	3.02636	0.00642251	0.275314	0.443313	0.763839	0.320526
cg00220905	0.238492	0.000395359	0.000154164	2.56454	0.0180627	0.35383	0.0512686	0.0985318	0.0472632
cg00220953	0.284681	-0.000695881	0.000240711	-2.89094	0.00874223	0.295404	0.859186	0.944058	0.084872
cg00221668	0.290683	-0.000874681	0.000298161	-2.93359	0.00793639	0.288198	0.683962	0.781199	0.0972374
cg00221709	0.175694	0.00116696	0.000551586	2.11565	0.0464938	0.458392	0.723774	0.904487	0.180714
cg00221745	0.482874	0.000410664	9.27381e-05	4.42821	0.00023339	0.155635	0.0201858	0.0540978	0.033912
cg00221805	0.209963	0.00160786	0.000680596	2.36242	0.027886	0.397096	0.472393	0.674344	0.20195
cg00222056	0.208412	0.000353202	0.000150211	2.35137	0.0285453	0.399612	0.0559591	0.101728	0.0457694
cg00222646	0.198062	-0.00284215	0.00124798	-2.2774	0.0333406	0.417899	0.327744	0.653198	0.325454
cg00222691	0.361722	-0.00228631	0.000662741	-3.44978	0.00240013	0.225146	0.698101	0.873682	0.175582
cg00222801	0.304011	-0.00339617	0.00112134	-3.02868	0.00638855	0.274857	0.305608	0.653317	0.347709
cg00222842	0.213742	0.00194976	0.000816035	2.3893	0.0263409	0.391137	0.351813	0.589727	0.237914
cg00223010	0.174428	0.00129773	0.000616089	2.1064	0.0473726	0.460707	0.684577	0.884827	0.200249
cg00223315	0.463128	0.00288258	0.000677262	4.25622	0.000352089	0.163726	0.546565	0.770876	0.224311
cg00223877	0.299499	0.00103883	0.000346692	2.99642	0.00687788	0.279716	0.110499	0.210976	0.100477
cg00224086	0.181054	-0.00124569	0.000578129	-2.1547	0.0429468	0.447836	0.383721	0.568287	0.184567
cg00224771	0.335158	0.000929828	0.000285777	3.25368	0.00379867	0.246778	0.709561	0.798619	0.0890581
cg00224807	0.188436	0.00336524	0.001524	2.20816	0.0384879	0.434773	0.536534	0.93885	0.402316
cg00225196	0.173617	-0.00187092	0.000890721	-2.10046	0.0479439	0.462085	0.328818	0.560026	0.231208
cg00225623	0.343024	0.00258011	0.000779186	3.31129	0.0033211	0.240405	0.308859	0.534786	0.225928
cg00225902	0.244973	0.00378495	0.00145001	2.61028	0.0163436	0.344428	0.369242	0.802828	0.433586
cg00225910	0.28579	0.00073077	0.000252093	2.89881	0.00858779	0.29381	0.583307	0.662725	0.0794186
cg00225947	0.182768	0.000644468	0.000297382	2.16714	0.0418693	0.44439	0.851746	0.941463	0.0897168
cg00226143	0.343357	0.000821293	0.000247845	3.31374	0.00330217	0.240067	0.0178138	0.0901317	0.0723179
cg00226183	0.179504	0.00123798	0.00057757	2.14343	0.0439447	0.450857	0.766334	0.939427	0.173093
cg00226489	0.230164	0.000844102	0.000336873	2.5057	0.020524	0.366581	0.837992	0.932147	0.0941543
cg00226651	0.348189	0.00227035	0.000677857	3.34931	0.00303849	0.237214	0.413819	0.627519	0.2137
cg00226849	0.179089	-0.00105823	0.000494407	-2.14041	0.0442156	0.451805	0.62731	0.763928	0.136618
cg00226956	0.189337	0.000794859	0.000358908	2.21466	0.0379756	0.433469	0.262293	0.358656	0.0963625
cg00227093	0.182798	-0.00128407	0.000592456	-2.16736	0.0418504	0.444363	0.0761072	0.241759	0.165651
cg00227342	0.188595	0.00122259	0.000553384	2.20931	0.0383972	0.434481	0.66597	0.829476	0.163506
cg00227772	0.210439	-0.000322153	0.00013617	-2.36581	0.0276866	0.396337	0.915772	0.955474	0.039702
cg00227784	0.276647	0.00121297	0.000428008	2.83399	0.00994107	0.305077	0.730078	0.856057	0.125979
cg00227790	0.174444	-0.0026906	0.00127728	-2.10651	0.0473615	0.460687	0.484724	0.832437	0.347713
cg00228144	0.308846	0.00167513	0.000546835	3.06333	0.00590042	0.269753	0.590067	0.725595	0.135528
cg00228272	0.229185	0.00172623	0.000690829	2.49878	0.0208333	0.367876	0.364548	0.552584	0.188037
cg00228355	0.347403	0.00196806	0.000588621	3.34352	0.00308	0.237517	0.341876	0.517728	0.175853
cg00228708	0.226498	-0.00126248	0.000509114	-2.47977	0.0217053	0.371628	0.735271	0.876653	0.141382
cg00229233	0.223193	0.000779821	0.000317469	2.45637	0.0228255	0.37666	0.854191	0.934735	0.0805442
cg00229359	0.300835	0.00161842	0.000538403	3.00597	0.00672941	0.278257	0.527728	0.684741	0.157013
cg00230074	0.218465	0.00103837	0.000428573	2.42285	0.0245239	0.383755	0.201125	0.331025	0.1299
cg00230207	0.179476	-0.000464043	0.000216516	-2.14322	0.0439629	0.450878	0.845645	0.922207	0.0765628
cg00230725	0.259293	0.000838666	0.00030932	2.71132	0.0130772	0.326308	0.846702	0.944392	0.0976891
cg00230895	0.226278	0.00205376	0.000828726	2.47821	0.0217782	0.372063	0.198875	0.413767	0.214892
cg00231049	0.242516	0.000368752	0.000142214	2.59294	0.0169762	0.348431	0.0275983	0.0625586	0.0349603
cg00231338	0.426489	0.00182357	0.000461455	3.95178	0.000729021	0.183245	0.713278	0.880881	0.167603
cg00231504	0.286205	0.0030067	0.00103617	2.90176	0.00853065	0.293595	0.21038	0.512841	0.302461
cg00231717	0.244728	-0.000534076	0.00020474	-2.60855	0.0164057	0.344963	0.850678	0.9135	0.0628226
cg00231918	0.372139	0.00208293	0.000590398	3.52801	0.00199594	0.215908	0.447617	0.668553	0.220936
cg00231966	0.217074	0.00150624	0.000624224	2.41298	0.0250464	0.386029	0.70884	0.885117	0.176277
cg00232086	0.19685	-0.00226231	0.000997177	-2.26871	0.03395	0.420091	0.519747	0.788424	0.268677
cg00232107	0.292607	0.00123697	0.000419697	2.94728	0.0076932	0.286188	0.802148	0.949172	0.147024
cg00232201	0.241643	0.00147309	0.000569466	2.58679	0.0172064	0.349594	0.502502	0.661212	0.15871
cg00232265	0.252592	0.0010336	0.000387984	2.66404	0.0145204	0.333813	0.799846	0.893368	0.0935221
cg00232388	0.206814	-0.00702052	0.00300025	-2.33998	0.0292399	0.402453	0.469348	0.974899	0.505551
cg00232402	0.24374	0.00245423	0.00094336	2.60158	0.0166583	0.346269	0.53468	0.876036	0.341356
cg00232453	0.22503	0.00140308	0.000568193	2.46938	0.0221961	0.373962	0.38288	0.565907	0.183027
cg00232500	0.289409	0.00112722	0.000385435	2.92453	0.00810139	0.289639	0.546896	0.658419	0.111524
cg00232745	0.214764	0.00060141	0.000250946	2.39657	0.0259371	0.389515	0.899627	0.970287	0.0706595
cg00232832	0.180094	0.00221519	0.00103142	2.14772	0.0435625	0.449749	0.361666	0.686185	0.324518
cg00232903	0.21618	-0.000546412	0.000227044	-2.40663	0.0253874	0.387319	0.819212	0.895453	0.0762406
cg00233079	0.302995	0.00032058	0.000106103	3.02141	0.00649581	0.275811	0.0270919	0.0591253	0.0320335
cg00233307	0.286792	0.00112197	0.000386096	2.90593	0.00845042	0.292785	0.0893304	0.179626	0.0902955
cg00233464	0.182824	0.00100366	0.000463041	2.16755	0.0418345	0.444308	0.423366	0.567796	0.14443
cg00233594	0.195741	0.0010679	0.000472367	2.26075	0.0345176	0.422054	0.710406	0.858433	0.148027
cg00233948	0.179874	0.00127982	0.00059634	2.14612	0.0437044	0.450226	0.732319	0.930254	0.197935
cg00234200	0.248237	0.00150308	0.000570796	2.63331	0.0155375	0.339573	0.77449	0.930497	0.156008
cg00234616	0.234248	0.000811075	0.000320005	2.53457	0.0192796	0.360552	0.138044	0.237365	0.0993213
cg00234726	0.342999	0.00223707	0.000675626	3.3111	0.00332253	0.240429	0.62315	0.8494	0.22625
cg00235260	0.255834	0.000790485	0.000294198	2.68692	0.0138043	0.330489	0.0575435	0.1431	0.085556
cg00236004	0.33202	0.00226509	0.000701092	3.2308	0.00400643	0.249231	0.451173	0.642444	0.191272
cg00236225	0.218676	0.000526632	0.000217226	2.42435	0.0244456	0.383503	0.0402398	0.107651	0.0674114
cg00236270	0.235038	-0.000530339	0.000208783	-2.54015	0.0190474	0.359428	0.900827	0.974332	0.073505
cg00236406	0.171413	0.000851324	0.000408444	2.08431	0.04953	0.466683	0.0556414	0.181541	0.1259
cg00236601	0.298823	-0.000373223	0.000124757	-2.99159	0.00695412	0.280557	0.936846	0.973204	0.0363585
cg00236766	0.183017	-0.00088917	0.000409955	-2.16894	0.0417151	0.443983	0.648389	0.760332	0.111943
cg00236832	0.174074	0.000262304	0.000124681	2.1038	0.0476213	0.461255	0.031407	0.0747085	0.0433015
cg00237714	0.240944	0.000672908	0.00026063	2.58185	0.017393	0.350403	0.853626	0.932745	0.079119
cg00238023	0.177154	-0.000398346	0.000187342	-2.12631	0.0455003	0.455358	0.9092	0.972434	0.0632343
cg00238318	0.269705	0.000224485	8.0609e-05	2.78487	0.0110996	0.31399	0.0207451	0.0434849	0.0227398
cg00238508	0.198256	0.000988386	0.000433731	2.2788	0.0332436	0.417609	0.832156	0.951301	0.119145
cg00238848	0.272204	0.00147404	0.000525966	2.80254	0.0106686	0.310984	0.423572	0.589908	0.166336
cg00238910	0.197846	-0.000488997	0.000214863	-2.27585	0.0334483	0.418322	0.882103	0.938069	0.0559658
cg00238994	0.226921	0.000232875	9.37968e-05	2.48276	0.0215657	0.370978	0.0470563	0.0771169	0.0300605
cg00239350	0.307956	0.00184172	0.000602471	3.05694	0.0059876	0.270486	0.113088	0.307612	0.194524
cg00239420	0.217444	-0.000180027	7.45265e-05	-2.41561	0.0249063	0.385409	0.962338	0.981077	0.0187385
cg00239796	0.195875	-0.000304512	0.000134638	-2.26171	0.0344483	0.42192	0.924804	0.962697	0.0378923
cg00239835	0.230165	0.00109157	0.000435634	2.50571	0.0205235	0.366581	0.384608	0.521383	0.136775
cg00239847	0.174748	0.000275307	0.000130555	2.10874	0.0471488	0.460041	0.940062	0.972039	0.0319768
cg00240195	0.213269	0.000854959	0.000358331	2.38595	0.0265295	0.39187	0.799761	0.907219	0.107458
cg00240205	0.214767	0.00224427	0.000936442	2.39659	0.0259358	0.389515	0.544433	0.869991	0.325558
cg00240850	0.356114	-0.00191478	0.000561849	-3.408	0.00264783	0.229548	0.448046	0.664437	0.216391
cg00240860	0.221323	-0.00226844	0.0009285	-2.44312	0.0234833	0.379603	0.309778	0.594386	0.284608
cg00241142	0.174443	-0.000137379	6.52164e-05	-2.10651	0.0473618	0.460687	0.959961	0.977318	0.017357
cg00241285	0.325169	0.00233098	0.000732778	3.18102	0.00449716	0.254929	0.556623	0.8341	0.277476
cg00241712	0.301386	0.00135029	0.000448616	3.00991	0.00666905	0.277688	0.0668676	0.229229	0.162361
cg00242341	0.239973	0.000948022	0.000368165	2.57499	0.0176554	0.351815	0.837276	0.956437	0.119161
cg00242472	0.270025	0.00182199	0.000653714	2.78713	0.0110434	0.31354	0.679871	0.862966	0.183095
cg00242526	0.300588	-0.00177506	0.00059086	-3.0042	0.00675663	0.278367	0.659705	0.864038	0.204333
cg00242629	0.270694	0.0034012	0.00121825	2.79186	0.0109271	0.313096	0.308626	0.677888	0.369262
cg00242653	0.21325	-0.000345418	0.00014478	-2.38581	0.0265371	0.391891	0.90244	0.94329	0.0408495
cg00242772	0.403301	0.00251047	0.000666359	3.76744	0.00113135	0.195777	0.61496	0.808849	0.193889
cg00242795	0.202168	0.00151914	0.000658549	2.3068	0.0313522	0.410744	0.78017	0.948962	0.168792
cg00242951	0.174675	-0.00106351	0.000504462	-2.1082	0.0471998	0.460177	0.552219	0.701695	0.149476
cg00242965	0.377267	0.00150642	0.000422341	3.56684	0.00182099	0.21346	0.0576784	0.171354	0.113676
cg00243184	0.207191	0.000228493	9.75351e-05	2.34267	0.0290744	0.401837	0.0374938	0.0711337	0.03364
cg00244312	0.311662	0.00142268	0.000461378	3.08355	0.00563236	0.266482	0.166677	0.311795	0.145118
cg00244517	0.240559	0.00168926	0.000654974	2.57913	0.0174967	0.35094	0.310368	0.501614	0.191246
cg00245050	0.19265	0.000962638	0.000430031	2.23853	0.0361468	0.428039	0.10579	0.2267	0.120911
cg00245098	0.256888	0.00248947	0.000923961	2.69435	0.0135789	0.329117	0.504776	0.818868	0.314092
cg00245635	0.241627	0.000199768	7.723e-05	2.58667	0.0172109	0.349594	0.0263987	0.0482118	0.0218131
cg00245890	0.226792	0.00177158	0.000713813	2.48185	0.0216081	0.371108	0.606361	0.795207	0.188845
cg00246208	0.281162	-0.000289565	0.000101036	-2.86598	0.00924962	0.299534	0.939423	0.978337	0.0389145
cg00246402	0.239202	0.00045966	0.000178887	2.56955	0.0178664	0.352809	0.898003	0.953742	0.0557388
cg00247571	0.175608	0.000910156	0.000430329	2.11502	0.0465532	0.458524	0.800465	0.932309	0.131844
cg00247616	0.245984	-0.00201129	0.000768427	-2.61741	0.0160899	0.342953	0.268514	0.507797	0.239283
cg00247998	0.189904	0.00113743	0.000512645	2.21875	0.0376565	0.432471	0.713619	0.868267	0.154649
cg00248115	0.213066	0.00174175	0.000730444	2.3845	0.0266109	0.392253	0.670966	0.882717	0.211751
cg00248174	0.284239	0.000700323	0.000242511	2.8878	0.00880449	0.295901	0.320936	0.402881	0.0819449
cg00249264	0.184628	0.00107309	0.000492102	2.18062	0.0407291	0.441275	0.499379	0.624375	0.124996
cg00249357	0.246296	0.00224425	0.000856709	2.61962	0.0160121	0.342502	0.537794	0.778809	0.241014
cg00249511	0.324014	0.000939215	0.000296034	3.17266	0.00458514	0.256148	0.0532096	0.168279	0.11507
cg00249621	0.280142	0.000871396	0.000304817	2.85875	0.00940171	0.300837	0.138242	0.254102	0.11586
cg00250409	0.233572	0.00208795	0.000825347	2.52979	0.0194806	0.361687	0.255928	0.479422	0.223493
cg00250422	0.193415	0.00016272	7.25124e-05	2.24403	0.0357369	0.426536	0.0329991	0.0539101	0.020911
cg00250581	0.285975	0.00114838	0.000395978	2.90012	0.00856229	0.293653	0.779059	0.896351	0.117292
cg00250658	0.258446	0.00174499	0.000645016	2.70535	0.0132517	0.327134	0.513663	0.712033	0.19837
cg00250879	0.237816	-0.00222688	0.000869956	-2.55976	0.0182516	0.355007	0.322588	0.579373	0.256785
cg00251443	0.289467	0.00197892	0.000676568	2.92494	0.00809377	0.28959	0.704991	0.938368	0.233377
cg00251594	0.291062	-0.000302362	0.000102974	-2.93629	0.00788788	0.287835	0.945082	0.978425	0.0333427
cg00251622	0.225776	0.00175348	0.000708572	2.47466	0.0219452	0.372758	0.519714	0.715412	0.195699
cg00251716	0.203653	0.0025265	0.00109023	2.31741	0.0306617	0.408113	0.434062	0.796238	0.362176
cg00252069	0.210372	-0.0012957	0.000547786	-2.36534	0.0277147	0.396369	0.261038	0.430002	0.168964
cg00252149	0.235757	0.000824822	0.000324066	2.54523	0.0188382	0.358263	0.869164	0.960386	0.0912229
cg00252282	0.301117	0.00163809	0.000544581	3.00798	0.00669853	0.277879	0.0588805	0.214514	0.155633
cg00252543	0.204912	0.000831331	0.000357345	2.32641	0.0300875	0.405805	0.362411	0.471402	0.108991
cg00252594	0.480804	-0.00144955	0.000328705	-4.40989	0.000243835	0.156589	0.815751	0.930143	0.114392
cg00253126	0.20624	-0.00206875	0.000885638	-2.33589	0.029493	0.40336	0.33812	0.643767	0.305647
cg00253658	0.184184	0.00312771	0.00143644	2.17741	0.0409984	0.442013	0.327506	0.805916	0.47841
cg00253848	0.254347	0.00108576	0.000405677	2.67642	0.0141285	0.331636	0.177791	0.300863	0.123072
cg00253851	0.179426	0.000202618	9.4555e-05	2.14286	0.0439956	0.451021	0.033467	0.0652918	0.0318248
cg00254079	0.183428	0.000117177	5.39509e-05	2.17193	0.0414611	0.443276	0.0317218	0.0475246	0.0158028
cg00254181	0.239352	0.00202097	0.000786181	2.57061	0.0178249	0.352692	0.632563	0.870355	0.237792
cg00254415	0.185624	-0.000322224	0.00014728	-2.18783	0.0401311	0.439626	0.917295	0.960276	0.0429807
cg00254524	0.264781	0.00193713	0.000704391	2.75008	0.0119968	0.319457	0.197403	0.442516	0.245113
cg00254622	0.177183	0.000924991	0.000434979	2.12652	0.0454811	0.455325	0.106462	0.228834	0.122371
cg00254793	0.198266	0.00124382	0.000545805	2.27887	0.0332388	0.417586	0.662043	0.818537	0.156494
cg00255275	0.356739	0.00144635	0.000423819	3.41265	0.0026191	0.229126	0.734431	0.884133	0.149702
cg00255562	0.327549	0.00287756	0.000899721	3.19828	0.00432068	0.252709	0.407742	0.682139	0.274397
cg00255573	0.235681	0.00147999	0.000581599	2.54469	0.0188604	0.358371	0.522919	0.74363	0.220711
cg00255925	0.220368	0.000145233	5.96111e-05	2.43635	0.0238264	0.381007	0.0414166	0.0605062	0.0190896
cg00256231	0.306611	0.00162374	0.000532845	3.0473	0.00612157	0.272099	0.556084	0.738147	0.182063
cg00256294	0.18438	0.00195137	0.000895603	2.17883	0.0408791	0.44173	0.412334	0.711901	0.299567
cg00256463	0.255659	0.000649104	0.000241691	2.68568	0.0138421	0.330704	0.871037	0.949701	0.0786638
cg00256485	0.198323	0.000568717	0.000249516	2.27928	0.0332104	0.417423	0.767149	0.840325	0.0731762
cg00256632	0.216526	-0.000134832	5.5968e-05	-2.40909	0.0252548	0.386954	0.962444	0.977955	0.0155106
cg00257248	0.190491	0.0012409	0.000558214	2.22298	0.0373288	0.431345	0.721381	0.879366	0.157986
cg00257296	0.264662	0.00031956	0.000116236	2.74923	0.0120194	0.319531	0.0421908	0.0788339	0.0366431
cg00257789	0.219388	-0.00428447	0.00176359	-2.4294	0.0241833	0.382249	0.0212131	0.346819	0.325606
cg00257954	0.377484	0.00171952	0.000481864	3.56848	0.00181391	0.21338	0.740976	0.907554	0.166579
cg00258015	0.217363	-0.000250329	0.000103655	-2.41503	0.0249369	0.385567	0.926704	0.962284	0.0355802
cg00258165	0.242361	-0.00136096	0.000525092	-2.59185	0.017017	0.348692	0.031863	0.177407	0.145544
cg00259070	0.221548	0.000428811	0.000175403	2.44471	0.0234033	0.379349	0.913043	0.963938	0.0508945
cg00259083	0.252876	0.00240922	0.000903669	2.66604	0.0144563	0.333627	0.374351	0.658582	0.284231
cg00259097	0.296208	0.00137832	0.000463622	2.97294	0.00725654	0.283293	0.648201	0.784796	0.136595
cg00259111	0.282061	0.0026032	0.000906296	2.87235	0.00911746	0.298619	0.567129	0.877194	0.310065
cg00259345	0.181752	0.000956786	0.000443005	2.15977	0.0425049	0.446356	0.792113	0.914464	0.122352
cg00259367	0.271484	0.00149662	0.000534994	2.79745	0.0107912	0.312223	0.541997	0.722239	0.180241
cg00259887	0.294116	0.000262196	8.86386e-05	2.95803	0.00750722	0.284917	0.0247944	0.0491016	0.0243072
cg00260810	0.363116	0.00350997	0.00101438	3.4602	0.00234198	0.223948	0.332187	0.620867	0.288681
cg00261162	0.406722	0.000420733	0.000110886	3.79428	0.00106134	0.194196	0.023949	0.0593221	0.0353731
cg00261553	0.272192	0.000205239	7.32356e-05	2.80245	0.0106708	0.31099	0.0276376	0.0486152	0.0209776
cg00261591	0.176741	-0.000893713	0.000420909	-2.12329	0.0457797	0.456047	0.0309603	0.148797	0.117836
cg00261592	0.351683	0.00175827	0.000520946	3.37514	0.00286008	0.233624	0.484082	0.648687	0.164604
cg00261832	0.177828	0.00124854	0.000585836	2.13122	0.0450492	0.454331	0.565677	0.764911	0.199234
cg00263248	0.183563	0.00223839	0.00103014	2.17291	0.0413782	0.443061	0.369501	0.666296	0.296795
cg00263589	0.175267	0.001049	0.00049656	2.11253	0.0467888	0.459139	0.719058	0.864531	0.145474
cg00263650	0.224288	-0.000996792	0.000404522	-2.46412	0.0224484	0.37504	0.586008	0.69273	0.106722
cg00263700	0.227492	0.00178995	0.000719778	2.4868	0.0213787	0.370154	0.526111	0.7792	0.253089
cg00263923	0.270604	-0.000678433	0.000243059	-2.79123	0.0109427	0.313132	0.889264	0.958686	0.0694213
cg00264129	0.310016	-0.00201127	0.00065477	-3.07172	0.00578764	0.268242	0.352114	0.541867	0.189753
cg00264136	0.222247	-0.00137542	0.000561472	-2.44967	0.0231559	0.378204	0.435997	0.585718	0.149721
cg00264142	0.172212	0.0001999	9.5638e-05	2.09017	0.0489488	0.465019	0.0262295	0.0563045	0.030075
cg00264433	0.21036	0.000477388	0.000201835	2.36525	0.0277199	0.396369	0.0461813	0.104055	0.0578741
cg00264441	0.202087	0.00013895	6.02498e-05	2.30622	0.0313902	0.410843	0.0330669	0.0512775	0.0182107
cg00264650	0.257502	0.00208856	0.000773917	2.69868	0.013449	0.32837	0.377251	0.662173	0.284922
cg00264958	0.261914	-0.000706464	0.000258794	-2.72983	0.0125502	0.323017	0.852399	0.938944	0.0865454
cg00264994	0.212038	0.00212792	0.000895143	2.37719	0.0270273	0.39389	0.382875	0.683247	0.300372
cg00265304	0.39593	0.00129145	0.0003481	3.71001	0.0012969	0.200286	0.700061	0.825943	0.125882
cg00265634	0.185698	-0.000820184	0.000374793	-2.18837	0.0400873	0.43948	0.049026	0.151895	0.102869
cg00265826	0.337325	0.00295155	0.000902749	3.26951	0.00366115	0.244778	0.209163	0.498719	0.289556
cg00267122	0.341388	-0.000654094	0.000198254	-3.29928	0.00341556	0.241633	0.887231	0.958838	0.0716067
cg00267694	0.253492	0.00146154	0.000547313	2.67039	0.0143182	0.33284	0.576591	0.741851	0.16526
cg00267817	0.171116	0.00083784	0.000402396	2.08213	0.0497478	0.46721	0.158774	0.271651	0.112877
cg00267839	0.229746	0.00133358	0.000532848	2.50275	0.0206552	0.367157	0.462281	0.636854	0.174573
cg00268004	0.253508	0.000878483	0.000328958	2.6705	0.0143146	0.33281	0.476458	0.589112	0.112654
cg00268019	0.213776	-0.000440547	0.000184364	-2.38955	0.0263271	0.391121	0.115413	0.177392	0.0619791
cg00268086	0.2821	0.00264569	0.000921001	2.87263	0.00911168	0.298594	0.406708	0.678144	0.271436
cg00268409	0.173099	0.00250946	0.00119688	2.09667	0.0483122	0.463024	0.124146	0.384042	0.259896
cg00268755	0.30275	0.00256831	0.000850532	3.01965	0.00652195	0.276002	0.517373	0.813693	0.296319
cg00268953	0.189011	0.00139725	0.000631578	2.21231	0.03816	0.433886	0.222115	0.418715	0.1966
cg00268961	0.188181	-0.000345858	0.000156758	-2.20632	0.0386341	0.435173	0.870222	0.915841	0.0456197
cg00269416	0.349243	0.000414893	0.000123587	3.3571	0.0029836	0.235768	0.0261834	0.0652796	0.0390962
cg00269445	0.321487	-0.00154341	0.000489292	-3.15437	0.00478337	0.258167	0.684534	0.85906	0.174526
cg00269682	0.221123	-0.000302528	0.000123901	-2.4417	0.0235547	0.379863	0.939441	0.978379	0.0389389
cg00269767	0.462867	-0.000683483	0.000160669	-4.25399	0.000353974	0.163726	0.884885	0.943001	0.0581154
cg00270460	0.493259	-0.00195193	0.000431729	-4.52121	0.000186916	0.150554	0.423449	0.603183	0.179734
cg00270827	0.197992	0.00170653	0.000749496	2.2769	0.0333754	0.418021	0.668813	0.860986	0.192172
cg00271043	0.263861	0.00107898	0.000393276	2.74358	0.0121719	0.320476	0.346372	0.45651	0.110137
cg00271126	0.568584	-0.0027511	0.000522935	-5.26088	3.24562e-05	0.116279	0.228353	0.472392	0.244039
cg00271579	0.249833	-0.000854712	0.000323195	-2.64457	0.0151572	0.337457	0.404634	0.505051	0.100417
cg00271604	0.286928	-0.00292673	0.00100682	-2.9069	0.00843194	0.292735	0.494262	0.809183	0.314921
cg00273449	0.248381	0.000687779	0.000261083	2.63433	0.0155029	0.339357	0.134036	0.226252	0.0922158
cg00274051	0.292149	0.00180929	0.000614565	2.94402	0.00775042	0.286747	0.58809	0.79279	0.2047
cg00274550	0.182351	0.000468873	0.000216659	2.16411	0.0421292	0.445213	0.0498023	0.101917	0.0521148
cg00275126	0.234727	0.00153167	0.000603508	2.53795	0.0191385	0.35991	0.663961	0.850431	0.18647
cg00275425	0.244109	0.00167666	0.000643832	2.60418	0.0165636	0.345701	0.761712	0.95084	0.189128
cg00275503	0.178257	0.00128824	0.000603576	2.13435	0.0447638	0.453666	0.59607	0.762715	0.166646
cg00275645	0.183448	-0.000203959	9.39007e-05	-2.17207	0.0414487	0.443247	0.0263516	0.0509513	0.0245997
cg00275962	0.18291	0.000194734	8.98147e-05	2.16817	0.0417811	0.444248	0.0287486	0.0565895	0.0278409
cg00276510	0.234657	0.00213981	0.000843289	2.53746	0.019159	0.359953	0.656546	0.883898	0.227351
cg00276606	0.245175	0.000545389	0.000208825	2.61171	0.0162926	0.344264	0.0632332	0.121923	0.05869
cg00276799	0.206247	0.00151656	0.000649232	2.33594	0.0294899	0.40336	0.296369	0.50901	0.212641
cg00277039	0.183946	-0.000967054	0.000444483	-2.17568	0.0411436	0.442522	0.0679445	0.198557	0.130613
cg00277329	0.179575	0.00022754	0.000106132	2.14394	0.0438988	0.450758	0.013116	0.0447075	0.0315915
cg00277714	0.367915	0.00171613	0.000490857	3.49619	0.00215157	0.220266	0.596682	0.766563	0.169882
cg00277836	0.214206	0.000850146	0.000355322	2.39261	0.0261567	0.390488	0.818574	0.940148	0.121574
cg00278359	0.229503	0.00256306	0.0010248	2.50103	0.0207321	0.367501	0.402055	0.703516	0.301462
cg00278472	0.301036	0.00190273	0.000632683	3.0074	0.00670738	0.277953	0.644027	0.854292	0.210265
cg00278517	0.186996	0.00138742	0.000631288	2.19776	0.039321	0.437327	0.754386	0.91964	0.165254
cg00279669	0.193076	0.000700166	0.000312352	2.24159	0.0359181	0.42715	0.867252	0.952894	0.0856423
cg00279790	0.340159	0.000587797	0.000178647	3.29027	0.00348819	0.242667	0.0425204	0.107608	0.0650875
cg00280163	0.180665	-0.000243809	0.000113301	-2.15187	0.0431951	0.448653	0.0339987	0.0685503	0.0345516
cg00280461	0.173734	-0.00210563	0.00100205	-2.10132	0.0478607	0.461938	0.289203	0.599405	0.310201
cg00280504	0.184797	-0.000284362	0.000130331	-2.18184	0.0406273	0.44101	0.901934	0.938739	0.0368047
cg00280991	0.226332	0.000620001	0.000250142	2.47859	0.0217602	0.371964	0.0181323	0.0907067	0.0725745
cg00281323	0.209226	-0.000724014	0.000307153	-2.35717	0.0281973	0.398281	0.334498	0.409093	0.0745951
cg00281430	0.204154	0.000944853	0.00040709	2.32099	0.0304319	0.407195	0.822303	0.930617	0.108315
cg00281551	0.24372	0.001174	0.00045129	2.60144	0.0166634	0.346326	0.167104	0.285427	0.118323
cg00281776	0.246505	-0.000221496	8.4505e-05	-2.62109	0.0159604	0.342154	0.942769	0.9684	0.0256312
cg00282626	0.194001	0.000151666	6.74597e-05	2.24825	0.0354258	0.42551	0.0229569	0.041241	0.0182841
cg00283022	0.281935	0.00183163	0.000637874	2.87146	0.00913584	0.298779	0.600888	0.795632	0.194744
cg00283046	0.390522	-0.00366298	0.000998577	-3.6682	0.00143225	0.203857	0.390084	0.77584	0.385756
cg00283157	0.247525	-0.00139811	0.000531947	-2.62829	0.01571	0.340418	0.734642	0.881374	0.146732
cg00283284	0.17244	0.000154358	7.37905e-05	2.09184	0.0487843	0.464464	0.0212718	0.0397622	0.0184904
cg00283535	0.294305	0.000970816	0.000328048	2.95937	0.00748435	0.28488	0.80609	0.918998	0.112907
cg00283876	0.391974	-0.00201905	0.000548744	-3.6794	0.00139468	0.203265	0.650903	0.877281	0.226378
cg00283934	0.271953	-0.000839389	0.0002997	-2.80077	0.0107113	0.311466	0.0845896	0.17817	0.0935806
cg00283986	0.386404	0.00240772	0.000662089	3.63655	0.00154391	0.206569	0.602322	0.823375	0.221052
cg00284493	0.282355	-0.000242999	8.45381e-05	-2.87443	0.00907464	0.29832	0.942749	0.974599	0.0318492
cg00284516	0.179273	-0.00021815	0.000101856	-2.14175	0.0440953	0.45126	0.0404215	0.0712302	0.0308088
cg00284551	0.231906	0.00134789	0.000535299	2.51802	0.0199841	0.364061	0.472274	0.652522	0.180248
cg00285123	0.235614	0.00184561	0.000725416	2.54421	0.0188797	0.358432	0.645043	0.822544	0.1775
cg00285252	0.396356	-0.00120138	0.000323533	-3.71332	0.00128674	0.199961	0.826368	0.933699	0.107331
cg00285314	0.240676	0.000402818	0.000156134	2.57996	0.0174651	0.350845	0.0340451	0.083315	0.0492699
cg00285394	0.244768	0.00139528	0.000534828	2.60884	0.0163954	0.344879	0.70105	0.85925	0.1582
cg00285537	0.206345	0.0012612	0.000539749	2.33664	0.0294465	0.403221	0.471892	0.641192	0.169301
cg00285620	0.260874	0.00149233	0.000548149	2.72249	0.0127568	0.3243	0.499394	0.670247	0.170853
cg00286388	0.25429	-0.000307462	0.000114895	-2.67602	0.0141412	0.331664	0.925912	0.962548	0.0366357
cg00286701	0.400925	-0.00127759	0.000340792	-3.74887	0.00118245	0.197209	0.815414	0.92351	0.108096
cg00286773	0.452534	0.00337036	0.000808945	4.16636	0.000436511	0.168525	0.460893	0.724149	0.263256
cg00287009	0.207935	0.00137062	0.000583745	2.34797	0.0287507	0.400591	0.186758	0.412586	0.225827
cg00287012	0.207317	0.00147066	0.00062753	2.34357	0.0290195	0.401681	0.679132	0.842804	0.163672
cg00287016	0.200677	-0.00182667	0.000795541	-2.29613	0.0320607	0.413346	0.65622	0.872575	0.216355
cg00287312	0.21774	0.000140401	5.8072e-05	2.41771	0.0247948	0.385021	0.0294204	0.0482838	0.0188633
cg00287370	0.370865	0.00100589	0.000285893	3.51841	0.00204173	0.217371	0.0279823	0.120687	0.0927044
cg00287883	0.25215	0.00264841	0.000995299	2.66092	0.0146206	0.334214	0.46865	0.790212	0.321561
cg00288324	0.207503	0.0016614	0.000708518	2.3449	0.0289382	0.40141	0.283942	0.480011	0.196069
cg00288463	0.227345	0.00184745	0.000743212	2.48576	0.0214266	0.370393	0.463389	0.658767	0.195378
cg00288612	0.218222	0.00213561	0.000882072	2.42113	0.0246145	0.384209	0.473843	0.770815	0.296972
cg00288815	0.380134	-0.000703752	0.000196106	-3.58863	0.00172948	0.211648	0.902484	0.958768	0.0562843
cg00289249	0.412907	-0.000903609	0.000235125	-3.8431	0.000944809	0.190941	0.876444	0.962469	0.0860254
cg00289346	0.361845	-0.00148642	0.000430757	-3.45071	0.00239492	0.225146	0.0437397	0.17775	0.13401
cg00290023	0.28357	0.0011567	0.000401205	2.88306	0.00889949	0.296351	0.369451	0.511604	0.142153
cg00290086	0.17334	0.00149687	0.000713326	2.09844	0.0481402	0.462597	0.271672	0.470946	0.199274
cg00290106	0.198718	0.000433545	0.000189976	2.28211	0.0330148	0.41674	0.889753	0.947252	0.057499
cg00290158	0.210072	-0.0023766	0.00100567	-2.3632	0.0278402	0.39693	0.357813	0.607869	0.250055
cg00290218	0.298239	-0.00127872	0.000428033	-2.98742	0.00702063	0.281518	0.742117	0.899475	0.157358
cg00290994	0.388983	0.00212456	0.000581059	3.65636	0.00147307	0.204709	0.10065	0.310665	0.210015
cg00291192	0.256183	0.002878	0.00107014	2.68938	0.0137293	0.329985	0.52384	0.830773	0.306933
cg00291424	0.20464	0.000359077	0.000154477	2.32447	0.0302107	0.40625	0.0509657	0.0895882	0.0386226
cg00291765	0.216189	-0.00141162	0.000586537	-2.4067	0.025384	0.387319	0.317411	0.535651	0.218241
cg00291933	0.378748	0.00151195	0.000422557	3.57809	0.00177316	0.21248	0.220747	0.356962	0.136215
cg00292001	0.322391	0.00139659	0.000441832	3.1609	0.00471161	0.25762	0.289775	0.427279	0.137503
cg00292029	0.252703	0.00062298	0.000233779	2.66482	0.0144954	0.333704	0.0340509	0.102275	0.0682242
cg00292107	0.309296	0.00152864	0.000498488	3.06655	0.00585682	0.269272	0.503818	0.65877	0.154952
cg00292432	0.420331	0.00204624	0.000524373	3.90225	0.00082051	0.18692	0.518319	0.731381	0.213062
cg00292701	0.20207	0.000577374	0.000250368	2.3061	0.0313984	0.410855	0.126165	0.209889	0.0837244
cg00293191	0.172117	-0.00305591	0.00146252	-2.08948	0.0490177	0.465193	0.555904	0.928158	0.372255
cg00293517	0.249658	-0.000306155	0.000115821	-2.64334	0.0151986	0.337652	0.942787	0.975024	0.0322376
cg00293678	0.215399	-0.000302768	0.000126097	-2.40108	0.0256894	0.388507	0.924164	0.959214	0.03505
cg00293718	0.171117	0.00159983	0.000768359	2.08214	0.0497468	0.467206	0.377097	0.650902	0.273806
cg00293981	0.236118	-0.000653714	0.000256582	-2.54778	0.0187341	0.357777	0.808676	0.891983	0.0833071
cg00294149	0.317465	-0.00422119	0.00135064	-3.12532	0.00511542	0.260637	0.437045	0.81952	0.382475
cg00294382	0.418287	0.00142956	0.000367883	3.88591	0.000853127	0.188566	0.315122	0.428407	0.113286
cg00294572	0.207449	0.000197831	8.43807e-05	2.34451	0.0289617	0.401484	0.0342285	0.0596685	0.0254399
cg00294620	0.187947	0.000918006	0.0004164	2.20463	0.0387691	0.43566	0.742728	0.857848	0.11512
cg00294823	0.235946	0.000358852	0.000140917	2.54656	0.0187838	0.358068	0.0258469	0.0728972	0.0470502
cg00294830	0.192595	-0.000796782	0.000356003	-2.23813	0.0361766	0.428138	0.384747	0.515478	0.130731
cg00294885	0.211763	-0.000308792	0.000130005	-2.37523	0.0271395	0.394295	0.933488	0.971469	0.0379802
cg00294892	0.2617	-0.00170846	0.000626194	-2.72832	0.0125926	0.323217	0.466281	0.65494	0.18866
cg00294940	0.183361	0.000741342	0.000341405	2.17144	0.0415023	0.443276	0.708427	0.802894	0.0944679
cg00295161	0.369294	0.00184159	0.000525184	3.50657	0.00209958	0.219002	0.78475	0.937798	0.153048
cg00295259	0.227051	0.00264215	0.0010638	2.48368	0.021523	0.370764	0.434034	0.77106	0.337026
cg00295382	0.188296	0.00102079	0.000462491	2.20715	0.0385683	0.435092	0.774373	0.90186	0.127486
cg00295421	0.27033	0.000215096	7.71149e-05	2.78929	0.0109903	0.313377	0.0209356	0.0455542	0.0246187
cg00295572	0.186089	0.000609002	0.000277931	2.1912	0.0398549	0.438895	0.0312288	0.107386	0.0761571
cg00295771	0.205925	-0.00233083	0.000998795	-2.33364	0.0296329	0.404033	0.377836	0.694022	0.316186
cg00295780	0.229394	0.00206632	0.000826445	2.50026	0.0207667	0.367582	0.442134	0.723641	0.281507
cg00296038	0.194204	0.00126162	0.00056079	2.24971	0.0353183	0.425168	0.308223	0.483736	0.175512
cg00296458	0.31712	0.00105041	0.000336363	3.12283	0.00514488	0.260981	0.662089	0.773859	0.11177
cg00297099	0.217718	-0.00354081	0.00146463	-2.41755	0.0248034	0.385043	0.316965	0.779057	0.462092
cg00297584	0.194764	0.000292886	0.000129956	2.25374	0.0350243	0.424035	0.0393285	0.0752862	0.0359577
cg00297832	0.298388	0.00134027	0.000448478	2.98849	0.00700351	0.281231	0.791569	0.928808	0.137239
cg00297843	0.263912	-0.00074406	0.000271165	-2.74394	0.012162	0.320383	0.865849	0.93626	0.0704111
cg00297969	0.200885	-0.000312388	0.000135961	-2.29762	0.0319611	0.413005	0.923046	0.96928	0.0462339
cg00298405	0.185265	-0.00097024	0.000443997	-2.18524	0.0403455	0.440225	0.675896	0.808932	0.133036
cg00298906	0.300478	-0.000941969	0.000313633	-3.00342	0.00676877	0.278563	0.758578	0.863918	0.10534
cg00299396	0.175664	0.000714055	0.000337546	2.11543	0.0465147	0.458424	0.805833	0.934977	0.129145
cg00299893	0.208034	0.000834565	0.000355334	2.34868	0.0287081	0.400427	0.615584	0.70498	0.0893956
cg00299942	0.254984	0.00107619	0.000401425	2.68091	0.0139889	0.331119	0.806664	0.921308	0.114644
cg00299943	0.409197	0.00305833	0.000801919	3.81377	0.00101321	0.193487	0.161305	0.438905	0.2776
cg00299972	0.350856	0.00234694	0.000696625	3.36902	0.00290142	0.234419	0.266937	0.522923	0.255986
cg00300298	0.207333	0.0016075	0.000685884	2.34368	0.0290122	0.401635	0.296817	0.499676	0.202859
cg00300851	0.173829	0.000712417	0.000338921	2.10201	0.0477937	0.46168	0.778099	0.888864	0.110764
cg00301064	0.366222	0.00364288	0.00104576	3.48348	0.00221705	0.221833	0.525873	0.946814	0.42094
cg00301120	0.256532	0.00151152	0.000561518	2.69184	0.0136545	0.329629	0.67756	0.825257	0.147697
cg00301203	0.215493	-0.000426736	0.000177677	-2.40175	0.0256526	0.388375	0.0333073	0.0925474	0.0592401
cg00301390	0.211377	0.00077832	0.000328061	2.37248	0.0272981	0.394999	0.602558	0.710139	0.107582
cg00301576	0.283391	0.000684711	0.000237599	2.88179	0.00892507	0.296655	0.85884	0.95621	0.0973702
cg00301660	0.206515	0.00097716	0.000417974	2.33785	0.0293714	0.402903	0.251166	0.397909	0.146743
cg00301795	0.487941	0.00220253	0.000492366	4.47335	0.000209536	0.152943	0.125253	0.293338	0.168085
cg00301998	0.216206	0.000493415	0.000205007	2.40681	0.0253776	0.387319	0.891202	0.949314	0.0581122
cg00302379	0.309397	0.00142954	0.00046606	3.06728	0.00584705	0.26905	0.723224	0.865864	0.14264
cg00302587	0.228418	-0.000428651	0.000171917	-2.49335	0.0210786	0.369019	0.914691	0.963238	0.0485464
cg00302627	0.206107	-0.00071041	0.000304252	-2.33494	0.0295521	0.403712	0.653487	0.733095	0.0796073
cg00302983	0.239963	-0.000256625	9.96634e-05	-2.57492	0.0176582	0.351832	0.0457115	0.0780857	0.0323742
cg00303262	0.194212	-0.00116074	0.00051594	-2.24976	0.0353145	0.425163	0.766169	0.909962	0.143794
cg00303418	0.303236	-0.00162723	0.000538258	-3.02313	0.00647021	0.275699	0.760981	0.92312	0.162139
cg00303541	0.279264	0.00160413	0.000562353	2.85252	0.00953457	0.30182	0.104813	0.275172	0.170359
cg00303723	0.174927	-0.000348781	0.000165295	-2.11005	0.0470242	0.459743	0.0331301	0.0796045	0.0464745
cg00303740	0.182095	-0.00181704	0.000840346	-2.16225	0.0422895	0.445707	0.461318	0.751313	0.289995
cg00303811	0.177478	0.000528542	0.000248297	2.12867	0.045283	0.454926	0.887788	0.958297	0.0705092
cg00303908	0.34796	-0.00171951	0.000513649	-3.34763	0.0030505	0.237285	0.258854	0.42302	0.164165
cg00304844	0.191208	-0.00259332	0.00116389	-2.22815	0.0369319	0.430335	0.34107	0.725015	0.383945
cg00305188	0.374861	0.000270493	7.62252e-05	3.5486	0.00190121	0.214518	0.0551796	0.0780744	0.0228948
cg00305281	0.276471	0.00121609	0.000429299	2.83274	0.00996896	0.305294	0.0665723	0.206195	0.139623
cg00305740	0.243441	0.00276498	0.00106367	2.59947	0.0167353	0.34683	0.573431	0.895542	0.322111
cg00305993	0.192733	0.000954628	0.000426339	2.23913	0.0361021	0.427869	0.515119	0.64288	0.127761
cg00306851	0.238391	0.00304872	0.00118913	2.56382	0.0180908	0.354076	0.556524	0.86738	0.310856
cg00306909	0.301232	0.00229588	0.000763054	3.0088	0.00668593	0.277806	0.606237	0.855095	0.248859
cg00307066	0.23039	0.00137488	0.000548351	2.5073	0.0204531	0.36626	0.525183	0.685078	0.159895
cg00307276	0.228264	-0.000815229	0.000327104	-2.49227	0.0211281	0.369178	0.672324	0.765097	0.0927721
cg00307662	0.185327	-0.000613183	0.000280545	-2.18569	0.0403083	0.440142	0.724431	0.800035	0.0756041
cg00307818	0.200827	0.000991889	0.00043178	2.29721	0.0319887	0.413082	0.805675	0.942083	0.136408
cg00307819	0.215328	0.000571024	0.000237869	2.40058	0.0257169	0.388607	0.893054	0.966376	0.0733225
cg00308021	0.29694	0.001069	0.000358948	2.97816	0.00717068	0.28257	0.761935	0.872939	0.111003
cg00308460	0.184579	-0.00256844	0.00117804	-2.18027	0.0407587	0.441358	0.124081	0.553398	0.429317
cg00308479	0.176315	0.000744254	0.000351033	2.12018	0.046069	0.457025	0.829701	0.932395	0.102694
cg00308491	0.204068	-0.000742661	0.000320061	-2.32038	0.0304714	0.407366	0.846719	0.931757	0.0850387
cg00308560	0.27115	0.00250309	0.000895532	2.79509	0.0108484	0.312648	0.37498	0.69332	0.31834
cg00308650	0.336212	0.00155605	0.000477113	3.26138	0.00373116	0.245941	0.628369	0.773871	0.145502
cg00308667	0.186869	-0.00259384	0.00118071	-2.19684	0.0393952	0.437573	0.519133	0.885254	0.366121
cg00308680	0.231371	0.000632667	0.000251634	2.51423	0.0201484	0.364865	0.882536	0.961295	0.078759
cg00308697	0.364823	0.000843837	0.000242971	3.47299	0.00227251	0.222764	0.584048	0.667901	0.0838527
cg00308722	0.311723	-0.00147089	0.000476944	-3.08399	0.00562667	0.266405	0.205517	0.3335	0.127983
cg00308819	0.326429	-0.00354661	0.00111173	-3.19016	0.00440288	0.253757	0.371855	0.762743	0.390888
cg00309462	0.219721	0.000256196	0.000105354	2.43176	0.0240613	0.381825	0.028163	0.0580435	0.0298805
cg00310412	0.265632	-0.000936313	0.000339725	-2.75609	0.0118371	0.318623	0.309884	0.421244	0.111361
cg00310622	0.228994	0.00111143	0.00044503	2.49743	0.0208941	0.368259	0.698962	0.823135	0.124173
cg00311133	0.243932	-0.000903466	0.000347095	-2.60294	0.0166088	0.345963	0.846307	0.952688	0.106381
cg00311292	0.209349	-0.000495767	0.000210244	-2.35805	0.0281451	0.398114	0.905536	0.969583	0.0640476
cg00311303	0.323289	-0.00260928	0.000823793	-3.1674	0.00464126	0.256831	0.380948	0.663424	0.282476
cg00311371	0.219619	-0.00340967	0.00140256	-2.43103	0.0240989	0.381965	0.46536	0.894117	0.428757
cg00311883	0.239389	0.00157258	0.00061169	2.57087	0.0178149	0.352657	0.728884	0.896438	0.167554
cg00311984	0.281336	0.00206486	0.000720163	2.86721	0.00922383	0.299309	0.509648	0.742592	0.232944
cg00312594	0.279178	0.00108368	0.000379985	2.85191	0.0095478	0.302002	0.825869	0.941481	0.115612
cg00312625	0.177097	-0.000589963	0.000277513	-2.12589	0.0455388	0.455425	0.827563	0.904636	0.0770727
cg00313223	0.195121	0.000852929	0.000378021	2.2563	0.0348383	0.42331	0.661283	0.775915	0.114632
cg00313260	0.23288	-0.000463544	0.000183589	-2.5249	0.0196882	0.362391	0.90257	0.949923	0.0473526
cg00313401	0.171924	0.00028737	0.000137625	2.08806	0.0491574	0.465622	0.0525664	0.0958844	0.043318
cg00313533	0.260494	-0.00172645	0.000634771	-2.7198	0.0128331	0.32492	0.501764	0.72151	0.219746
cg00313545	0.183704	0.00175968	0.000809446	2.17393	0.0412915	0.44284	0.532394	0.781115	0.24872
cg00313795	0.195555	0.000224537	9.93786e-05	2.25941	0.0346135	0.422455	0.030909	0.0603903	0.0294813
cg00313973	0.282401	0.000227213	7.90374e-05	2.87476	0.00906796	0.298272	0.0318973	0.0544803	0.022583
cg00313981	0.347909	0.00144612	0.000432033	3.34725	0.00305321	0.237411	0.0643948	0.219862	0.155467
cg00314018	0.311396	0.000480675	0.00015598	3.08164	0.00565717	0.266751	0.0469652	0.102188	0.0552227
cg00314404	0.232788	0.00201691	0.000799013	2.52425	0.0197161	0.362527	0.544878	0.785631	0.240753
cg00314861	0.211688	0.000510006	0.000214767	2.3747	0.0271704	0.39438	0.867472	0.936464	0.0689916
cg00315394	0.260102	-0.00178028	0.000655228	-2.71704	0.0129124	0.325508	0.438129	0.611057	0.172928
cg00316080	0.175268	0.000414832	0.000196367	2.11254	0.0467879	0.459139	0.899568	0.957916	0.0583473
cg00316341	0.294477	0.00103189	0.000348541	2.9606	0.00746343	0.284745	0.772721	0.873901	0.10118
cg00316485	0.269933	0.00242559	0.000870482	2.78649	0.0110595	0.313664	0.151629	0.424358	0.272729
cg00316677	0.262359	0.000444179	0.000162526	2.73297	0.0124627	0.322369	0.0167564	0.0799049	0.0631485
cg00316800	0.186237	0.00184607	0.000842082	2.19227	0.0397675	0.438609	0.61788	0.859722	0.241842
cg00317246	0.309183	-0.000759336	0.000247684	-3.06575	0.00586771	0.269482	0.798362	0.885544	0.0871829
cg00317577	0.245531	0.00126401	0.000483515	2.61422	0.0162031	0.343677	0.55371	0.710047	0.156337
cg00317680	0.296982	0.000309552	0.00010393	2.97846	0.00716573	0.282558	0.040033	0.073375	0.033342
cg00318109	0.266109	-0.00330605	0.00119808	-2.75946	0.0117483	0.31798	0.287524	0.650431	0.362907
cg00318409	0.284515	-0.00390916	0.00135276	-2.88976	0.00876553	0.295591	0.423031	0.850353	0.427322
cg00318756	0.306199	-0.000821127	0.000269722	-3.04435	0.00616319	0.272534	0.0751375	0.164352	0.0892146
cg00319567	0.2014	-0.000471858	0.000205039	-2.30131	0.0317153	0.412081	0.106257	0.174843	0.0685851
cg00319692	0.239956	0.000932438	0.000362129	2.57488	0.0176599	0.351832	0.768952	0.876965	0.108013
cg00320027	0.278039	0.000428598	0.000150711	2.84384	0.00972297	0.303346	0.0291192	0.0760848	0.0469657
cg00320217	0.248093	0.000206663	7.85107e-05	2.6323	0.0155723	0.339677	0.949872	0.974743	0.0248705
cg00320288	0.248715	0.000260507	9.88009e-05	2.63669	0.0154226	0.33893	0.920748	0.956838	0.0360906
cg00320433	0.402656	0.000844663	0.000224501	3.7624	0.00114501	0.196278	0.839828	0.90899	0.0691618
cg00320453	0.223017	-0.000529863	0.00021582	-2.45512	0.0228867	0.376886	0.885253	0.951692	0.0664391
cg00320938	0.354122	0.00303945	0.000895744	3.39321	0.00274139	0.231175	0.205761	0.495888	0.290127
cg00320980	0.201728	0.00116242	0.0005046	2.30365	0.0315599	0.411614	0.466583	0.624911	0.158328
cg00321115	0.197804	-0.00161082	0.00070788	-2.27555	0.0334695	0.418364	0.600923	0.792537	0.191613
cg00321638	0.204466	0.00171787	0.000739434	2.32322	0.0302897	0.406522	0.737496	0.93443	0.196934
cg00321709	0.239134	-0.00608827	0.00236984	-2.56907	0.0178851	0.352839	0.086243	0.659714	0.573471
cg00321911	0.178385	0.00017021	7.9713e-05	2.13528	0.0446791	0.453433	0.954223	0.976002	0.0217784
cg00322000	0.215243	0.00134256	0.000559407	2.39997	0.0257501	0.388771	0.69738	0.855556	0.158177
cg00322698	0.246434	0.000880431	0.000335966	2.62059	0.015978	0.342261	0.810779	0.900928	0.0901485
cg00322919	0.31024	-0.000248873	8.09783e-05	-3.07333	0.00576632	0.268145	0.947635	0.97656	0.0289254
cg00323014	0.238849	0.00227719	0.000887079	2.56706	0.0179636	0.353219	0.59844	0.875867	0.277427
cg00323695	0.301768	0.000250232	8.30608e-05	3.01263	0.00662761	0.277098	0.0353233	0.057696	0.0223728
cg00324018	0.193823	0.00107713	0.000479369	2.24697	0.0355201	0.425821	0.113733	0.24539	0.131657
cg00324097	0.508089	0.00279204	0.000599495	4.65732	0.000135119	0.142439	0.297717	0.511482	0.213765
cg00324520	0.226956	-0.000985794	0.000397016	-2.48301	0.0215542	0.370941	0.760664	0.869534	0.10887
cg00324612	0.251862	0.00180442	0.000678636	2.65889	0.0146863	0.33447	0.664507	0.876534	0.212027
cg00324733	0.23993	0.000196078	7.61561e-05	2.57469	0.0176671	0.351838	0.0325973	0.0542294	0.0216321
cg00326300	0.195643	0.00111162	0.000491859	2.26004	0.0345681	0.42222	0.701275	0.852286	0.151011
cg00326842	0.280308	0.00258688	0.000904527	2.85992	0.00937684	0.300452	0.223563	0.513184	0.289621
cg00326946	0.301047	0.00191946	0.000638227	3.00748	0.00670616	0.27793	0.577797	0.79062	0.212823
cg00327072	0.224217	0.000543528	0.000220622	2.46362	0.0224726	0.375154	0.907649	0.969119	0.0614703
cg00327209	0.240325	0.0011146	0.000432439	2.57748	0.0175597	0.351381	0.83532	0.950201	0.114881
cg00327355	0.336861	0.00182965	0.00056019	3.26612	0.00369021	0.245239	0.612002	0.77328	0.161277
cg00328284	0.182841	-0.00197312	0.000910247	-2.16767	0.0418238	0.444299	0.290916	0.579729	0.288813
cg00328434	0.245215	0.0010655	0.000407928	2.61199	0.0162825	0.344231	0.803083	0.911498	0.108415
cg00328523	0.220238	0.00248541	0.00102053	2.43542	0.0238736	0.381221	0.409269	0.720153	0.310884
cg00328711	0.344369	-0.000214043	6.44481e-05	-3.32118	0.00324525	0.239747	0.953959	0.975398	0.0214392
cg00328901	0.270924	0.000341949	0.00012241	2.79349	0.0108874	0.312883	0.0097938	0.0535294	0.0437356
cg00329040	0.308608	0.00193301	0.000631367	3.06162	0.00592356	0.269875	0.6703	0.871138	0.200838
cg00329201	0.216564	0.00117744	0.000488693	2.40936	0.0252404	0.386908	0.345199	0.495468	0.15027
cg00329697	0.206615	0.00011664	4.9877e-05	2.33856	0.0293276	0.40286	0.0203143	0.0361045	0.0157903
cg00329943	0.173569	0.000360014	0.000171426	2.10011	0.0479776	0.462146	0.0533121	0.102388	0.0490759
cg00329988	0.212399	0.000256246	0.000107677	2.37976	0.0268802	0.393326	0.936471	0.968661	0.0321903
cg00330078	0.250748	0.002254	0.000850236	2.65103	0.0149432	0.336123	0.597905	0.809618	0.211713
cg00330375	0.200146	0.00205097	0.000894707	2.29234	0.0323165	0.41446	0.349766	0.614216	0.26445
cg00330501	0.423228	0.00272083	0.000693118	3.9255	0.000776236	0.184585	0.452251	0.672816	0.220565
cg00330518	0.178556	0.0007549	0.00035333	2.13653	0.0445659	0.453073	0.783116	0.890583	0.107467
cg00330546	0.239426	-0.000637906	0.000248103	-2.57113	0.0178047	0.352634	0.869813	0.948065	0.0782526
cg00330929	0.257276	0.00278345	0.00103202	2.69709	0.0134966	0.328685	0.131898	0.429229	0.297331
cg00332509	0.332556	0.0020624	0.000637585	3.2347	0.00397021	0.248818	0.39335	0.611568	0.218218
cg00332575	0.193905	-0.000186498	8.2978e-05	-2.24756	0.0354763	0.425679	0.0323612	0.0555355	0.0231743
cg00333703	0.21272	-0.000411471	0.000172739	-2.38204	0.0267505	0.39275	0.875761	0.924995	0.0492339
cg00333920	0.206678	0.00118916	0.000508402	2.33901	0.0292996	0.402718	0.799651	0.941605	0.141953
cg00333946	0.244502	0.00169203	0.000649043	2.60696	0.0164631	0.345252	0.529497	0.714193	0.184696
cg00334349	0.189406	0.00137686	0.000621565	2.21516	0.0379367	0.433306	0.665094	0.837362	0.172268
cg00334594	0.191574	0.000553252	0.000248008	2.23078	0.0367314	0.429845	0.849727	0.932054	0.0823264
cg00334961	0.361123	0.00115045	0.000333917	3.44531	0.00242553	0.225558	0.847447	0.951973	0.104527
cg00335252	0.186599	0.00172277	0.000784904	2.19488	0.0395541	0.437933	0.258772	0.483592	0.22482
cg00335360	0.193717	0.00146947	0.0006542	2.24621	0.0355761	0.42603	0.497621	0.67086	0.173238
cg00335444	0.172099	0.000146665	7.01966e-05	2.08934	0.0490307	0.465209	0.958568	0.979839	0.0212713
cg00335467	0.355161	0.00113205	0.000332866	3.40092	0.00269221	0.230456	0.711815	0.810522	0.0987069
cg00335712	0.251885	0.000311096	0.000116995	2.65905	0.0146812	0.33447	0.032932	0.0790801	0.0461481
cg00335757	0.379699	0.00138392	0.000385997	3.58532	0.00174308	0.212069	0.745055	0.885485	0.14043
cg00335892	0.373883	0.00179675	0.000507385	3.5412	0.00193476	0.215271	0.171771	0.321309	0.149538
cg00336022	0.196397	0.00149176	0.000658479	2.26546	0.0341807	0.420913	0.6818	0.898119	0.216318
cg00336149	0.201741	0.00140881	0.000611527	2.30375	0.0315535	0.411592	0.647313	0.815651	0.168338
cg00336220	0.295975	-0.0015896	0.000534989	-2.97128	0.00728401	0.283397	0.752393	0.907922	0.15553
cg00336593	0.294822	0.00141758	0.000478417	2.96306	0.00742175	0.284527	0.281106	0.419664	0.138557
cg00336946	0.236646	0.000339322	0.000132989	2.55151	0.0185827	0.356902	0.928666	0.970815	0.0421494
cg00337333	0.335598	0.00195132	0.000599135	3.25689	0.0037704	0.246463	0.199336	0.38581	0.186474
cg00337466	0.338769	0.00172002	0.000524382	3.28009	0.00357202	0.243697	0.075291	0.265823	0.190532
cg00337662	0.184831	0.000100599	4.6102e-05	2.18209	0.0406067	0.44097	0.0198718	0.0352718	0.0154001
cg00337828	0.387889	-0.000593894	0.000162802	-3.64794	0.00150276	0.205308	0.899021	0.956319	0.057298
cg00337957	0.186446	-0.000200766	9.15161e-05	-2.19378	0.0396442	0.438275	0.949902	0.97617	0.0262688
cg00338763	0.279852	0.0026761	0.000936784	2.85669	0.00944548	0.301136	0.524095	0.831424	0.307329
cg00339488	0.187531	-0.000969624	0.000440414	-2.20162	0.0390098	0.436338	0.121546	0.254809	0.133264
cg00339695	0.17616	0.00158883	0.000749783	2.11905	0.0461747	0.457351	0.506113	0.742278	0.236165
cg00339726	0.196537	0.000672731	0.00029682	2.26647	0.0341092	0.420723	0.860319	0.935218	0.0748991
cg00339806	0.310357	-0.00063155	0.000205437	-3.07417	0.00575514	0.267985	0.890994	0.95192	0.0609265
cg00340102	0.242947	0.000315824	0.000121659	2.59598	0.0168636	0.34774	0.048383	0.0890626	0.0406796
cg00340161	0.233869	-0.00097739	0.000386032	-2.53189	0.0193919	0.361324	0.793158	0.908798	0.11564
cg00340225	0.227749	0.000228774	9.19281e-05	2.48862	0.0212951	0.369954	0.942462	0.972108	0.0296459
cg00340328	0.296455	0.000865362	0.000290907	2.9747	0.0072274	0.283012	0.878533	0.96326	0.084727
cg00340584	0.222123	0.00157799	0.000644396	2.44879	0.0231998	0.378388	0.580575	0.779619	0.199044
cg00340928	0.184277	-0.000642425	0.00029495	-2.17808	0.040942	0.441815	0.829315	0.912543	0.0832286
cg00341072	0.195934	0.000652625	0.0002885	2.26213	0.0344181	0.421799	0.863308	0.939424	0.0761157
cg00341191	0.218822	0.000705049	0.000290696	2.42538	0.0243916	0.383198	0.869295	0.948532	0.0792364
cg00341204	0.237686	-0.00132758	0.000518817	-2.55885	0.0182879	0.35526	0.70173	0.847741	0.146011
cg00341243	0.176602	-0.000762247	0.000359165	-2.12228	0.045874	0.456387	0.0795603	0.199982	0.120422
cg00341732	0.228029	0.00178171	0.000715371	2.4906	0.021204	0.369519	0.456339	0.691984	0.235645
cg00342313	0.181958	-0.000595735	0.000275642	-2.16126	0.0423752	0.445949	0.869879	0.943189	0.0733098
cg00342415	0.323521	-0.00352058	0.00111092	-3.16908	0.00462324	0.256718	0.362367	0.677836	0.315468
cg00342530	0.32849	0.00155696	0.000485772	3.20512	0.0042527	0.252137	0.483439	0.618792	0.135352
cg00342532	0.378194	0.000499577	0.000139786	3.57388	0.00179091	0.212863	0.0382297	0.0780347	0.039805
cg00342684	0.180925	0.000892782	0.000414523	2.15376	0.0430295	0.448063	0.438656	0.561947	0.123291
cg00343063	0.285614	-0.000834021	0.000287835	-2.89757	0.00861205	0.293986	0.523509	0.607717	0.0842076
cg00343078	0.195787	0.000605919	0.000267978	2.26108	0.0344936	0.421971	0.892757	0.959409	0.0666519
cg00343092	0.333985	0.000336233	0.000103612	3.24512	0.00387514	0.247791	0.0372292	0.0697429	0.0325137
cg00343633	0.19988	0.000192029	8.38395e-05	2.29043	0.0324454	0.414898	0.0174643	0.0444011	0.0269368
cg00344270	0.192558	0.000452272	0.000202099	2.23787	0.0361963	0.428177	0.885146	0.961757	0.0766112
cg00344411	0.304781	0.00157706	0.000519761	3.03419	0.00630835	0.274166	0.5566	0.70487	0.14827
cg00344652	0.251476	0.000155112	5.83969e-05	2.65616	0.014775	0.335037	0.0277337	0.0490859	0.0213522
cg00344655	0.257346	0.00152425	0.000565045	2.69758	0.013482	0.328576	0.45322	0.611021	0.1578
cg00344709	0.263741	0.00263162	0.000959488	2.74273	0.0121949	0.320602	0.634537	0.903894	0.269357
cg00344766	0.225686	0.000847974	0.000342752	2.47402	0.0219756	0.372849	0.783692	0.88973	0.106039
cg00345025	0.230022	0.000639702	0.000255401	2.5047	0.0205684	0.366816	0.825519	0.919599	0.0940792
cg00345366	0.208055	-0.0012819	0.000545761	-2.34883	0.0286991	0.400396	0.471957	0.659216	0.187259
cg00345375	0.180526	-0.000452634	0.000210443	-2.15086	0.0432845	0.448934	0.89707	0.955515	0.0584451
cg00345425	0.238506	0.00131672	0.000513413	2.56464	0.0180588	0.353787	0.714231	0.880425	0.166194
cg00345744	0.176932	-0.00131995	0.000621244	-2.12469	0.0456501	0.455797	0.428623	0.578589	0.149966
cg00346074	0.26567	0.00105838	0.000383979	2.75635	0.01183	0.318561	0.810247	0.947577	0.13733
cg00346256	0.181743	-0.000675772	0.0003129	-2.1597	0.0425103	0.446364	0.786492	0.866713	0.080221
cg00346557	0.256714	0.00113259	0.000420548	2.69312	0.0136159	0.329404	0.760784	0.885648	0.124864
cg00346985	0.209541	0.00140836	0.000596913	2.35941	0.0280641	0.397745	0.346634	0.562857	0.216223
cg00347247	0.245991	0.0002327	8.89029e-05	2.61746	0.0160881	0.342953	0.0149624	0.0491719	0.0342095
cg00347452	0.216331	-0.00128058	0.000531866	-2.4077	0.0253295	0.387218	0.071485	0.24353	0.172045
cg00347546	0.195282	0.000219716	9.73291e-05	2.25745	0.0347549	0.422974	0.0231784	0.0541358	0.0309574
cg00347563	0.28909	0.00321058	0.00109866	2.92226	0.00814326	0.290005	0.0734675	0.370318	0.296851
cg00347584	0.478857	-0.000752859	0.000171388	-4.39272	0.000254048	0.156976	0.859135	0.930341	0.071206
cg00347616	0.262815	0.00019929	7.28348e-05	2.73619	0.0123738	0.321772	0.0249566	0.0470209	0.0220643
cg00347643	0.286471	-0.00304333	0.0010481	-2.90365	0.00849416	0.293256	0.250063	0.524821	0.274758
cg00347677	0.304822	0.00121642	0.000400864	3.03448	0.00630412	0.274166	0.0961455	0.218574	0.122429
cg00347882	0.192234	0.00052347	0.000234158	2.23554	0.0363715	0.428854	0.857887	0.929949	0.0720626
cg00347981	0.171867	-0.00109245	0.000523293	-2.08764	0.049199	0.46572	0.0475702	0.200227	0.152657
cg00348124	0.220043	0.00201009	0.000825825	2.43404	0.0239443	0.381375	0.45135	0.716553	0.265202
cg00348168	0.227621	-0.00209938	0.0008439	-2.48772	0.0213366	0.370047	0.383304	0.624414	0.24111
cg00348538	0.277478	-0.000348343	0.000122662	-2.83987	0.00981034	0.303871	0.914106	0.960929	0.0468224
cg00349061	0.236666	0.00285177	0.00111762	2.55165	0.018577	0.35688	0.429418	0.722379	0.292961
cg00349780	0.264683	-0.000606237	0.000220499	-2.74938	0.0120154	0.319531	0.862102	0.925269	0.0631678
cg00349975	0.327355	0.00135344	0.000423361	3.19688	0.00433477	0.252848	0.548812	0.661181	0.112369
cg00350074	0.294277	-0.00198471	0.000670697	-2.95918	0.00748765	0.284915	0.173088	0.403547	0.230459
cg00350861	0.377412	0.00258051	0.000723251	3.56794	0.00181626	0.21346	0.218869	0.445629	0.22676
cg00351190	0.171903	-0.00214176	0.00102579	-2.08791	0.0491728	0.465645	0.3346	0.609435	0.274836
cg00351202	0.199151	-0.00103476	0.000452807	-2.28521	0.0328017	0.415871	0.657952	0.797327	0.139376
cg00351750	0.219114	0.00138286	0.000569673	2.42746	0.0242838	0.382747	0.700103	0.877598	0.177494
cg00352690	0.182929	0.000486731	0.000224475	2.16831	0.0417693	0.444191	0.836335	0.913151	0.0768159
cg00353773	0.236028	0.00275507	0.00108163	2.54714	0.0187602	0.357951	0.114424	0.435402	0.320979
cg00354381	0.239374	0.00233223	0.000907212	2.57076	0.0178191	0.352689	0.489692	0.74085	0.251158
cg00354736	0.182881	0.000260882	0.000120335	2.16796	0.041799	0.444284	0.938191	0.970765	0.0325739
cg00355212	0.275975	0.00018655	6.59368e-05	2.82922	0.0100482	0.305982	0.0245911	0.0434114	0.0188202
cg00355609	0.313234	0.00132885	0.000429376	3.09485	0.00548776	0.264309	0.799095	0.925011	0.125916
cg00355673	0.301155	0.000481501	0.00016006	3.00825	0.0066943	0.277879	0.0196255	0.0766945	0.057069
cg00355909	0.254293	0.000229325	8.56956e-05	2.67604	0.0141404	0.331664	0.0262046	0.0500295	0.023825
cg00356208	0.188174	0.00111826	0.000506856	2.20627	0.0386384	0.435192	0.549129	0.678978	0.129849
cg00356435	0.311146	0.00358858	0.00116518	3.07984	0.00568058	0.267087	0.209509	0.503939	0.29443
cg00356875	0.196974	-0.000481338	0.00021208	-2.2696	0.0338871	0.419912	0.902185	0.963946	0.0617607
cg00357221	0.209823	0.000778369	0.000329619	2.36142	0.0279452	0.397264	0.779706	0.871431	0.0917249
cg00357543	0.307231	0.00108588	0.000355824	3.05174	0.00605947	0.27127	0.429857	0.529637	0.0997799
cg00357663	0.177301	0.00139158	0.00065413	2.12738	0.0454015	0.4552	0.259548	0.466122	0.206574
cg00357860	0.224854	0.00224216	0.000908446	2.46813	0.0222558	0.374208	0.498426	0.757713	0.259287
cg00357904	0.285904	-0.00262658	0.000905835	-2.89962	0.00857205	0.293684	0.705048	0.943365	0.238317
cg00358516	0.432204	-0.000823285	0.000205917	-3.99814	0.000652611	0.180977	0.868434	0.941544	0.0731099
cg00358936	0.203533	0.00108637	0.000468961	2.31656	0.030717	0.408336	0.621018	0.754828	0.133809
cg00359285	0.217262	-0.00132647	0.000549418	-2.41431	0.0249752	0.385729	0.634241	0.811027	0.176785
cg00359471	0.331912	-0.0029932	0.000926685	-3.23001	0.00401377	0.249305	0.555034	0.835953	0.280919
cg00359495	0.270616	0.00174601	0.000625516	2.79131	0.0109406	0.313132	0.0416265	0.238707	0.19708
cg00359997	0.188707	0.000719285	0.000325452	2.21011	0.0383334	0.434255	0.779178	0.854649	0.075471
cg00360175	0.261464	0.000381358	0.000139863	2.72665	0.0126392	0.323416	0.920165	0.972065	0.0519002
cg00360176	0.17284	0.00146472	0.000699227	2.09478	0.0484969	0.463633	0.269349	0.481685	0.212336
cg00360246	0.250272	-0.000735044	0.000277619	-2.64767	0.0150542	0.336811	0.850003	0.936273	0.0862703
cg00360256	0.319661	0.00114508	0.000364539	3.14117	0.00493156	0.258827	0.339283	0.461779	0.122496
cg00360324	0.219478	-0.000207592	8.54277e-05	-2.43003	0.0241505	0.382164	0.952531	0.977663	0.0251321
cg00360761	0.190883	0.0016483	0.000740538	2.22581	0.0371111	0.430678	0.730145	0.926529	0.196384
cg00361146	0.189993	0.000599427	0.000270086	2.21939	0.0376065	0.43227	0.0661058	0.142376	0.0762701
cg00361164	0.199105	0.00205757	0.000900517	2.28488	0.0328242	0.41598	0.65614	0.887437	0.231296
cg00361343	0.176863	0.000886122	0.00041716	2.12418	0.0456973	0.455837	0.0521812	0.192106	0.139925
cg00361399	0.213022	0.000594919	0.000249527	2.38419	0.0266288	0.392291	0.847244	0.91771	0.0704664
cg00361898	0.219839	0.000629354	0.000258717	2.4326	0.0240183	0.381697	0.832619	0.915373	0.0827545
cg00362812	0.335554	0.00163809	0.000503012	3.25657	0.00377322	0.246463	0.718576	0.89805	0.179474
cg00362854	0.402436	0.00131385	0.000349366	3.76068	0.00114971	0.196346	0.721567	0.823383	0.101816
cg00363301	0.294974	-0.000219137	7.39294e-05	-2.96414	0.0074035	0.284527	0.946726	0.968407	0.0216811
cg00363312	0.266918	0.00168802	0.000610458	2.76517	0.0115994	0.31688	0.329403	0.540775	0.211372
cg00363382	0.333825	0.00145111	0.000447327	3.24395	0.00388568	0.247838	0.100157	0.223002	0.122845
cg00363486	0.308106	0.0007545	0.000246728	3.05802	0.00597279	0.27041	0.0353942	0.120732	0.0853375
cg00363815	0.23335	-0.000975932	0.000386015	-2.52822	0.0195468	0.361874	0.702105	0.815267	0.113162
cg00365487	0.175079	-0.00113992	0.000539952	-2.11116	0.0469186	0.459488	0.227671	0.390034	0.162363
cg00365569	0.222374	0.000689328	0.000281294	2.45056	0.0231116	0.377913	0.0261624	0.102419	0.076257
cg00365642	0.192032	0.00200337	0.000896731	2.23408	0.0364814	0.42911	0.690604	0.92911	0.238506
cg00365672	0.259831	0.0038893	0.00143246	2.71513	0.0129672	0.325742	0.0692115	0.472841	0.40363
cg00365963	0.282974	-0.00175265	0.000608808	-2.87883	0.00898501	0.297454	0.733624	0.928927	0.195303
cg00366255	0.323225	-0.00151351	0.000477908	-3.16694	0.00464619	0.256855	0.807947	0.956772	0.148825
cg00366359	0.180823	0.00112083	0.000520589	2.15301	0.0430946	0.448276	0.354697	0.488548	0.133851
cg00366413	0.230672	0.00112336	0.00044768	2.50929	0.0203649	0.365795	0.492089	0.641877	0.149788
cg00366659	0.262902	0.00171618	0.000627075	2.73681	0.0123569	0.321668	0.496698	0.698883	0.202184
cg00367281	0.183582	0.00137991	0.000635013	2.17305	0.0413663	0.443045	0.473534	0.681992	0.208458
cg00367297	0.172112	-0.000657051	0.000314463	-2.08944	0.0490215	0.465199	0.864942	0.947367	0.0824255
cg00367567	0.172516	0.000374552	0.000179006	2.0924	0.0487296	0.464327	0.91714	0.96262	0.04548
cg00368259	0.242256	0.00187162	0.000722326	2.59111	0.0170445	0.348862	0.437315	0.642637	0.205322
cg00369142	0.252206	-0.00174294	0.000654917	-2.66132	0.0146079	0.33418	0.273164	0.482538	0.209374
cg00369181	0.229347	0.00141685	0.000566755	2.49993	0.0207816	0.36764	0.53429	0.70617	0.17188
cg00369228	0.269332	0.00116528	0.000418829	2.78224	0.0111652	0.314508	0.798535	0.917534	0.118999
cg00369333	0.200248	-0.00149694	0.00065281	-2.29307	0.0322672	0.414184	0.527752	0.704641	0.176889
cg00369658	0.194779	0.00111612	0.000495208	2.25384	0.0350165	0.42403	0.0844316	0.213131	0.1287
cg00369811	0.22992	0.000267922	0.000106999	2.50398	0.0206005	0.366974	0.0458404	0.0835579	0.0377176
cg00369852	0.220829	0.000580428	0.000237918	2.43962	0.0236602	0.380237	0.0196098	0.0980605	0.0784507
cg00370106	0.243573	0.00113402	0.000436093	2.6004	0.0167013	0.346641	0.75748	0.876593	0.119113
cg00370123	0.363093	0.00163783	0.000473356	3.46004	0.0023429	0.224002	0.695527	0.854161	0.158633
cg00370227	0.234831	-0.000284711	0.000112149	-2.53869	0.0191079	0.359726	0.931292	0.96467	0.0333778
cg00370293	0.383102	0.0010985	0.000304186	3.61128	0.0016392	0.209657	0.0702295	0.184788	0.114558
cg00370748	0.197066	0.00105772	0.000465903	2.27026	0.0338405	0.419723	0.432024	0.56629	0.134266
cg00371430	0.206345	0.00112957	0.000483419	2.33664	0.0294466	0.403221	0.736968	0.899756	0.162788
cg00372278	0.228667	-0.000206592	8.27986e-05	-2.49511	0.0209986	0.368702	0.026904	0.0537066	0.0268026
cg00373061	0.273696	-0.00382281	0.00135893	-2.81309	0.010419	0.308878	0.295293	0.669119	0.373826
cg00373275	0.266721	-0.00154773	0.000560005	-2.76378	0.0116355	0.317201	0.729976	0.923641	0.193664
cg00374015	0.208014	-0.000636647	0.000271083	-2.34853	0.0287169	0.400451	0.878929	0.939491	0.0605615
cg00374658	0.364095	-0.00101961	0.000294045	-3.46753	0.00230192	0.223055	0.829862	0.906917	0.0770551
cg00374688	0.237972	0.0011803	0.000460897	2.56087	0.0182076	0.354753	0.0607288	0.212576	0.151847
cg00375140	0.205145	-0.00215087	0.000923887	-2.32807	0.0299825	0.405383	0.566167	0.846353	0.280186
cg00375145	0.195343	-0.000813588	0.000360331	-2.25789	0.0347231	0.422818	0.778893	0.878188	0.0992948
cg00375340	0.335383	0.00318025	0.000976939	3.25533	0.00378417	0.246463	0.409404	0.835801	0.426397
cg00375799	0.237943	0.00117162	0.000457544	2.56066	0.0182158	0.354814	0.528959	0.653906	0.124947
cg00375819	0.17622	0.000942419	0.000444644	2.11949	0.0461337	0.457232	0.0447756	0.184759	0.139983
cg00375983	0.184222	0.00111174	0.000510517	2.17768	0.0409754	0.441925	0.509265	0.668658	0.159393
cg00376064	0.185179	0.00228598	0.0010464	2.18461	0.0403972	0.440348	0.575252	0.862159	0.286906
cg00376199	0.197175	0.000520497	0.000229189	2.27104	0.0337857	0.41953	0.893579	0.974336	0.0807571
cg00376288	0.172541	0.000999318	0.000477553	2.09258	0.048712	0.464257	0.822284	0.953106	0.130823
cg00376321	0.172045	-0.000211513	0.000101253	-2.08895	0.0490699	0.465311	0.937397	0.973422	0.0360256
cg00376480	0.329319	0.000918015	0.000285884	3.21114	0.00419362	0.251564	0.840113	0.918527	0.0784145
cg00376544	0.199002	0.000127206	5.56912e-05	2.28414	0.0328749	0.416184	0.0271585	0.0431734	0.0160148
cg00376553	0.425177	0.00196746	0.000499204	3.94119	0.000747686	0.184067	0.561895	0.756972	0.195077
cg00376954	0.499573	-0.00392368	0.000856947	-4.57867	0.000162972	0.145172	0.613545	0.900872	0.287327
cg00377133	0.228581	0.000161627	6.47934e-05	2.49451	0.0210263	0.368702	0.022176	0.0410443	0.0188683
cg00377239	0.196359	-0.000449858	0.000198596	-2.26519	0.0342	0.420942	0.90087	0.956043	0.0551726
cg00377320	0.273089	0.0012246	0.000435987	2.8088	0.0105199	0.30959	0.0922108	0.220138	0.127927
cg00378717	0.175999	0.000134656	6.35806e-05	2.11787	0.0462851	0.457627	0.0234542	0.0399332	0.016479
cg00379126	0.177742	0.000675804	0.000317191	2.13059	0.0451067	0.45456	0.825086	0.910743	0.0856568
cg00379615	0.279992	0.000792066	0.000277171	2.85768	0.00942435	0.301009	0.794332	0.877617	0.0832848
cg00380086	0.196154	0.000567663	0.000250767	2.26371	0.0343052	0.421205	0.879194	0.943104	0.0639096
cg00380176	0.247216	-0.00213031	0.000811206	-2.62611	0.0157855	0.341061	0.229857	0.463059	0.233202
cg00380574	0.313447	-0.00213346	0.000689019	-3.09638	0.00546842	0.264068	0.309847	0.512129	0.202281
cg00380924	0.537858	0.00455306	0.000920974	4.94374	6.84601e-05	0.125458	0.275568	0.600068	0.3245
cg00381753	0.412213	0.000604679	0.000157567	3.83761	0.000957261	0.191648	0.908463	0.952893	0.0444302
cg00381755	0.300603	0.00153665	0.000511483	3.0043	0.00675503	0.278334	0.191975	0.347701	0.155727
cg00381968	0.201544	0.00122317	0.000531275	2.30234	0.031647	0.411849	0.503771	0.662385	0.158614
cg00382138	0.297073	0.00317812	0.0010668	2.9791	0.00715518	0.282479	0.2064	0.536067	0.329667
cg00382227	0.285415	-0.000244253	8.43372e-05	-2.89615	0.00863975	0.294206	0.956873	0.984757	0.0278843
cg00382633	0.219432	-0.000443507	0.000182535	-2.42971	0.0241672	0.382237	0.912139	0.97473	0.0625916
cg00383006	0.197118	-0.000457494	0.000201483	-2.27063	0.0338143	0.419675	0.882133	0.937702	0.0555693
cg00383020	0.233902	-0.000576401	0.000227635	-2.53212	0.0193821	0.361228	0.879998	0.962327	0.0823291
cg00383117	0.276367	0.000264223	9.32989e-05	2.832	0.00998558	0.305398	0.940836	0.970388	0.0295524
cg00383197	0.412901	0.00143212	0.000372651	3.84306	0.000944911	0.190941	0.369192	0.497565	0.128373
cg00383244	0.277005	0.000808492	0.000285029	2.83652	0.00988456	0.304451	0.851289	0.931713	0.0804243
cg00383763	0.20378	0.0019122	0.00082482	2.31833	0.030603	0.407942	0.592273	0.81715	0.224877
cg00383923	0.188132	0.00127949	0.000580016	2.20596	0.0386627	0.435296	0.628227	0.773367	0.14514
cg00384455	0.414128	-0.00163629	0.000424703	-3.85279	0.000923238	0.190563	0.734938	0.859521	0.124582
cg00384487	0.186684	-0.00104528	0.000476099	-2.1955	0.0395039	0.437813	0.743279	0.889795	0.146516
cg00384539	0.25576	0.000208002	7.74282e-05	2.68639	0.0138203	0.33061	0.0282526	0.0527933	0.0245408
cg00384840	0.486042	0.00190245	0.000426905	4.45638	0.000218202	0.15398	0.0387892	0.196167	0.157378
cg00385011	0.290705	0.00148473	0.000506086	2.93374	0.00793358	0.288169	0.672846	0.833867	0.161021
cg00385246	0.298713	0.00205789	0.000688071	2.99081	0.00696655	0.28075	0.588814	0.796876	0.208062
cg00385863	0.39403	0.00334265	0.000904571	3.69529	0.00134305	0.201754	0.0723309	0.361204	0.288873
cg00386007	0.350664	0.00193743	0.000575314	3.3676	0.00291109	0.234447	0.654729	0.838359	0.183631
cg00386013	0.182354	-0.00223992	0.00103501	-2.16414	0.0421268	0.445211	0.456139	0.763427	0.307288
cg00386051	0.175467	0.00149198	0.000705762	2.11399	0.0466501	0.458737	0.567836	0.758952	0.191117
cg00386101	0.272126	0.000660262	0.000235641	2.80199	0.010682	0.31109	0.885757	0.959993	0.074236
cg00386141	0.336749	0.00187958	0.000575621	3.26531	0.00369724	0.245363	0.434894	0.620473	0.185579
cg00386329	0.231178	0.000691125	0.000275034	2.51287	0.020208	0.365172	0.781827	0.87733	0.0955027
cg00386668	0.186186	0.00126393	0.000576638	2.1919	0.0397974	0.438658	0.769137	0.946444	0.177307
cg00386961	0.219172	-0.00233034	0.000959832	-2.42787	0.0242626	0.382638	0.221348	0.509441	0.288093
cg00387115	0.21086	0.00105951	0.000447277	2.3688	0.0275119	0.395851	0.0550332	0.171533	0.1165
cg00387702	0.395037	0.00125967	0.000340166	3.70309	0.0013184	0.2009	0.0855883	0.22183	0.136241
cg00388861	0.310605	0.00181681	0.000590649	3.07596	0.0057316	0.267695	0.700034	0.87374	0.173707
cg00389406	0.27216	-0.000733614	0.000261797	-2.80223	0.0106762	0.311048	0.873039	0.939957	0.0669178
cg00389614	0.301452	0.000866539	0.000287851	3.01038	0.00666189	0.277649	0.878571	0.961	0.0824292
cg00389672	0.17672	0.00210912	0.000993395	2.12314	0.0457938	0.456094	0.407976	0.653576	0.2456
cg00389785	0.197439	-0.000737105	0.000324296	-2.27294	0.0336524	0.41896	0.72095	0.815461	0.0945116
cg00390049	0.301447	0.00109234	0.000362862	3.01034	0.00666249	0.277655	0.700781	0.804667	0.103886
cg00390654	0.33127	-0.000335889	0.000104141	-3.22534	0.00405763	0.249919	0.9351	0.968465	0.0333654
cg00390714	0.37054	0.0013474	0.000383224	3.51596	0.00205357	0.217625	0.624482	0.753389	0.128908
cg00390735	0.289665	0.000180575	6.17067e-05	2.92635	0.00806802	0.289361	0.0309307	0.0522407	0.02131
cg00390775	0.30697	0.000261883	8.58669e-05	3.04987	0.00608553	0.271692	0.0470683	0.0730251	0.0259568
cg00391247	0.1935	0.00109866	0.000489457	2.24465	0.0356912	0.426373	0.443743	0.593316	0.149573
cg00391379	0.279612	-0.00247228	0.000865951	-2.85499	0.00948175	0.301547	0.414735	0.711846	0.297111
cg00391562	0.240013	0.00108519	0.000421387	2.57528	0.0176444	0.351733	0.784672	0.935408	0.150737
cg00391977	0.469531	0.00141635	0.000328519	4.31133	0.000308615	0.161111	0.381587	0.490687	0.1091
cg00392075	0.200453	-0.000629522	0.000274358	-2.29453	0.0321684	0.413812	0.872096	0.957525	0.0854292
cg00392914	0.207194	0.000270678	0.000115542	2.34269	0.0290733	0.401837	0.042041	0.0846757	0.0426347
cg00393504	0.199902	0.00272358	0.00118903	2.29059	0.0324348	0.414882	0.568084	0.935551	0.367468
cg00393528	0.260957	-0.00100254	0.000368166	-2.72307	0.0127402	0.324266	0.716329	0.842484	0.126155
cg00393673	0.248155	0.00211454	0.000803173	2.63273	0.0155573	0.339615	0.621576	0.856984	0.235409
cg00393825	0.307518	0.000413552	0.000135422	3.0538	0.00603088	0.271086	0.0663657	0.102824	0.0364586
cg00393837	0.17866	0.000205849	9.63133e-05	2.13728	0.0444974	0.452857	0.0428059	0.0726316	0.0298257
cg00393957	0.335924	0.00269037	0.000825449	3.25928	0.0037495	0.246309	0.403949	0.671813	0.267863
cg00394040	0.244252	0.000267977	0.000102863	2.60519	0.016527	0.345496	0.0432371	0.0767874	0.0335504
cg00394616	0.177216	0.00081836	0.000384792	2.12676	0.045459	0.455253	0.841333	0.952143	0.11081
cg00394823	0.215762	0.0017413	0.000724435	2.40366	0.0255485	0.387925	0.464778	0.658163	0.193386
cg00394830	0.232811	0.000441852	0.000175032	2.52441	0.0197091	0.362464	0.0530384	0.103786	0.0507476
cg00395579	0.199553	-0.00258118	0.00112809	-2.28809	0.0326048	0.415143	0.371064	0.706243	0.335179
cg00395929	0.215252	-0.00115538	0.000481401	-2.40004	0.0257465	0.388769	0.676299	0.824203	0.147904
cg00396101	0.223825	-0.000781435	0.000317547	-2.46085	0.022607	0.375768	0.749416	0.866088	0.116672
cg00396730	0.222332	0.00161562	0.000659364	2.45027	0.0231262	0.37799	0.716687	0.898749	0.182062
cg00396899	0.20509	0.00136655	0.000587086	2.32767	0.0300074	0.405444	0.511889	0.662742	0.150852
cg00396966	0.288892	0.000896168	0.000306817	2.92085	0.00816921	0.290499	0.851553	0.95478	0.103227
cg00397179	0.418224	0.0019407	0.000499486	3.8854	0.00085416	0.188566	0.216844	0.364716	0.147871
cg00397287	0.178523	0.000686243	0.000321232	2.13628	0.044588	0.453129	0.852365	0.942734	0.0903691
cg00397522	0.220028	0.00213552	0.000877393	2.43393	0.0239498	0.381375	0.468898	0.705274	0.236376
cg00397575	0.180992	0.000621464	0.000288483	2.15425	0.0429864	0.447922	0.0889372	0.183434	0.0944971
cg00397673	0.17833	0.000172185	8.06534e-05	2.13488	0.0447154	0.453502	0.0321414	0.0555044	0.023363
cg00397739	0.212528	0.000570832	0.000239777	2.38068	0.026828	0.393036	0.895276	0.970373	0.0750972
cg00397911	0.320965	0.00299298	0.000949974	3.15059	0.00482533	0.258574	0.515792	0.823119	0.307327
cg00397976	0.223431	-0.000160925	6.54686e-05	-2.45805	0.0227429	0.37633	0.0244111	0.0416064	0.0171953
cg00398030	0.484549	-0.00208025	0.000468199	-4.44309	0.000225244	0.154211	0.38398	0.568606	0.184625
cg00398420	0.385584	0.00248665	0.000684977	3.63026	0.00156708	0.207588	0.461478	0.689179	0.227702
cg00399115	0.316704	0.0002262	7.25036e-05	3.11984	0.00518057	0.261225	0.0243612	0.0494858	0.0251246
cg00399160	0.251067	-0.00139642	0.0005263	-2.65328	0.0148691	0.335561	0.68636	0.834291	0.147931
cg00399354	0.216111	0.00176791	0.000734749	2.40614	0.0254142	0.387439	0.535417	0.759704	0.224287
cg00399378	0.177861	0.000193561	9.08113e-05	2.13146	0.0450269	0.454329	0.950421	0.971013	0.0205919
cg00399407	0.243278	0.00228945	0.000881125	2.59832	0.0167775	0.347117	0.174913	0.429857	0.254945
cg00399483	0.182441	0.000346448	0.00016004	2.16477	0.0420727	0.445054	0.0641157	0.108624	0.0445081
cg00399614	0.176686	-0.00232427	0.00109486	-2.1229	0.0458166	0.456179	0.364215	0.719891	0.355676
cg00400028	0.40941	0.00173398	0.000454463	3.81545	0.00100916	0.193238	0.319321	0.483771	0.164451
cg00400226	0.176209	0.000475791	0.000224492	2.11941	0.0461409	0.457246	0.899122	0.953184	0.0540619
cg00400547	0.342709	-0.00331347	0.00100136	-3.30898	0.00333909	0.240652	0.446632	0.759575	0.312943
cg00400632	0.197065	0.000137838	6.07148e-05	2.27026	0.033841	0.419723	0.00848632	0.0251525	0.0166661
cg00400987	0.285003	-0.00184313	0.000637051	-2.89323	0.00869709	0.294753	0.618784	0.793672	0.174888
cg00401433	0.176053	0.00286653	0.00135324	2.11827	0.0462477	0.457576	0.361934	0.759523	0.39759
cg00401463	0.427477	0.00228555	0.000577194	3.95976	0.000715259	0.182832	0.31192	0.506838	0.194919
cg00401491	0.237623	0.000795444	0.000310914	2.55841	0.0183056	0.355302	0.828312	0.926442	0.0981303
cg00401721	0.228232	-0.00189367	0.000759889	-2.49204	0.0211386	0.369234	0.732596	0.942907	0.210311
cg00402420	0.182347	0.000461963	0.000213468	2.16409	0.0421312	0.445226	0.881256	0.944441	0.0631852
cg00402801	0.218252	0.00102034	0.000421395	2.42134	0.0246033	0.384152	0.821105	0.930803	0.109699
cg00403579	0.265541	0.00300005	0.00108877	2.75544	0.0118541	0.318698	0.479104	0.823388	0.344284
cg00404077	0.201421	0.00132238	0.000574581	2.30146	0.0317052	0.412059	0.726449	0.885009	0.15856
cg00404400	0.23419	0.000810601	0.00031987	2.53416	0.0192967	0.360686	0.0663923	0.161714	0.0953212
cg00404999	0.202138	-0.00181065	0.000784993	-2.30658	0.0313665	0.410798	0.281748	0.545709	0.26396
cg00405043	0.200839	-0.000302584	0.000131713	-2.29729	0.0319829	0.413061	0.92597	0.961864	0.0358935
cg00405044	0.334801	0.00131774	0.000405324	3.25108	0.00382179	0.246995	0.77445	0.904823	0.130373
cg00405190	0.209157	0.000320146	0.000135846	2.35668	0.0282268	0.398352	0.924089	0.960084	0.0359957
cg00405824	0.182866	0.00201317	0.000928648	2.16785	0.0418085	0.444284	0.589699	0.886725	0.297026
cg00405939	0.228969	0.00105315	0.000421724	2.49725	0.020902	0.368286	0.799584	0.910208	0.110625
cg00406098	0.278192	0.00105728	0.000371636	2.84493	0.00969915	0.303217	0.847931	0.952019	0.104088
cg00406411	0.355249	0.00194298	0.0005712	3.40157	0.00268811	0.230456	0.205626	0.374775	0.169149
cg00406621	0.477322	0.00191371	0.000436998	4.37923	0.000262372	0.157599	0.202247	0.38381	0.181563
cg00407457	0.29548	0.000691227	0.000232913	2.96775	0.00734292	0.283939	0.0399227	0.117413	0.07749
cg00407962	0.244658	0.000382829	0.000146787	2.60806	0.0164235	0.345008	0.0230312	0.0801113	0.0570801
cg00408168	0.207443	-0.00173794	0.000741296	-2.34446	0.0289646	0.401506	0.624597	0.875567	0.25097
cg00408260	0.235851	-0.000669307	0.000262897	-2.54589	0.0188112	0.358162	0.863573	0.933303	0.0697298
cg00408315	0.176532	0.00198682	0.000936397	2.12177	0.0459215	0.45651	0.456828	0.745325	0.288497
cg00408623	0.341433	0.00175715	0.000532532	3.29961	0.00341293	0.241633	0.404786	0.571259	0.166473
cg00408747	0.306635	-0.000688524	0.000225933	-3.04747	0.00611913	0.272056	0.817238	0.892953	0.0757152
cg00408776	0.235597	0.00074338	0.000292199	2.54409	0.0188848	0.358466	0.803215	0.917944	0.114729
cg00409104	0.210229	0.00076508	0.000323595	2.36432	0.0277745	0.396637	0.641266	0.730596	0.0893298
cg00409171	0.305838	-0.000214355	7.04708e-05	-3.04176	0.00619985	0.272953	0.954277	0.974802	0.0205255
cg00409590	0.197115	0.00100389	0.000442122	2.27061	0.0338159	0.419681	0.351159	0.499135	0.147976
cg00410199	0.171338	-0.000402017	0.000192929	-2.08376	0.0495847	0.466773	0.0512751	0.106154	0.0548789
cg00410459	0.26241	0.00112454	0.000411417	2.73333	0.0124528	0.322281	0.370685	0.47542	0.104735
cg00410467	0.219935	0.000352286	0.000144779	2.43328	0.0239835	0.381533	0.0305397	0.0737022	0.0431625
cg00410483	0.421027	0.00184408	0.000471894	3.90783	0.000809664	0.186214	0.425485	0.596699	0.171214
cg00410576	0.186951	0.00016317	7.42549e-05	2.19743	0.0393476	0.437469	0.0296419	0.0471327	0.0174908
cg00410753	0.182578	-0.000839841	0.000387781	-2.16576	0.0419876	0.444774	0.643614	0.733122	0.0895081
cg00410951	0.308706	0.000580983	0.00018972	3.06232	0.00591408	0.269805	0.888758	0.94868	0.0599222
cg00411107	0.217312	0.00223877	0.000927156	2.41466	0.0249564	0.385629	0.438099	0.724759	0.28666
cg00411203	0.448369	0.0028917	0.000699924	4.13145	0.000474518	0.172307	0.618195	0.831592	0.213397
cg00411413	0.328156	0.00301583	0.000941655	3.20269	0.00427672	0.252284	0.480545	0.811288	0.330743
cg00411647	0.217159	0.000555683	0.000230232	2.41358	0.0250141	0.385909	0.895	0.959551	0.0645513
cg00411843	0.264626	0.00154128	0.000560674	2.74898	0.0120262	0.319531	0.247799	0.431374	0.183575
cg00412142	0.249228	-0.000619005	0.000234445	-2.6403	0.0153004	0.338091	0.89864	0.961626	0.0629862
cg00412308	0.181312	0.000518593	0.000240471	2.15657	0.0427829	0.44737	0.852928	0.91776	0.0648316
cg00412534	0.189994	0.0015345	0.000691404	2.2194	0.0376058	0.43227	0.272	0.440057	0.168057
cg00413544	0.28956	0.00109937	0.000375777	2.9256	0.00808171	0.289529	0.520344	0.648633	0.128288
cg00413617	0.187342	0.000623796	0.00028351	2.20026	0.0391193	0.436695	0.0591579	0.135347	0.076189
cg00414093	0.195404	-0.000821046	0.000363564	-2.25833	0.0346916	0.422696	0.545851	0.653906	0.108056
cg00414153	0.306245	-0.00106388	0.000349424	-3.04467	0.00615855	0.272534	0.745802	0.84852	0.102718
cg00414835	0.372081	0.00178594	0.00050628	3.52758	0.00199799	0.215908	0.371036	0.562479	0.191443
cg00414868	0.178032	-0.000654899	0.000307075	-2.1327	0.0449135	0.454033	0.761828	0.845345	0.0835163
cg00415424	0.23879	0.000828879	0.000322943	2.56664	0.0179801	0.35335	0.535773	0.638866	0.103093
cg00416475	0.261085	-0.00043754	0.000160626	-2.72397	0.0127147	0.324036	0.909299	0.963857	0.0545581
cg00416538	0.340104	0.00143146	0.000435111	3.28986	0.00349146	0.242801	0.688282	0.842053	0.153771
cg00416797	0.212931	-0.00104676	0.000439161	-2.38354	0.0266655	0.392477	0.611409	0.764681	0.153272
cg00416802	0.262117	0.00142345	0.000521171	2.73126	0.0125104	0.322771	0.640953	0.798515	0.157562
cg00417025	0.253377	0.000664741	0.000249006	2.66958	0.0143438	0.332982	0.812397	0.88886	0.0764636
cg00417151	0.171039	-0.000540295	0.000259562	-2.08156	0.0498044	0.467358	0.23651	0.312088	0.0755788
cg00417207	0.29351	-0.000564415	0.000191087	-2.95371	0.00758141	0.285385	0.884602	0.945419	0.0608169
cg00417231	0.242015	0.00119005	0.000459584	2.58941	0.0171079	0.349152	0.564071	0.697018	0.132947
cg00417288	0.171169	0.000443884	0.000213147	2.08252	0.0497086	0.467088	0.886248	0.954377	0.0681294
cg00417714	0.193656	0.00190553	0.0008485	2.24577	0.0356084	0.426099	0.669351	0.903446	0.234094
cg00417735	0.210921	0.00167651	0.000707614	2.36924	0.0274865	0.39573	0.539536	0.763608	0.224072
cg00417823	0.316164	0.00102009	0.000327377	3.11595	0.00522727	0.261583	0.485494	0.576219	0.0907257
cg00417990	0.253089	-0.00292161	0.00109524	-2.66755	0.0144084	0.333406	0.220478	0.506287	0.285809
cg00418313	0.29645	-0.000767064	0.000257866	-2.97467	0.007228	0.283012	0.872193	0.946087	0.0738948
cg00418511	0.191711	0.000234027	0.000104862	2.23177	0.0366565	0.429596	0.0176867	0.0508317	0.033145
cg00418575	0.27737	0.00121997	0.000429704	2.8391	0.00982726	0.303982	0.668846	0.810104	0.141258
cg00418799	0.265828	0.00196751	0.000713518	2.75747	0.0118005	0.318355	0.521062	0.784482	0.263419
cg00418913	0.328073	0.00178988	0.000558974	3.20209	0.00428268	0.252284	0.736261	0.964562	0.228301
cg00418943	0.244895	0.00177592	0.0006805	2.60973	0.0163633	0.344591	0.148247	0.35609	0.207843
cg00419040	0.200062	0.000193482	8.44259e-05	2.29173	0.0323574	0.414611	0.0238441	0.0457581	0.0219141
cg00419159	0.191946	0.00148759	0.000666045	2.23346	0.0365281	0.429242	0.598038	0.78254	0.184501
cg00419883	0.257575	0.00243382	0.000901682	2.6992	0.0134337	0.328311	0.302735	0.563784	0.261048
cg00420018	0.193567	-0.000585158	0.000260635	-2.24513	0.0356558	0.426232	0.858107	0.950694	0.0925869
cg00420300	0.192875	0.000307598	0.000137312	2.24015	0.0360259	0.427498	0.899465	0.952338	0.0528721
cg00420391	0.188583	0.000970933	0.000439492	2.20922	0.0384041	0.434492	0.246806	0.361176	0.11437
cg00420715	0.187947	0.000195202	8.8542e-05	2.20463	0.0387689	0.43566	0.0235743	0.0535028	0.0299286
cg00421335	0.313487	0.00241787	0.000780797	3.09667	0.00546481	0.264012	0.54059	0.782788	0.242198
cg00421829	0.364102	0.0029728	0.000857309	3.46759	0.0023016	0.223055	0.38663	0.637384	0.250754
cg00422037	0.389355	0.00107585	0.000294011	3.65922	0.00146311	0.204709	0.755465	0.865344	0.109878
cg00422120	0.209542	0.000804052	0.000340784	2.35942	0.0280638	0.397745	0.120952	0.225992	0.10504
cg00422452	0.18573	0.00250785	0.00114587	2.1886	0.0400682	0.439416	0.541263	0.88757	0.346306
cg00422566	0.21399	-0.00100616	0.000420797	-2.39107	0.0262421	0.390834	0.80284	0.919106	0.116265
cg00422673	0.325127	0.000819688	0.000257706	3.18072	0.00450032	0.254979	0.858687	0.946395	0.0877086
cg00422840	0.318887	0.00233819	0.000745695	3.13559	0.00499561	0.259393	0.642415	0.875304	0.232889
cg00423055	0.274704	-0.000670258	0.000237661	-2.82023	0.0102533	0.307546	0.880917	0.964892	0.083975
cg00423871	0.230592	-0.000486155	0.000193785	-2.50873	0.0203898	0.365909	0.89017	0.959455	0.0692847
cg00424064	0.352632	0.00268391	0.000793549	3.38216	0.00281337	0.232736	0.232141	0.466686	0.234545
cg00424166	0.249416	0.000889101	0.000336572	2.64163	0.0152557	0.337758	0.832537	0.939816	0.107279
cg00424353	0.171311	0.00278205	0.00133524	2.08356	0.0496046	0.466818	0.460823	0.799098	0.338274
cg00424367	0.48698	0.00282441	0.0006326	4.46476	0.000213881	0.153687	0.464792	0.717681	0.252889
cg00425361	0.189108	-0.00038058	0.000171974	-2.21301	0.0381049	0.433742	0.899209	0.954694	0.0554851
cg00425750	0.182898	0.00119827	0.000552685	2.16808	0.0417887	0.444269	0.745381	0.903922	0.158542
cg00425764	0.242003	-0.00146161	0.000564476	-2.58933	0.0171111	0.349152	0.0874768	0.263447	0.17597
cg00426709	0.370816	0.00136358	0.000387596	3.51803	0.00204353	0.217429	0.810163	0.93066	0.120496
cg00426822	0.314024	0.00190005	0.000612814	3.10054	0.00541631	0.263501	0.350058	0.515568	0.16551
cg00426916	0.18367	-0.000302393	0.000139116	-2.17368	0.0413122	0.442885	0.92955	0.968766	0.0392162
cg00427150	0.176944	0.000318659	0.000149973	2.12478	0.0456421	0.455772	0.924608	0.96525	0.0406419
cg00427223	0.172854	0.00054598	0.000260626	2.09487	0.0484873	0.463626	0.0574182	0.140916	0.0834981
cg00427800	0.268161	0.000196391	7.07984e-05	2.77395	0.011374	0.315722	0.0106355	0.0294944	0.0188588
cg00428179	0.411089	0.0021891	0.000571758	3.82871	0.00097777	0.191729	0.693726	0.884262	0.190536
cg00428334	0.282847	0.00182129	0.00063285	2.87792	0.00900334	0.297674	0.561512	0.783622	0.22211
cg00428349	0.205119	0.00230191	0.000988844	2.32789	0.0299941	0.4054	0.564022	0.82543	0.261409
cg00428568	0.30742	0.00177198	0.000580388	3.05309	0.00604069	0.27109	0.551467	0.721568	0.170101
cg00429105	0.208175	-0.00127894	0.000544304	-2.34968	0.0286473	0.400105	0.755404	0.910494	0.15509
cg00429497	0.193204	0.00115153	0.000513497	2.24252	0.0358493	0.426904	0.254603	0.415524	0.160922
cg00429618	0.226373	0.00233168	0.000940615	2.47889	0.0217465	0.371898	0.25932	0.524991	0.265671
cg00429622	0.194614	-0.000814498	0.000361573	-2.25265	0.0351032	0.424355	0.808641	0.917529	0.108888
cg00430389	0.203125	0.000988194	0.000427116	2.31364	0.0309054	0.408909	0.752725	0.872526	0.1198
cg00430559	0.359341	0.00167224	0.000487246	3.43202	0.00250254	0.226587	0.324308	0.454643	0.130335
cg00431050	0.198809	0.000978361	0.000428587	2.28276	0.0329699	0.416599	0.23802	0.356176	0.118156
cg00431549	0.249594	0.000432766	0.000163747	2.64289	0.0152136	0.337734	0.0363025	0.0829697	0.0466672
cg00431767	0.270974	-0.00120522	0.000431385	-2.79384	0.0108787	0.312862	0.206499	0.319767	0.113269
cg00431895	0.188609	0.000201467	9.1186e-05	2.20941	0.0383889	0.434451	0.936452	0.968697	0.032245
cg00432454	0.238232	-0.00105237	0.00041065	-2.56271	0.018135	0.354393	0.526643	0.672423	0.14578
cg00432578	0.182269	0.000382953	0.000177005	2.16352	0.0421803	0.445368	0.907167	0.961713	0.0545457
cg00432789	0.177439	0.000613772	0.000288375	2.12838	0.0453094	0.454986	0.839416	0.933021	0.0936051
cg00433654	0.449893	0.00107925	0.000260425	4.1442	0.000460275	0.170944	0.205978	0.292429	0.086451
cg00434010	0.261284	0.00247469	0.000908018	2.72538	0.012675	0.323635	0.295336	0.587661	0.292325
cg00434020	0.353738	0.00210173	0.000619914	3.39036	0.00275979	0.231572	0.64717	0.879948	0.232778
cg00435082	0.196004	0.000350842	0.000155059	2.26264	0.0343817	0.421585	0.0161036	0.0633783	0.0472747
cg00435245	0.291778	0.000600935	0.000204304	2.94138	0.0077971	0.287298	0.881264	0.945095	0.0638315
cg00435490	0.258834	-0.000316677	0.000116937	-2.70809	0.0131715	0.32687	0.935738	0.967321	0.0315836
cg00435692	0.313029	0.00178108	0.000575773	3.09338	0.00550637	0.264496	0.62493	0.782001	0.157071
cg00436420	0.234295	-0.000336151	0.000132609	-2.5349	0.0192657	0.360501	0.920122	0.970505	0.0503833
cg00436435	0.293184	0.000559337	0.000189517	2.95139	0.00762156	0.285639	0.886884	0.946909	0.0600251
cg00436874	0.461947	-0.000533251	0.000125585	-4.24613	0.000360693	0.164504	0.926495	0.970858	0.0443622
cg00437228	0.240623	-0.000842424	0.000326573	-2.57958	0.0174793	0.350925	0.851398	0.949527	0.0981287
cg00437432	0.222839	0.000904394	0.00036856	2.45386	0.0229487	0.37716	0.0407793	0.173089	0.13231
cg00438026	0.29227	-0.000961839	0.000326614	-2.94488	0.00773523	0.286501	0.39317	0.498146	0.104976
cg00438215	0.306444	-0.00142712	0.000468507	-3.0461	0.00613844	0.272299	0.0896382	0.216818	0.127179
cg00438569	0.461591	-0.000959543	0.000226143	-4.24309	0.000363328	0.164504	0.861784	0.951873	0.0900889
cg00438740	0.211766	0.00234333	0.00098656	2.37525	0.0271385	0.394291	0.460406	0.712284	0.251878
cg00438852	0.211709	-0.000260737	0.000109791	-2.37485	0.0271616	0.394371	0.935837	0.963231	0.0273932
cg00438885	0.381932	0.00439378	0.0012197	3.60234	0.00167427	0.210255	0.371492	0.710334	0.338843
cg00439318	0.228368	-0.0027954	0.0011213	-2.493	0.0210946	0.369121	0.664716	0.955373	0.290657
cg00439465	0.287001	0.0026027	0.000895193	2.90741	0.00842207	0.292604	0.554097	0.828078	0.273982
cg00439630	0.244116	0.000865239	0.000332243	2.60423	0.0165617	0.345701	0.053497	0.164337	0.11084
cg00440105	0.34984	0.00145873	0.00043395	3.36151	0.00295294	0.235186	0.691685	0.854914	0.163229
cg00440232	0.348057	-0.00173394	0.000517849	-3.34834	0.00304541	0.237214	0.385825	0.575253	0.189428
cg00440538	0.186195	0.000755203	0.000344533	2.19197	0.039792	0.438647	0.762815	0.863102	0.100287
cg00441434	0.249392	0.000589335	0.000223109	2.64146	0.0152613	0.337758	0.0557788	0.125354	0.0695753
cg00441725	0.224851	0.00108854	0.00044104	2.46811	0.0222567	0.37421	0.703456	0.845177	0.141721
cg00441754	0.262538	-0.000877664	0.000320991	-2.73423	0.0124279	0.32214	0.382886	0.486511	0.103625
cg00442389	0.347565	0.000663186	0.000198279	3.34472	0.00307137	0.237517	0.893216	0.954381	0.0611645
cg00442570	0.337252	-0.00108701	0.000332522	-3.26898	0.00366569	0.244838	0.786665	0.888443	0.101778
cg00442621	0.215205	0.00120913	0.000503864	2.39971	0.0257646	0.388786	0.815341	0.95324	0.137899
cg00442674	0.213042	0.00218454	0.000916206	2.38433	0.0266206	0.392279	0.678165	0.951857	0.273692
cg00443194	0.236338	0.000861017	0.000337743	2.54933	0.018671	0.357509	0.703418	0.823097	0.11968
cg00443307	0.175445	0.000493979	0.000233689	2.11383	0.0466655	0.458776	0.838314	0.904719	0.0664046
cg00443981	0.212563	0.00076305	0.000320485	2.38092	0.0268139	0.393012	0.842465	0.921936	0.0794712
cg00445405	0.312486	0.00116152	0.000375959	3.08947	0.00555611	0.265354	0.410492	0.560968	0.150476
cg00445475	0.35842	0.00178907	0.000522331	3.42516	0.00254323	0.227633	0.346211	0.485199	0.138988
cg00445548	0.231399	-0.0115032	0.00457487	-2.51443	0.0201399	0.36483	0.119653	0.950385	0.830732
cg00446003	0.270828	0.000380919	0.000136393	2.79281	0.0109039	0.313011	0.918575	0.964451	0.0458756
cg00446123	0.338845	0.0010054	0.000306464	3.28064	0.00356743	0.243693	0.873317	0.955172	0.0818556
cg00446414	0.277801	0.00218322	0.000768154	2.84216	0.00975992	0.303624	0.0792582	0.308206	0.228948
cg00446488	0.199928	-0.00136988	0.000597998	-2.29077	0.0324224	0.414879	0.666509	0.818286	0.151777
cg00446697	0.216169	0.00209564	0.000870805	2.40655	0.0253917	0.387319	0.304451	0.564436	0.259985
cg00446807	0.34022	-0.00115449	0.000350834	-3.29072	0.00348453	0.24256	0.665503	0.755275	0.0897711
cg00447208	0.272228	0.0020317	0.000724907	2.80271	0.0106646	0.31094	0.592817	0.833382	0.240565
cg00447385	0.230214	0.000843143	0.000336442	2.50606	0.0205081	0.366494	0.8509	0.951296	0.100396
cg00447494	0.296767	0.00206257	0.000692854	2.97692	0.00719088	0.282791	0.475459	0.698437	0.222978
cg00447581	0.308607	0.000392879	0.000128324	3.06161	0.00592369	0.269875	0.934367	0.968212	0.0338454
cg00448292	0.244442	0.000728279	0.000279405	2.60654	0.0164783	0.345259	0.854704	0.930372	0.0756678
cg00448560	0.276722	0.00197372	0.000696316	2.83451	0.00992929	0.304981	0.531042	0.739792	0.20875
cg00448563	0.254038	0.0012376	0.000462787	2.67424	0.0141969	0.332118	0.415938	0.547703	0.131765
cg00448707	0.252258	0.00168088	0.000631509	2.66168	0.0145961	0.334158	0.669303	0.860438	0.191135
cg00448875	0.177382	0.00156502	0.000735454	2.12797	0.0453474	0.455102	0.53808	0.720027	0.181947
cg00449364	0.22212	0.00183284	0.000748476	2.44876	0.023201	0.378391	0.580152	0.820246	0.240094
cg00449482	0.303201	-0.00191008	0.000631874	-3.02288	0.00647396	0.275724	0.211125	0.401466	0.190341
cg00449763	0.202578	0.000667116	0.000288828	2.30973	0.03116	0.409942	0.843425	0.922341	0.0789163
cg00449812	0.225063	0.00151637	0.000614011	2.46961	0.022185	0.373905	0.427346	0.617094	0.189748
cg00450057	0.178675	0.000761865	0.000356446	2.13739	0.0444877	0.452857	0.847558	0.955641	0.108083
cg00450164	0.172601	0.00148952	0.000711658	2.09302	0.0486688	0.464108	0.580619	0.840555	0.259936
cg00450516	0.266278	-0.00406798	0.00147356	-2.76065	0.0117171	0.317789	0.353387	0.804457	0.45107
cg00450930	0.244097	0.000204961	7.87073e-05	2.6041	0.0165666	0.345717	0.0210466	0.0472756	0.026229
cg00451058	0.359795	0.000969957	0.000282342	3.4354	0.00248272	0.226324	0.0683194	0.170383	0.102064
cg00452079	0.216444	0.000579834	0.000240745	2.4085	0.0252864	0.387078	0.900249	0.981943	0.0816943
cg00452500	0.242445	-0.00116151	0.000448037	-2.59244	0.0169948	0.348518	0.073875	0.199399	0.125524
cg00452639	0.226732	0.000536817	0.000216334	2.48142	0.0216279	0.37117	0.432599	0.491217	0.0586175
cg00452654	0.38509	0.00196217	0.000541068	3.62648	0.00158122	0.207938	0.630505	0.808278	0.177774
cg00453111	0.224121	0.000583198	0.000236789	2.46294	0.0225056	0.375352	0.0680031	0.141493	0.0734904
cg00453202	0.197674	0.00154577	0.000679574	2.27462	0.0335346	0.418598	0.158608	0.355333	0.196725
cg00453864	0.195735	-0.00129406	0.000572414	-2.26071	0.0345204	0.422054	0.578286	0.752116	0.17383
cg00453932	0.215629	0.00133076	0.000553858	2.40272	0.0256	0.388121	0.678565	0.843744	0.165179
cg00453938	0.225647	0.00290541	0.0011745	2.47374	0.0219887	0.372975	0.485456	0.815177	0.329721
cg00454042	0.253259	0.00137489	0.000515181	2.66875	0.0143702	0.333144	0.133159	0.281542	0.148383
cg00454346	0.239671	0.000786182	0.000305567	2.57286	0.0177378	0.352247	0.833907	0.933469	0.0995617
cg00454409	0.418632	0.000341683	8.78664e-05	3.88866	0.000847543	0.188566	0.0347491	0.0698087	0.0350596
cg00454447	0.267863	-0.00034198	0.000123376	-2.77185	0.0114275	0.315964	0.926272	0.96506	0.0387874
cg00454592	0.184975	0.000377867	0.000173085	2.18313	0.0405199	0.440667	0.886177	0.933671	0.0474942
cg00454721	0.214447	0.000140779	5.87971e-05	2.39432	0.0260617	0.390089	0.0186	0.0374813	0.0188813
cg00454770	0.323149	0.00276428	0.000873008	3.16639	0.00465216	0.256917	0.321781	0.613589	0.291809
cg00455178	0.289491	0.00020626	7.05135e-05	2.92511	0.00809063	0.28959	0.0215081	0.0435945	0.0220864
cg00455452	0.411175	0.00401539	0.00104857	3.82939	0.000976185	0.191729	0.198963	0.543624	0.34466
cg00455546	0.239246	-0.000712103	0.000277098	-2.56986	0.0178543	0.352809	0.851387	0.952124	0.100737
cg00455823	0.173603	-0.00297856	0.00141812	-2.10036	0.0479535	0.462085	0.445483	0.866964	0.421481
cg00456216	0.207693	0.000911985	0.000388699	2.34625	0.0288556	0.401057	0.441577	0.562429	0.120852
cg00456326	0.18198	0.000614037	0.000284089	2.16142	0.0423614	0.445916	0.875715	0.961429	0.0857144
cg00456551	0.170893	-0.00033999	0.000163418	-2.08049	0.0499117	0.467589	0.89914	0.952981	0.0538406
cg00456672	0.230361	0.00125188	0.000499335	2.50709	0.0204622	0.366282	0.699505	0.834014	0.134509
cg00456774	0.394769	-0.00153655	0.00041517	-3.70101	0.00132492	0.201043	0.463945	0.588793	0.124849
cg00457361	0.22999	-0.00208327	0.000831821	-2.50447	0.0205783	0.366842	0.130972	0.411792	0.28082
cg00458016	0.301094	0.0023436	0.000779171	3.00782	0.00670101	0.277888	0.0836243	0.337938	0.254313
cg00458793	0.221352	-0.00127293	0.000520984	-2.44333	0.023473	0.379568	0.761133	0.910499	0.149366
cg00458878	0.207951	0.00178245	0.000759106	2.34809	0.0287439	0.400575	0.176194	0.403256	0.227062
cg00458910	0.316222	0.000834642	0.000267826	3.11636	0.00522229	0.26155	0.109229	0.199082	0.0898529
cg00459218	0.238015	-0.000916069	0.000357675	-2.56117	0.0181956	0.354718	0.8534	0.951176	0.0977765
cg00459232	0.364752	0.00277439	0.000798972	3.47246	0.00227538	0.222764	0.125896	0.395277	0.269381
cg00459354	0.275467	0.00110581	0.000391349	2.82563	0.0101297	0.306514	0.763996	0.89197	0.127974
cg00459440	0.212124	0.000370167	0.000155676	2.3778	0.0269921	0.393778	0.9237	0.967678	0.0439779
cg00459447	0.183522	0.000506944	0.000233334	2.17261	0.0414033	0.443145	0.10479	0.192372	0.087582
cg00459589	0.180382	0.00080939	0.000376493	2.14981	0.0433769	0.449258	0.824674	0.928477	0.103802
cg00459757	0.171508	0.000865459	0.000415086	2.08501	0.0494603	0.46651	0.773844	0.891244	0.1174
cg00459845	0.171101	-0.00162277	0.000779421	-2.08202	0.0497587	0.467226	0.277615	0.494999	0.217384
cg00459909	0.304952	-0.00127926	0.000421446	-3.03541	0.00629073	0.274056	0.757936	0.893295	0.135359
cg00460368	0.454274	-0.000615228	0.000147148	-4.18101	0.000421484	0.167851	0.899977	0.949907	0.04993
cg00460457	0.362176	-0.000399628	0.000115728	-3.45318	0.00238105	0.224745	0.927805	0.965085	0.0372795
cg00460471	0.343609	-0.00305696	0.000921995	-3.31559	0.00328789	0.23995	0.629377	0.895561	0.266184
cg00460485	0.273032	0.000965005	0.000343614	2.8084	0.0105294	0.309613	0.741506	0.848419	0.106912
cg00460911	0.217808	0.000372096	0.000153874	2.41819	0.0247695	0.384922	0.0294214	0.0817719	0.0523505
cg00460916	0.257378	0.00105503	0.000391069	2.69781	0.0134752	0.328503	0.616039	0.737514	0.121475
cg00461299	0.175651	-0.000772732	0.0003653	-2.11533	0.0465238	0.458426	0.728545	0.87133	0.142785
cg00462004	0.258956	0.00103223	0.000381046	2.70895	0.0131464	0.326783	0.827854	0.94632	0.118466
cg00462443	0.20629	0.0003489	0.000149342	2.33624	0.0294711	0.403307	0.925693	0.969836	0.0441431
cg00462480	0.38599	0.00148264	0.000408063	3.63337	0.00155558	0.20692	0.759202	0.892796	0.133593
cg00463491	0.268903	0.00246543	0.000887102	2.7792	0.0112413	0.314955	0.632862	0.900444	0.267582
cg00463562	0.232915	0.000364015	0.000144156	2.52515	0.0196777	0.362359	0.0558395	0.101648	0.0458086
cg00464056	0.335932	0.000138722	4.25613e-05	3.25933	0.00374902	0.246309	0.0187133	0.0336785	0.0149652
cg00464519	0.274398	0.000433953	0.00015399	2.81806	0.0103034	0.308054	0.0727396	0.113953	0.0412132
cg00464647	0.361574	0.00221222	0.000641469	3.44868	0.00240636	0.22531	0.254574	0.468109	0.213535
cg00464681	0.430051	0.00151963	0.000381756	3.98063	0.000680494	0.181846	0.779928	0.899621	0.119693
cg00464852	0.252587	0.00205195	0.00077025	2.664	0.0145216	0.333813	0.321224	0.529775	0.208551
cg00465013	0.170825	0.00272198	0.00130865	2.07999	0.049962	0.467679	0.303138	0.647904	0.344766
cg00465131	0.200417	0.00119453	0.000520657	2.29427	0.0321857	0.41389	0.423314	0.544012	0.120699
cg00465319	0.3215	0.00247925	0.000785951	3.15446	0.00478234	0.258167	0.285508	0.565418	0.27991
cg00466071	0.174028	0.00132578	0.000630281	2.10347	0.047653	0.461406	0.307287	0.506379	0.199092
cg00466425	0.384223	-0.00144784	0.000399974	-3.61984	0.00160626	0.20844	0.400143	0.559095	0.158952
cg00466935	0.315816	-0.00033919	0.000108944	-3.11344	0.00525758	0.261965	0.938516	0.97231	0.0337942
cg00467722	0.347422	0.0010714	0.000320426	3.34366	0.00307896	0.237517	0.802282	0.913794	0.111512
cg00468125	0.278293	0.00126512	0.00044458	2.84565	0.00968353	0.303046	0.604836	0.756728	0.151893
cg00468511	0.458489	0.0024907	0.000590678	4.21668	0.000387016	0.166059	0.594104	0.806841	0.212737
cg00468823	0.243248	-0.00273419	0.00105238	-2.59811	0.0167854	0.347188	0.337417	0.674842	0.337425
cg00469029	0.244801	0.00193398	0.000741253	2.60907	0.016387	0.344803	0.408436	0.65883	0.250394
cg00469205	0.316096	0.00143775	0.000461488	3.11546	0.00523319	0.261653	0.669769	0.827606	0.157837
cg00469284	0.182441	0.00159146	0.000735166	2.16477	0.042073	0.445054	0.627105	0.805775	0.178671
cg00469310	0.42173	0.00156609	0.000400179	3.91347	0.000798839	0.185648	0.548055	0.68086	0.132805
cg00469380	0.250476	0.00104104	0.000392978	2.64911	0.0150064	0.336563	0.387022	0.52161	0.134588
cg00469897	0.270689	0.00238279	0.000853488	2.79182	0.0109281	0.313096	0.0806368	0.338602	0.257965
cg00469952	0.234678	0.00141727	0.000558505	2.53761	0.0191527	0.35991	0.669711	0.826165	0.156454
cg00470154	0.187174	0.000786971	0.000357869	2.19904	0.0392171	0.437046	0.822791	0.922735	0.099944
cg00470192	0.245059	0.000682454	0.000261387	2.61089	0.0163217	0.344381	0.873698	0.960271	0.0865731
cg00470636	0.278113	0.00183364	0.000644656	2.84437	0.0097114	0.303346	0.250891	0.45916	0.208268
cg00470748	0.20054	0.000290694	0.000126656	2.29515	0.0321265	0.413677	0.0289422	0.0685291	0.0395869
cg00470947	0.196217	0.00136908	0.000604671	2.26417	0.0342727	0.421135	0.705699	0.874275	0.168576
cg00471037	0.326397	-0.000407199	0.000127652	-3.18993	0.00440523	0.253757	0.926605	0.971552	0.0449474
cg00471141	0.260711	-0.00220826	0.000811463	-2.72133	0.0127896	0.324656	0.431059	0.648548	0.21749
cg00471443	0.294623	0.000600925	0.000202903	2.96164	0.00744579	0.284563	0.887709	0.957846	0.0701373
cg00471645	0.299159	0.000544635	0.000181909	2.99399	0.00691611	0.280222	0.0437335	0.110374	0.0666401
cg00471821	0.389742	-0.000734965	0.000200689	-3.6622	0.00145279	0.204515	0.887465	0.95562	0.0681541
cg00472029	0.177819	0.000510458	0.000239522	2.13115	0.0450552	0.454351	0.884664	0.95509	0.0704267
cg00472067	0.177974	-0.000352289	0.000165217	-2.13228	0.044952	0.454135	0.88785	0.942296	0.0544458
cg00472246	0.221697	0.00154165	0.000630333	2.44577	0.0233504	0.379071	0.0668	0.279118	0.212318
cg00472277	0.293716	0.00301883	0.00102154	2.95518	0.00755615	0.28528	0.281595	0.539821	0.258226
cg00472281	0.281634	-0.0014192	0.00049461	-2.86932	0.00917998	0.299194	0.469082	0.63922	0.170138
cg00472411	0.202079	-0.000399863	0.000173389	-2.30616	0.0313941	0.410843	0.91555	0.972052	0.0565013
cg00472687	0.18232	-0.000677235	0.000312971	-2.16389	0.0421485	0.445307	0.658828	0.745216	0.0863874
cg00472691	0.199145	-0.00226776	0.000992384	-2.28517	0.0328045	0.415901	0.221876	0.523728	0.301852
cg00472783	0.225811	0.000315411	0.000127443	2.47491	0.0219336	0.372715	0.926539	0.96081	0.0342714
cg00472898	0.458534	-0.0008975	0.000212826	-4.21706	0.000386661	0.166059	0.843998	0.912068	0.0680704
cg00472914	0.344035	-0.000887824	0.00026752	-3.31872	0.00326395	0.23995	0.867563	0.948339	0.0807762
cg00473045	0.222169	0.00068807	0.000280947	2.44911	0.0231835	0.378298	0.806225	0.894536	0.088311
cg00473755	0.187362	-0.000746601	0.000339302	-2.2004	0.0391078	0.436674	0.823466	0.925452	0.101986
cg00473977	0.179914	0.000882368	0.00041109	2.14641	0.0436787	0.450175	0.766252	0.875863	0.109611
cg00474080	0.342926	0.00278875	0.000842378	3.31057	0.00332669	0.240507	0.0803729	0.342182	0.261809
cg00474281	0.241292	0.000395222	0.000152932	2.5843	0.0173	0.350026	0.906644	0.950229	0.0435853
cg00474517	0.272935	-0.00220562	0.000785559	-2.80771	0.0105456	0.309706	0.113302	0.352307	0.239005
cg00474746	0.180991	0.000760909	0.000353215	2.15424	0.042987	0.447922	0.110458	0.215759	0.105301
cg00474840	0.439528	-0.00374582	0.000923041	-4.05813	0.000565447	0.177108	0.452221	0.846984	0.394763
cg00474889	0.197858	0.00125899	0.000553173	2.27594	0.0334422	0.418319	0.121892	0.276431	0.154539
cg00475490	0.392086	0.00128416	0.000348932	3.68027	0.00139181	0.203242	0.739543	0.850918	0.111375
cg00475509	0.315884	0.00272552	0.000875267	3.11393	0.00525172	0.26188	0.456651	0.747313	0.290663
cg00475539	0.373944	0.00253558	0.00071593	3.54165	0.00193267	0.215254	0.195889	0.42202	0.226131
cg00475606	0.303804	0.000148901	4.91877e-05	3.02719	0.0064103	0.275166	0.0285898	0.0455139	0.016924
cg00475787	0.18973	-0.00211861	0.000955404	-2.2175	0.037754	0.432717	0.593211	0.867244	0.274033
cg00476814	0.181181	0.000266946	0.000123837	2.15562	0.0428664	0.447684	0.0493243	0.0927605	0.0434362
cg00477015	0.266897	0.000757442	0.000273937	2.76502	0.0116032	0.316926	0.867316	0.94542	0.0781038
cg00477633	0.179865	-0.000224276	0.000104506	-2.14606	0.0437101	0.450243	0.929923	0.958029	0.0281064
cg00477978	0.267666	0.000842666	0.000304161	2.77046	0.0114632	0.316138	0.632216	0.72805	0.0958336
cg00478717	0.226976	0.0028004	0.00112776	2.48315	0.0215477	0.370894	0.48869	0.868576	0.379887
cg00478856	0.258928	0.00105577	0.000389762	2.70875	0.013152	0.326792	0.174218	0.32431	0.150091
cg00478874	0.206876	0.000334395	0.000142878	2.34042	0.0292127	0.402355	0.0531077	0.092081	0.0389734
cg00478908	0.185613	0.00111101	0.000507833	2.18776	0.0401375	0.439626	0.505683	0.661814	0.156132
cg00479110	0.309462	0.00130402	0.000425075	3.06775	0.00584077	0.268972	0.387444	0.512097	0.124653
cg00479208	0.211824	-0.000346166	0.000145713	-2.37566	0.0271148	0.394167	0.889879	0.932339	0.0424597
cg00479240	0.228409	0.0017875	0.000716922	2.49329	0.0210814	0.369039	0.359236	0.578179	0.218943
cg00479300	0.180803	0.00030222	0.00014038	2.15287	0.0431073	0.448302	0.923417	0.958303	0.0348864
cg00479443	0.193303	0.00137038	0.000610898	2.24323	0.0357966	0.426786	0.104945	0.260669	0.155725
cg00479745	0.270507	0.00171259	0.000613711	2.79054	0.0109595	0.313199	0.533151	0.732711	0.19956
cg00480077	0.182404	0.000438557	0.000202614	2.1645	0.0420958	0.445119	0.908812	0.96478	0.0559678
cg00480149	0.270771	0.0032321	0.00115746	2.7924	0.0109139	0.313063	0.10159	0.402329	0.300739
cg00480389	0.308608	-0.000347888	0.000113629	-3.06162	0.00592358	0.269875	0.0444623	0.0773196	0.0328573
cg00480422	0.214702	-0.0010085	0.000420887	-2.39613	0.0259616	0.389605	0.77201	0.89452	0.122509
cg00480559	0.288151	-0.00061402	0.000210599	-2.91559	0.00826742	0.291439	0.863424	0.927522	0.0640975
cg00481159	0.191513	0.00266032	0.00119278	2.23034	0.0367648	0.429919	0.517578	0.868972	0.351394
cg00481350	0.338251	0.00250602	0.000764896	3.27629	0.00360378	0.243897	0.349903	0.564008	0.214104
cg00481884	0.21409	0.00109324	0.000457081	2.39178	0.0262027	0.390638	0.415559	0.551113	0.135555
cg00481951	0.317783	0.00040612	0.000129849	3.12762	0.00508838	0.26046	0.027381	0.0780939	0.0507129
cg00482319	0.174757	0.000222434	0.000105479	2.1088	0.0471426	0.460037	0.0195446	0.0512045	0.0316599
cg00482464	0.18065	0.000900909	0.000418685	2.15176	0.043205	0.448677	0.747142	0.857234	0.110092
cg00482489	0.261484	-0.000847285	0.000310726	-2.72679	0.0126353	0.323416	0.83647	0.940068	0.103598
cg00483217	0.189691	0.00175566	0.000791831	2.21721	0.0377762	0.43278	0.37742	0.625186	0.247766
cg00483446	0.225422	0.000507022	0.000205093	2.47215	0.0220641	0.373369	0.0295974	0.0896984	0.060101
cg00483459	0.210228	-0.00161002	0.000680968	-2.36431	0.0277751	0.396637	0.688344	0.903025	0.21468
cg00483852	0.362512	0.0030754	0.000889952	3.45569	0.002367	0.22452	0.217226	0.52955	0.312324
cg00483940	0.181069	0.000331875	0.000154016	2.1548	0.0429375	0.447826	0.0279943	0.0740105	0.0460161
cg00484358	0.223964	0.000515094	0.000209232	2.46183	0.0225592	0.375563	0.298075	0.35352	0.0554455
cg00485201	0.228587	0.000483761	0.000193927	2.49455	0.0210243	0.368702	0.88343	0.946679	0.0632494
cg00485681	0.330507	0.000305603	9.49141e-05	3.21978	0.00411032	0.250684	0.0551983	0.083474	0.0282757
cg00485807	0.211192	0.00171358	0.000722673	2.37117	0.0273743	0.395246	0.693318	0.911724	0.218406
cg00486352	0.361661	0.000504643	0.000146302	3.44933	0.00240271	0.225146	0.0485694	0.107027	0.0584578
cg00486436	0.347276	-0.000319075	9.54575e-05	-3.34259	0.00308673	0.237543	0.931743	0.968312	0.036569
cg00487226	0.263971	-0.000308374	0.000112367	-2.74436	0.0121508	0.320299	0.941473	0.974128	0.0326549
cg00487817	0.170818	-0.000561873	0.000270139	-2.07994	0.0499672	0.467686	0.837523	0.924964	0.087441
cg00488150	0.182577	0.000554155	0.000255871	2.16575	0.041988	0.444774	0.815361	0.881904	0.0665422
cg00488174	0.190608	-0.00284676	0.00128012	-2.22382	0.0372638	0.431175	0.388734	0.753542	0.364807
cg00488501	0.259499	0.00118942	0.00043845	2.71278	0.0130349	0.326042	0.170314	0.30981	0.139497
cg00488788	0.289557	0.000869879	0.000297336	2.92558	0.00808208	0.289529	0.0976474	0.189417	0.0917696
cg00488948	0.192588	0.00124692	0.000557139	2.23808	0.0361804	0.428154	0.777262	0.910706	0.133444
cg00489394	0.181468	0.00117276	0.00054352	2.15771	0.042684	0.447046	0.713879	0.875975	0.162097
cg00489660	0.343571	0.00251216	0.000757746	3.31531	0.00329008	0.239962	0.136716	0.357806	0.22109
cg00489988	0.192685	0.00100563	0.000449185	2.23878	0.0361281	0.427974	0.82861	0.948172	0.119562
cg00490606	0.325501	0.00159937	0.000502404	3.18343	0.00447211	0.254459	0.107602	0.285741	0.178139
cg00491021	0.399098	0.0033528	0.000897759	3.73463	0.00122318	0.198256	0.3225	0.591605	0.269105
cg00491083	0.181284	0.00203618	0.000944263	2.15637	0.0428006	0.447445	0.449137	0.698037	0.2489
cg00491422	0.214817	-0.00127414	0.000531567	-2.39695	0.0259164	0.389458	0.187568	0.333693	0.146125
cg00491457	0.186137	0.000142441	6.49957e-05	2.19154	0.0398267	0.438768	0.953263	0.971032	0.0177692
cg00491851	0.183423	-0.000198917	9.1587e-05	-2.17189	0.0414644	0.443276	0.0300443	0.0563856	0.0263414
cg00491927	0.218044	0.00215967	0.000892476	2.41986	0.0246809	0.384382	0.21995	0.493782	0.273832
cg00492070	0.192536	0.00143607	0.000641761	2.23771	0.0362085	0.428215	0.681976	0.865686	0.183709
cg00492083	0.413784	-0.000506723	0.000131614	-3.85006	0.000929271	0.190716	0.91121	0.954573	0.0433634
cg00492309	0.252953	-0.000712511	0.0002672	-2.66658	0.014439	0.333588	0.874539	0.947336	0.0727973
cg00492381	0.238613	0.0026462	0.0010315	2.56539	0.0180291	0.353597	0.465445	0.820082	0.354637
cg00492719	0.216586	-0.00266553	0.00110625	-2.40951	0.025232	0.386892	0.0684315	0.40983	0.341399
cg00492979	0.390627	0.00263409	0.000717928	3.66901	0.0014295	0.20384	0.305451	0.574782	0.269331
cg00493389	0.28968	-0.000726115	0.000248121	-2.92645	0.00806605	0.289339	0.805784	0.873406	0.0676221
cg00493831	0.229813	0.000342699	0.000136903	2.50322	0.0206342	0.367069	0.025666	0.0705634	0.0448974
cg00494337	0.228313	0.00149521	0.000599858	2.49261	0.0211124	0.369135	0.11714	0.2674	0.15026
cg00494550	0.173829	0.00104628	0.000497752	2.10202	0.0477936	0.46168	0.638009	0.763468	0.125459
cg00494644	0.317244	0.00123146	0.000394229	3.12373	0.00513427	0.260927	0.776199	0.909838	0.133639
cg00495658	0.226799	0.00106836	0.000430458	2.4819	0.0216057	0.371104	0.438409	0.564072	0.125663
cg00496036	0.178033	-0.000603559	0.000283001	-2.13271	0.0449127	0.454033	0.842506	0.941128	0.0986217
cg00496504	0.186077	-0.00155732	0.000710744	-2.19111	0.0398621	0.438906	0.560817	0.802218	0.241401
cg00496828	0.182166	0.000809774	0.000374415	2.16277	0.0422446	0.445623	0.197073	0.310102	0.113029
cg00496939	0.263132	0.00281293	0.0010272	2.73843	0.0123122	0.321316	0.315811	0.699858	0.384047
cg00496967	0.30213	0.00177408	0.000588373	3.01522	0.00658844	0.276789	0.581939	0.757202	0.175263
cg00497226	0.215582	0.000657945	0.000273872	2.40238	0.0256182	0.388214	0.875404	0.947796	0.0723922
cg00497611	0.423514	-0.00253612	0.000645686	-3.9278	0.000771983	0.184515	0.715221	0.926737	0.211516
cg00497679	0.296684	0.00218982	0.000735745	2.97634	0.00720052	0.282842	0.257189	0.486259	0.229069
cg00498129	0.281184	0.00236848	0.000826369	2.86613	0.00924638	0.299513	0.422567	0.69132	0.268753
cg00498146	0.228939	0.00210752	0.000844006	2.49704	0.0209115	0.368301	0.393033	0.641493	0.24846
cg00498604	0.202659	0.000225257	9.75007e-05	2.31031	0.0311222	0.409811	0.0232511	0.0504587	0.0272076
cg00498626	0.177354	-0.000545095	0.000256182	-2.12776	0.0453665	0.455133	0.846054	0.921103	0.0750486
cg00498816	0.176711	0.000907893	0.000427632	2.12307	0.0458	0.456094	0.806754	0.940974	0.13422
cg00499524	0.295376	0.000256145	8.63311e-05	2.96701	0.00735529	0.284093	0.0331587	0.0671751	0.0340164
cg00499599	0.214721	-0.000182846	7.63045e-05	-2.39627	0.0259539	0.389557	0.0319136	0.0613139	0.0294003
cg00499700	0.210415	-0.00183819	0.000777037	-2.36564	0.0276968	0.396337	0.467444	0.744133	0.27669
cg00499837	0.320756	0.00169115	0.000537028	3.14908	0.00484218	0.258577	0.274652	0.43581	0.161158
cg00500176	0.237594	0.000426802	0.000166837	2.5582	0.018314	0.355353	0.91024	0.954755	0.0445159
cg00500522	0.263372	0.000763085	0.000278486	2.74012	0.0122659	0.321018	0.0360623	0.12207	0.0860073
cg00500705	0.258601	0.000284861	0.000105253	2.70644	0.0132197	0.326919	0.0355469	0.0705826	0.0350357
cg00501105	0.411133	-0.00243601	0.00063619	-3.82906	0.000976965	0.191729	0.747499	0.954427	0.206928
cg00501221	0.223737	0.00270071	0.00109775	2.46022	0.0226375	0.375871	0.368335	0.767481	0.399146
cg00501366	0.273781	-0.000937892	0.00033333	-2.8137	0.0104048	0.308745	0.805405	0.9033	0.0978948
cg00501952	0.268055	0.000760691	0.0002743	2.77321	0.0113929	0.315749	0.203731	0.285097	0.0813661
cg00502017	0.222335	0.00164495	0.000671329	2.45029	0.0231252	0.37799	0.409879	0.648115	0.238235
cg00502077	0.179913	-0.00121281	0.000565045	-2.1464	0.0436793	0.450175	0.142267	0.308718	0.166451
cg00502597	0.413848	0.00242272	0.000629184	3.85057	0.000928136	0.190716	0.608137	0.822133	0.213996
cg00503253	0.30606	0.00139594	0.000458685	3.04335	0.00617725	0.272693	0.747026	0.874875	0.127849
cg00503302	0.377797	0.00118287	0.000331255	3.57086	0.00180375	0.213212	0.0242572	0.158017	0.133759
cg00503458	0.197889	0.000695766	0.000305675	2.27616	0.0334267	0.418271	0.0272007	0.119336	0.0921355
cg00503554	0.21135	0.000256898	0.000108291	2.37229	0.0273093	0.395036	0.935209	0.968007	0.032798
cg00504248	0.176044	-0.00161131	0.000760695	-2.1182	0.0462542	0.457586	0.576566	0.803847	0.227281
cg00504782	0.273951	0.00123617	0.00043915	2.8149	0.0103768	0.308504	0.552444	0.681772	0.129328
cg00504897	0.173736	-0.000673595	0.000320556	-2.10133	0.0478596	0.461938	0.854727	0.926177	0.07145
cg00504902	0.212318	0.00109552	0.000460462	2.37918	0.0269131	0.39343	0.274303	0.397808	0.123505
cg00505073	0.2058	-0.00100195	0.000429514	-2.33275	0.0296887	0.404261	0.760852	0.874425	0.113573
cg00505307	0.195359	-0.000234606	0.000103899	-2.25801	0.0347146	0.422804	0.934973	0.967589	0.0326157
cg00505597	0.335727	-0.00132514	0.000406754	-3.25784	0.00376209	0.246463	0.776642	0.902272	0.125631
cg00505606	0.224946	0.00107358	0.000434862	2.46878	0.0222246	0.374109	0.471996	0.590972	0.118975
cg00506062	0.280956	-0.0018365	0.00064112	-2.86451	0.00928017	0.299763	0.258248	0.476846	0.218598
cg00506198	0.186646	-0.000868607	0.00039568	-2.19522	0.0395264	0.437836	0.746539	0.849526	0.102986
cg00506277	0.294396	-0.000276446	9.33932e-05	-2.96002	0.00747326	0.284764	0.924101	0.95905	0.0349489
cg00506299	0.265744	0.00212971	0.000772507	2.75688	0.0118162	0.318497	0.536673	0.742358	0.205685
cg00506482	0.196825	-0.000435541	0.000191992	-2.26853	0.0339627	0.420124	0.890857	0.950599	0.0597422
cg00506539	0.198136	0.00234988	0.00103158	2.27793	0.0333036	0.417726	0.531565	0.883516	0.35195
cg00506540	0.185186	0.000498569	0.000228213	2.18466	0.040393	0.44034	0.847583	0.916864	0.0692811
cg00506625	0.209066	-0.000823419	0.000349494	-2.35603	0.0282657	0.398559	0.792128	0.897345	0.105217
cg00508023	0.240137	-0.0027611	0.00107179	-2.57615	0.0176109	0.351595	0.366312	0.699973	0.333661
cg00508158	0.175644	0.000917163	0.000433588	2.11529	0.0465283	0.458446	0.774344	0.925558	0.151213
cg00508283	0.306395	0.00350875	0.00115201	3.04575	0.00614334	0.272331	0.285147	0.671243	0.386096
[truncated: 89,902 more rows]
